# Supplementary material
Source: publisher figshare collection journal article supplement (https://acs.figshare.com/ndownloader/files/9049924)

Electronic Supporting Information for

# **QUATERNARY AMMONIUM SALTS AS ALKYLATING REAGENTS IN C-H ACTIVATION CHEMISTRY**

Manuel Spettel, Robert Pollice, and Michael Schnürch\*

Institute of Applied Synthetic Chemistry, TU Wien, Getreidemarkt 9/163-OC, Vienna 1060, Austria

## Table of Contents

|                                                                                        |    |
|----------------------------------------------------------------------------------------|----|
| 1. General Methods.....                                                                | 1  |
| 2. Experimental Procedures.....                                                        | 2  |
| 2.1. General Procedure for C-H activation reactions.....                               | 2  |
| 2.2. General work-up procedure for C-H activation reactions.....                       | 2  |
| 2.3. Optimization process for alkylation reactions using quaternary ammonium salts.... | 2  |
| 2.4. Influence of Counterions .....                                                    | 3  |
| 3. Synthetic Procedures .....                                                          | 4  |
| 3.1. Precursor Synthesis .....                                                         | 4  |
| 3.1.1. N-Benzyl-3-methylpyridin-2-amine (1) .....                                      | 4  |
| 3.1.2. N-Benzyl-3-chloropyridin-2-amine (21).....                                      | 5  |
| 3.1.3. N-Benzyl-3-phenylpyridin-2-amine (22).....                                      | 6  |
| 3.2. Substrate Scope – Tetraalkylammonium Salts .....                                  | 7  |
| 3.2.1. 3-Methyl-N-(1-phenylpropyl)pyridin-2-amine (2) .....                            | 7  |
| 3.2.2. 3-Methyl-N-(1-phenylbutyl)pyridin-2-amine (3) .....                             | 8  |
| 3.2.3. 3-Methyl-N-(1-phenylpentyl)pyridin-2-amine (4).....                             | 9  |
| 3.2.4. 3-Methyl-N-(1-phenylhexyl)pyridin-2-amine (5) .....                             | 10 |
| 3.2.5. 3-Methyl-N-(1-phenylheptyl)pyridin-2-amine (6).....                             | 11 |
| 3.2.6. 3-Methyl-N-(1-phenylnonyl)pyridin-2-amine (7).....                              | 12 |
| 3.3. Substrate Scope – Target Compound.....                                            | 13 |
| 3.3.1. 3-phenyl-N-(1-phenylpropyl)pyridin-2-amine (8).....                             | 13 |
| 3.3.2. 3-Phenyl-N-(1-(4-methylphenyl)propyl)pyridin-2-amine (9).....                   | 14 |
| 3.3.3. 3-Mesityl-N-(1-phenylpropyl)pyridin-2-amine (10) .....                          | 15 |
| 3.3.4. 3-(4-Isopropoxyphenyl)-N-(1-phenylpropyl)pyridin-2-amine (11) .....             | 16 |
| 3.3.5. N-(1-(4-(Dimethylamino)phenyl)propyl)-3-methylpyridin-2-amine (12) .....        | 17 |
| 3.3.6. N-(4-isopropoxybenzyl)-3-methylpyridin-2-amine (13) .....                       | 18 |
| 3.3.7. 3-Methyl-N-(1-(4-(trifluoromethyl)phenyl)propyl)pyridin-2-amine (14).....       | 19 |
| 3.3.8. N-(1-(4-Methoxyphenyl)propyl)-3-methylpyridin-2-amine (15) .....                | 20 |
| 3.3.9. N-(1-(4-fluorophenyl)propyl)-3-methylpyridin-2-amine (16).....                  | 21 |
| 3.4. Alternative Substrates .....                                                      | 22 |

|        |                                                              |    |
|--------|--------------------------------------------------------------|----|
| 3.4.1. | 1-(2-Ethylphenyl)ethan-1-one (18) .....                      | 22 |
| 3.4.2. | 1-(2-ethylphenyl)-N-(4-methoxyphenyl)ethan-1-imine (20)..... | 23 |
| 3.5.   | GC Calibration .....                                         | 24 |
| 3.5.1. | General Procedure .....                                      | 24 |
| 3.5.2. | N-Benzyl-3-methylpyridin-2-amine (1) .....                   | 25 |
| 3.5.3. | 3-Methyl-N-(1-phenylpropyl)pyridin-2-amine (2) .....         | 26 |
| 3.5.4. | 3-Methyl-N-(1-phenylpentyl)pyridin-2-amine (4).....          | 27 |
| 4.     | NMR Spectra of New Compounds .....                           | 27 |

## 1. General Methods

In general, unless noted otherwise, chemicals were purchased from commercial suppliers and used without further purification. Cyclooctadiene rhodium chloride dimer  $[\text{RhCl}(\text{cod})]_2$  was handled in the glovebox under argon. Dry and degassed toluene was stored over molecular sieves in the glovebox under argon. Other dry solvents were obtained by passing pre-dried material through a cartridge containing activated alumina (solvent dispensing system) and stored under nitrogen atmosphere until usage.

$^1\text{H}$ -NMR,  $\text{C}^{13}$ -NMR and HSQC spectra were recorded on a Bruker Avance 400, chemical shifts are reported in ppm, using  $\text{Me}_4\text{Si}$  as internal standard. NMR signals were assigned according to Figure 1 with different aromatic systems marked as a, b and c and numbers without labels assigned to the aliphatic molecule part.

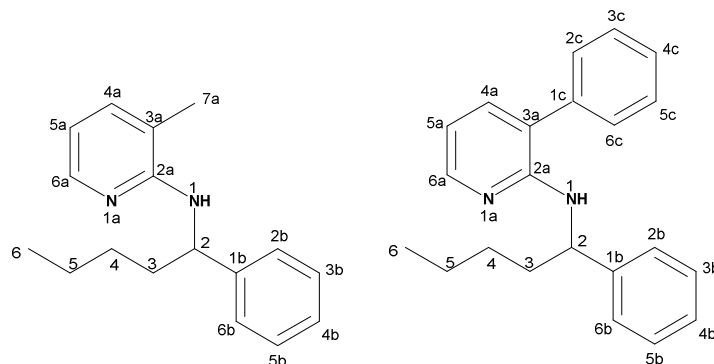

Figure 1: Scheme for assigning NMR Signals

GC-MS was performed on a Thermo Trace 1300 GC/ MS ISQ LT (quadrupole, EI+) with a TR-5 capillary column (7m x 0.32 mm, 0.25 $\mu\text{m}$  film, achiral). Temperature program: Start at 100  $^{\circ}\text{C}$  (hold 2 min), 35  $^{\circ}\text{C}/\text{min}$ , 300  $^{\circ}\text{C}$  (hold 4 min).

GC spectra were recorded on a Thermo Focus GC using a BGB-5 capillary column (30m x 0.32 mm, 1.0 $\mu\text{m}$  film, achiral) with the following oven temperature program: Start at 100  $^{\circ}\text{C}$  (hold 2 min), 35  $^{\circ}\text{C}/\text{min}$ , 300 $^{\circ}\text{C}$  (hold 4 min).

GC yields were calculated by using the response factor of the corresponding compound relative to dodecane as internal standard, which was determined by calibration.

For TLC aluminum backed silica gel 60 with fluorescence indicator F254 was used. Column chromatography was performed on Silica 60 from Merck (40  $\mu\text{m}$  – 63  $\mu\text{m}$ ). Flash chromatography, was carried out on a Büchi Sepacore<sup>TM</sup> MPLC system.

Melting points were determined on an automated melting point system (Büchi Melting Point B-545) and are uncorrected.



High-resolution mass spectrometry (HRMS) for literature-unknown compounds was performed by liquid chromatography in combination with hybrid ion trap and high-resolution time-of-flight mass spectrometry (LC-IT-TOF-MS) in only positive-ion detection mode with the recording of standard (MS) and tandem (MS/MS) spectra.

## 2. Experimental Procedures

### 2.1. General Procedure for C-H activation reactions

Solid starting materials (except the catalyst) were placed in an oven-dried 8 ml glass vial with a septum screw cap and a magnetic stirring bar. The vial was transferred into the glovebox under argon. Catalyst, solvent and dodecane were added in the glovebox. Finally, the vial was closed and the reaction mixture was heated in a heating block for the desired time at the desired temperature

### 2.2. General work-up procedure for C-H activation reactions

After cooling the reaction mixture to room temperature, the solid material was removed by filtration using a Pasteur pipette with cotton and silica. The residue was washed with CH<sub>2</sub>Cl<sub>2</sub>. The combined organic filtrate was concentrated under reduced pressure. The resulting crude residue was purified by flash column chromatography (LP/EtOAc) with, unless otherwise noted, one of the following setups: Gradient A: 1% EtOAc isocratic for 5min, then setting up a gradient which varies the solvents from 1% to 10% EtOAc within 1 hour. Gradient B: 1% EtOAc isocratic for 5min, then setting up a gradient which varies the solvents from 1% to 20% EtOAc within 1 hour. Flow rate was set to 30 ml/min for all separations.

### 2.3. Optimization process for alkylation reactions using quaternary ammonium salts

The experiments were performed on a 0.50 mmol scale with an initial concentration of 0.25 mol/l of benzylamine **1** in toluene.

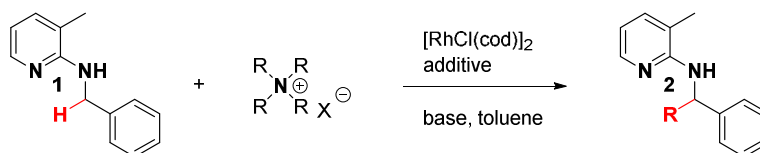

Table 1. Screening results for C-H alkylation using quaternary ammonium salts

| Entry    | R      | Base                                     | Additives                                | Catalyst (mol%) | Temp [°C] <sup>a</sup> | Time [h] | Conversion to <b>2</b> [%] <sup>b</sup> |
|----------|--------|------------------------------------------|------------------------------------------|-----------------|------------------------|----------|-----------------------------------------|
| <b>1</b> | ethyl  | K <sub>2</sub> CO <sub>3</sub> (3.5 eq.) | Ag <sub>2</sub> CO <sub>3</sub> (5 mol%) | 5               | 140                    | 28       | 80                                      |
| <b>2</b> | propyl | K <sub>2</sub> CO <sub>3</sub> (3.5 eq.) | Ag <sub>2</sub> CO <sub>3</sub> (5 mol%) | 5               | 140                    | 28       | 3 <sup>c</sup>                          |

|    |        |                                            |                                          |                 |     |    |                 |
|----|--------|--------------------------------------------|------------------------------------------|-----------------|-----|----|-----------------|
| 3  | butyl  | K <sub>2</sub> CO <sub>3</sub> (3.5 eq.)   | Ag <sub>2</sub> CO <sub>3</sub> (5 mol%) | 5               | 140 | 28 | 3               |
| 4  | pentyl | K <sub>2</sub> CO <sub>3</sub> (3.5 eq.)   | Ag <sub>2</sub> CO <sub>3</sub> (5 mol%) | 5               | 140 | 28 | 11 <sup>d</sup> |
| 5  | hexyl  | K <sub>2</sub> CO <sub>3</sub> (3.5 eq.)   | Ag <sub>2</sub> CO <sub>3</sub> (5 mol%) | 5               | 140 | 28 | 3 <sup>d</sup>  |
| 6  | octyl  | K <sub>2</sub> CO <sub>3</sub> (3.5 eq.)   | Ag <sub>2</sub> CO <sub>3</sub> (5 mol%) | 5               | 140 | 28 | 7 <sup>d</sup>  |
| 7  | butyl  | K <sub>2</sub> CO <sub>3</sub> (3.5 eq.)   | Ag <sub>2</sub> CO <sub>3</sub> (5 mol%) | 5               | 160 | 28 | 4               |
| 8  | butyl  | C <sub>4</sub> H <sub>9</sub> KO (3.5 eq.) | Ag <sub>2</sub> CO <sub>3</sub> (5 mol%) | 5               | 140 | 28 | 24              |
| 9  | butyl  | NaH (3.5 eq.)                              | Ag <sub>2</sub> CO <sub>3</sub> (5 mol%) | 5               | 140 | 28 | traces          |
| 10 | butyl  | NaOH (3.5 eq.)                             | Ag <sub>2</sub> CO <sub>3</sub> (5 mol%) | 5               | 140 | 28 | 56              |
| 11 | butyl  | KOH (3.5 eq.)                              | Ag <sub>2</sub> CO <sub>3</sub> (5 mol%) | 5               | 140 | 28 | 72              |
| 12 | butyl  | KOH (3.5 eq.)                              | -                                        | 5               | 140 | 28 | 71              |
| 13 | butyl  | KOH (0.5 eq.)                              | -                                        | 5               | 140 | 3  | 11              |
| 14 | butyl  | KOH (1 eq.)                                | -                                        | 5               | 140 | 3  | 14              |
| 15 | butyl  | KOH (2 eq.)                                | -                                        | 5               | 140 | 3  | 42              |
| 16 | butyl  | KOH (3 eq.)                                | -                                        | 5               | 140 | 3  | 72              |
| 17 | butyl  | KOH (3 eq.)                                | -                                        | 5               | 160 | 3  | 70              |
| 18 | butyl  | KOH (3 eq.)                                | -                                        | 5 + 5 after 3 h | 140 | 6  | 73              |
| 19 | butyl  | KOH (3 eq.)                                | -                                        | 7,5             | 140 | 3  | 71              |
| 20 | butyl  | KOH (3 eq.)                                | -                                        | 10              | 140 | 3  | 72              |

General reaction conditions: benzylic amine **1** (1 equiv.), tetraalkylammonium salt (1 equiv.), additive Ag<sub>2</sub>CO<sub>3</sub> (3.5 equiv.), base (3.5 equiv.), catalyst [RhCl(cod)]<sub>2</sub> (5 mol%), toluene (2 ml), 140 °C, Ar.

<sup>a</sup> Reaction block temperatures and not inside temperatures of the reaction mixtures. <sup>b</sup> Yields determined by GC-Analysis. <sup>c,d</sup> The conversion is determined relative to dodecane as internal standard assuming the compound has the same conversion factor as the ethylated<sup>c</sup> or butylated<sup>d</sup> product, which have been calibrated.

## 2.4. Influence of Counterions

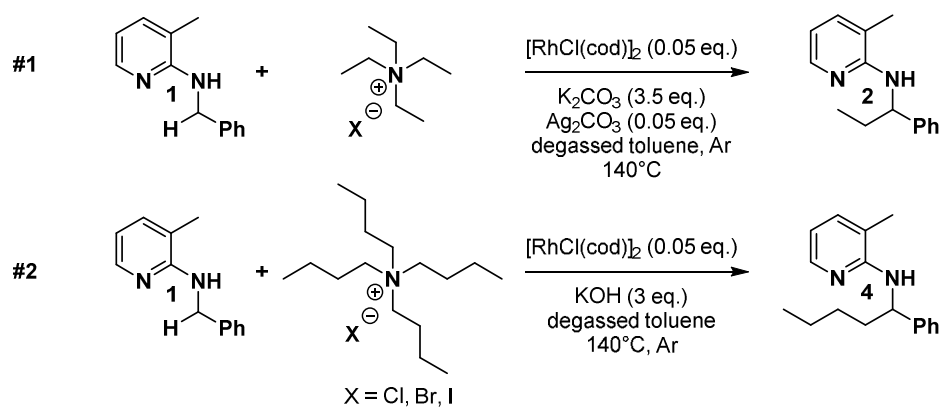

Table 2: Experiments were performed to check the influence of the counterion of the quaternary ammonium salt. At the beginning of the screening with the starting conditions (#1), and after the reaction conditions have been optimized (#2).

| Entry | Reaction | X        | Conversion to Product [%] <sup>a</sup> | Consumption of 1 [%] <sup>a</sup> |
|-------|----------|----------|----------------------------------------|-----------------------------------|
| 1     | #1       | chloride | 78.4                                   | 89.1                              |
| 2     | #1       | bromide  | 79.0                                   | 89.2                              |
| 3     | #1       | iodide   | 78.3                                   | 88.7                              |
| 4     | #2       | chloride | 72.0                                   | 86.3                              |
| 5     | #2       | bromide  | 72.1                                   | 85.9                              |
| 6     | #2       | iodide   | 70.2                                   | 87.0                              |

<sup>a</sup> Determined by GC-Analysis. The conversion is determined relative to dodecane as internal standard.

Before (Table 1, entries 1-3) and after the reaction conditions were optimized (Table 1, entries 4-6), these different counterions have been tested. No significant influence on the reaction outcome could be detected. All 3 counterions showed similar yields and starting material consumption.

### 3. Synthetic Procedures

#### 3.1. Precursor Synthesis

##### 3.1.1. N-Benzyl-3-methylpyridin-2-amine (1)

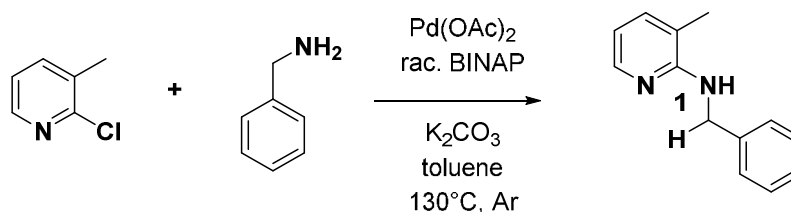

Pd(OAc)<sub>2</sub> (67 mg, 0.3 mmol, 0.02 eq.), rac. BINAP (187 mg, 0.3 mmol, 0.02 eq.) and K<sub>2</sub>CO<sub>3</sub> (7.256 g, 52.5 mmol, 3.5 eq.) were placed in a 100 ml 3-necked-flask, evacuated, and flushed with argon 3 times. Then 2-chloro-3-methylpyridine (1.64 ml, 15 mmol, 1 eq.), freshly distilled benzylamine (1.97 ml, 18 mmol, 1.2 eq.) and finally toluene (38 ml) were added through the septum with a syringe. The mixture was heated to 130 °C maintaining the argon atmosphere with a balloon. The reaction was stopped after 18 h (TLC). After cooling to r.t. the solid material was removed by filtration and washed with CH<sub>2</sub>Cl<sub>2</sub> (150 ml). The combined organic layers were evaporated and the resulting crude product was purified by flash column chromatography (LP/EtOAc) starting with 3 % EtOAc. The pure product was dried under reduced pressure and isolated in 92% yield.

Analytical data is in accordance to literature.<sup>[44]</sup>

**N-Benzyl-3-methylpyridin-2-amine (1)** Colorless to beige solid (2.736 g, 92%)

<sup>1</sup>H-NMR (400 MHz, CDCl<sub>3</sub>): δ = 2.09 (s, 3H, C[7a]-H<sub>3</sub>), 4.37 (s, 1H, N[1]-H), 4.70 (d, J = 5.3 Hz, 2H, C[2]-H<sub>2</sub>), 6.57 (dd, J = 7.1, 5.1 Hz, 1H, C[5a]-H), 7.23 – 7.44 (m, 6H, C[4a]-H, C[2-6b]-H), 8.06 (dd, J = 5.1, 1.7 Hz, 1H, C[6a]-H).

<sup>13</sup>C-NMR (101 MHz, CDCl<sub>3</sub>): δ = 17.1 (q, C[7a]), 46.0 (t, C[2]), 113.0 (d, C[5a]), 116.7 (s, C[3a]),

127.3 (d, C[4b]), 128.0 (d, C[2b]; C[6b]), 128.7 (d, C[3b]; C[5b]), 137.0 (d, C[4a]), 140.1 (s, C[1b]), 145.5 (d, C[6a]), 156.7 (s, C[2a]).

**MP:** 48-49 °C

**TLC:** 0.51 (LP/EtOAc 5:1)

### 3.1.2. N-Benzyl-3-chloropyridin-2-amine (21)

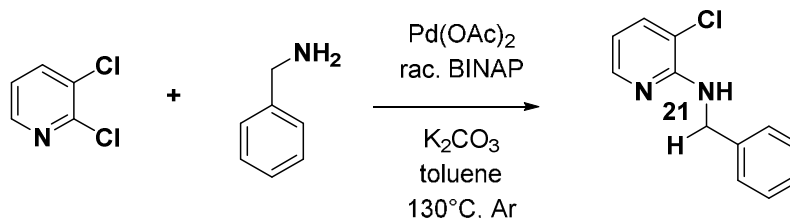

Pd(OAc)<sub>2</sub> (67 mg, 0.3 mmol, 0.02 eq.), rac. BINAP (187 mg, 0.3 mmol, 0.02 eq.) and K<sub>2</sub>CO<sub>3</sub> (7.256 g, 52.5 mmol, 3.5 eq.) were placed in a 100 ml 3-neck-flask and evacuated and flushed with Argon 3 times. Then 2,3-dichloropyridine (2.22 g, 15 mmol, 1 eq.), freshly distilled benzylamine (1.97 ml, 18 mmol, 1.2 eq.) and finally toluene (38 ml) were added. The mixture was heated to 130 °C maintaining the argon atmosphere with a balloon. The reaction was stopped after 16 h (TLC). After cooling to r.t. the solid material was removed by filtration and washed with CH<sub>2</sub>Cl<sub>2</sub> (150 ml). The combined organic layers were evaporated and the resulting crude product was purified by flash column chromatography (LP/EtOAc) starting with 3 % EtOAc. The pure product was dried under reduced pressure and isolated in 90% yield.

Analytical data is in accordance with literature.<sup>[45]</sup>

**N-Benzyl-3-chloropyridin-2-amine (21)** Yellow oil (2.95 g, 90 %)

**<sup>1</sup>H-NMR (400 MHz, CDCl<sub>3</sub>):** δ = 4.68 (d, J = 5.6 Hz, 2H, C[2]-H<sub>2</sub>), 5.28 (s, 1H, N[1]-H), 6.56 (dd, J = 7.7, 4.9 Hz, 1H, C[5a]-H), 7.26 – 7.41 (m, 5H, C[2-6b]-H), 7.47 (dd, J = 7.6, 1.6 Hz, 1H, C[4a]-H), 8.06 (dd, J = 4.9, 1.6 Hz, 1H, C[6a]-H).

**<sup>13</sup>C-NMR (101 MHz, CDCl<sub>3</sub>):** δ = 45.6 (t, C[2]), 113.2 (d, C[5a]), 115.5 (s, C[3a]), 127.4 (d, C[4b]), 127.8 (d, C[2b]; C[6b]), 128.8 (d, C[3b]; C[5b]), 136.2 (d, C[4a]), 139.4 (s, C[1b]), 146.2 (d, C[6a]), 154.0 (s, C[2a]).

**TLC:** 0.65 (LP/EtOAc 5:1)

### 3.1.3. N-Benzyl-3-phenylpyridin-2-amine (22)

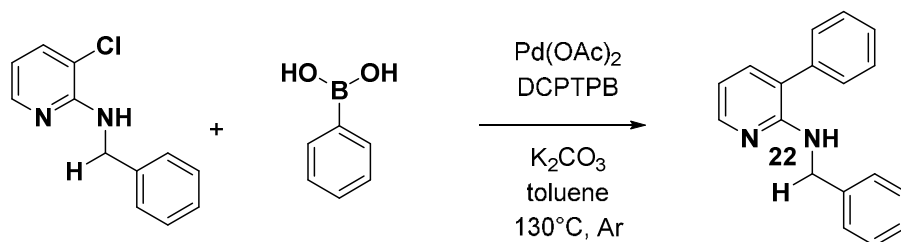

N-Benzyl-3-chloropyridin-2-amine (1.095 g, 5 mmol, 1 eq.), phenylboronic acid (1.830 g, 15 mmol, 3 eq.), K<sub>2</sub>CO<sub>3</sub> (1.380 g, 10 mmol, 2 eq.), Pd(OAc)<sub>2</sub> (20 mg, 0.1 mmol, 0.02 eq.) and DCPTPB (50 mg, 0.1 mmol, 0.02 eq.) were placed in a 100 ml 3-necked-flask. The flask was evacuated and flushed with argon 3 times. The mixture was heated to 130 °C maintaining the argon atmosphere with a balloon. The reaction was stopped after 16 h (TLC). After cooling to r.t. the solid material was removed by filtration and washed with CH<sub>2</sub>Cl<sub>2</sub> (100 ml). The combined organic layers were evaporated and the resulting crude product was purified by flash column chromatography (LP/EtOAc) starting with 5 % EtOAc. The pure product was dried under reduced pressure and isolated in 87% yield.

Analytical data is in accordance with literature.<sup>[33]</sup>

**N-Benzyl-3-phenylpyridin-2-amine (22)** Colorless to beige solid (1.13 g, 87 %)

**<sup>1</sup>H-NMR (400 MHz, CDCl<sub>3</sub>):** δ = 4.67 (d, J = 5.6 Hz, 2H, C[2]-H<sub>2</sub>), 4.91 (s, 1H, N[1]-H), 6.69 (dd, J = 7.2, 5.1 Hz, 1H, C[5a]-H), 7.20 – 7.48 (m, 11H, C[4a]-H; C[2-6b]-H; C[2-6c]-H), 8.16 (dd, J = 5.1, 1.8 Hz, 1H, C[6a]-H).

**<sup>13</sup>C-NMR (101 MHz, CDCl<sub>3</sub>):** δ = 45.7 (t, C[2]), 113.1 (d, C[5a]), 122.5 (s, C[3a]), 127.1 (d, C[4b]), 127.6 (d, C[2b]; C[6b]), 127.9 (d, C[2c]; C[6c]), 128.6 (d, C[3b]; C[5b]), 129.0 (d, C[4c]), 129.4 (d, C[3c]; C[5c]), 137.4 (d, C[4a]), 137.9 (s, C[1c]), 140.0 (s, C[1b]), 147.0 (d, C[6a]), 155.4 (s, C[2a]).

**MP:** 58-60 °C

**TLC:** 0.80 (LP/EtOAc 5:1)

### 3.2. Substrate Scope – Tetraalkylammonium Salts

Unless otherwise noted, experiments were performed on a 0.50 mmol scale with an initial concentration of 0.25 mol/l of **1** in the reaction mixture.

#### 3.2.1. 3-Methyl-N-(1-phenylpropyl)pyridin-2-amine (**2**)

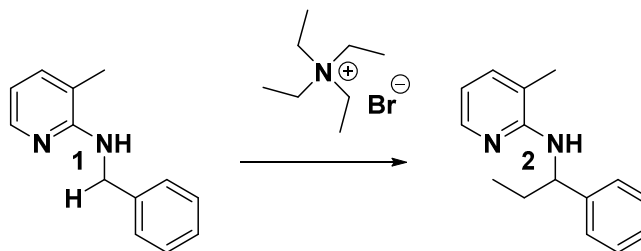

The reaction was carried out according to general procedure A with **1** (100 mg, 0.50 mmol, 1 eq.), tetraethylammonium bromide (105 mg, 0.50 mmol, 1 eq.), KOH (84 mg, 1.50 mmol, 3 eq.) and [RhCl(cod)]<sub>2</sub> (12 mg, 0.025 mmol, 0.05 eq.) in dry and degassed toluene (2 ml). The reaction mixture was heated for 16 h at 140 °C. The general work-up procedure B for C-H activation reactions was followed using gradient A. Product **2** was isolated in 68 % yield.

**3-Methyl-N-(1-phenylpropyl)pyridin-2-amine (**2**)** Colorless solid (77 mg, 68 %).

**<sup>1</sup>H-NMR (400 MHz, CDCl<sub>3</sub>):** δ = 0.94 (t, J = 7.4 Hz, 3H, C[4]-H<sub>3</sub>), 1.82 – 2.04 (m, 2H, C[3]-H<sub>2</sub>), 2.12 (s, 3H, C[7a]-H<sub>3</sub>), 4.40 (d, J = 7.7 Hz, 1H, N[1]-H), 5.19 (q, J = 7.2 Hz, 1H, C[2]-H), 6.48 (dd, J = 7.1, 5.1 Hz, 1H, C[5a]-H), 7.17 – 7.41 (m, 6H, C[4a]-H, C[2-6b]-H), 7.97 (dd, J = 5.1, 1.7 Hz, 1H, C[6a]-H).

**<sup>13</sup>C-NMR (101 MHz, CDCl<sub>3</sub>):** δ = 10.9 (q, C[4]), 17.2 (q, C[7a]), 30.3 (t, C[3]), 56.1 (d, C[2]), 112.7 (d, C[5a]), 116.4 (s, C[3a]), 126.7 (d, C[2b]), 126.9 (d, C[6b]), 127.7 (d, C[4b]), 128.5 (d, C[3b]), 128.6 (d, C[5b]), 136.9 (d, C[4a]), 144.3 (s, C[1b]), 145.6 (d, C[6a]), 156.3 (s, C[2a]).

**MP:** 41.5-42.5 °C

**TLC:** 0.54 (LP/EtOAc 5:1)

**GCMS:** Retention time: 6.55 min. Main fragments: 226 (M<sup>+</sup>, 20), 211 (8), 197 (100), 108 (22), 92 (42), 65 (35).

**HRMS:** calculated for C<sub>15</sub>H<sub>19</sub>N<sub>2</sub> [M+H]<sup>+</sup> 227.1543; found 227.1554; Δ = 5.22 ppm.

### 3.2.2. 3-Methyl-N-(1-phenylbutyl)pyridin-2-amine (3)

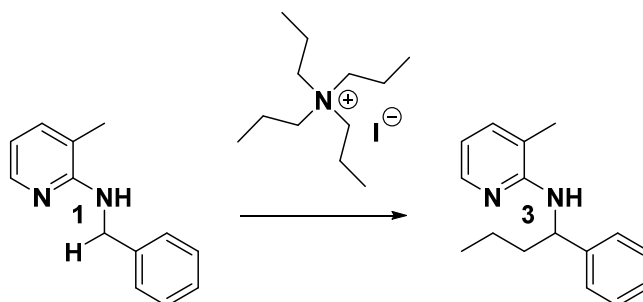

The reaction was carried out according to general procedure A with **1** (100 mg, 0.50 mmol, 1 eq.), tetrapropylammonium iodide (157 mg, 0.50 mmol, 1 eq.), KOH (84 mg, 1.50 mmol, 3 eq.) and [RhCl(cod)]<sub>2</sub> (12 mg, 0.025 mmol, 0.05 eq.) in dry and degassed toluene (2 ml). The reaction mixture was heated for 16 h at 140 °C. The general work-up procedure B for C-H activation reactions was followed using gradient A. Product **3** was isolated in 62 % yield.

**3-Methyl-N-(1-phenylbutyl)pyridin-2-amine (3)** Colorless oil (75 mg, 62 %).

**<sup>1</sup>H-NMR (400 MHz, CDCl<sub>3</sub>):**  $\delta$  = 0.85 (t,  $J$  = 7.4 Hz, 3H, C[5]-H<sub>3</sub>), 1.16 – 1.43 (m, 2H, C[4]-H<sub>2</sub>), 1.68 – 1.88 (m, 2H, C[3]-H<sub>2</sub>), 2.02 (s, 3H, C[7a]-H<sub>3</sub>), 4.29 (d,  $J$  = 7.7 Hz, 1H, N[1]-H), 5.18 (q,  $J$  = 7.4 Hz, 1H, C[2]-H), 6.37 (dd,  $J$  = 7.1, 5.0 Hz, 1H, C[5a]-H), 7.06 – 7.33 (m, 6H, C[4a]-H, C[2-6b]-H), 7.87 (dd,  $J$  = 5.2, 1.8 Hz, 1H, C[6a]-H).

**<sup>13</sup>C-NMR (101 MHz, CDCl<sub>3</sub>):**  $\delta$  = 14.2 (q, C[5]), 17.2 (q, C[7a]), 19.7 (t, C[4]), 39.9 (t, C[3]), 54.5 (d, C[2]), 112.6 (d, C[5a]), 116.2 (s, C[3a]), 126.6 (d, C[2b; 6b]), 126.8 (d, C[4b]), 128.5 (d, C[3b; 5b]), 136.8 (d, C[4a]), 144.7 (s, C[1b]), 145.7 (d, C[6a]), 156.3 (s, C[2a]).

**TLC:** 0.57 (LP/EtOAc 5:1)

**GCMS:** Retention time: 6.77 min. Main fragments: 240 (M<sup>+</sup>, 12), 211 (20), 197 (100), 108 (28), 92 (41), 65 (24).

**HRMS:** calculated for C<sub>16</sub>H<sub>21</sub>N<sub>2</sub> [M+H]<sup>+</sup> 241.1699; found 241.1698;  $\Delta$  = 0.49 ppm.

### 3.2.3. 3-Methyl-N-(1-phenylpentyl)pyridin-2-amine (4)

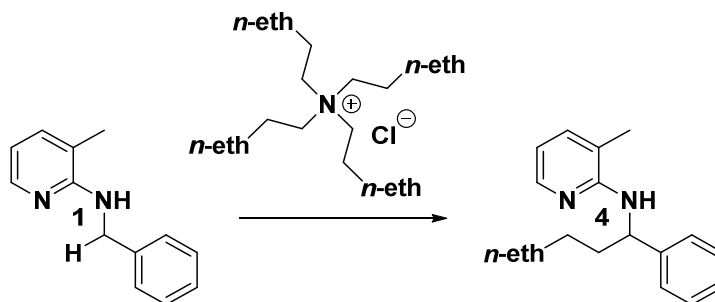

The reaction was carried out according to general procedure A with **1** (100 mg, 0.50 mmol, 1 eq.), tetrabutylammonium chloride (139 mg, 0.50 mmol, 1 eq.), KOH (84 mg, 1.50 mmol, 3 eq.) and [RhCl(cod)]<sub>2</sub> (12 mg, 0.025 mmol, 0.05 eq.) in dry and degassed toluene (2 ml). The reaction mixture was heated for 16 h at 140 °C. The general work-up procedure B for C-H activation reactions was followed using gradient B. Product **4** was isolated in 60 % yield.

**3-Methyl-N-(1-phenylpentyl)pyridin-2-amine (4)** Colorless oil ( 76 mg, 60 %).

**<sup>1</sup>H-NMR (400 MHz, CDCl<sub>3</sub>):** δ = 0.88 (t, J = 7.1 Hz, 3H, C[6]-H<sub>3</sub>), 1.24 – 1.43 (m, 4H, C[4-5]-H<sub>2</sub>), 1.80 – 1.99 (m, 2H, C[3]-H<sub>2</sub>), 2.12 (s, 3H, C[7a]-H<sub>3</sub>), 4.38 (d, J = 7.7 Hz, 1H, N[1]-H), 5.25 (q, J = 7.3 Hz, 1H, C[2]-H), 6.47 (dd, J = 7.1, 5.0 Hz, 1H, C[5a]-H), 7.16 – 7.40 (m, 6H, C[4a]-H, C[2-6b]-H), 7.96 (dd, J = 5.1, 1.7 Hz, 1H, C[6a]-H).

**<sup>13</sup>C-NMR (101 MHz, CDCl<sub>3</sub>):** δ = 14.1 (q, C[6]), 17.2 (q, C[7a]), 22.8 (t, C[5]), 28.7 (t, C[4]), 37.4 (t, C[3]), 54.7 (d, C[2]), 112.6 (d, C[5a]), 116.3 (s, C[3a]), 126.6 (d, C[2b; 6b]), 126.8 (d, C[4b]), 128.5 (d, C[3b; 5b]), 136.9 (d, C[4a]), 144.7 (s, C[1b]), 145.7 (d, C[6a]), 156.3 (s, C[2a]).

**TLC:** 0.60 (LP/EtOAc 5:1)

**GCMS:** Retention time: 7.01 min. Main fragments: 254 (M<sup>+</sup>, 13), 211 (20), 197 (100), 108 (30), 92 (43), 65 (22).



### 3.2.4. 3-Methyl-N-(1-phenylhexyl)pyridin-2-amine (5)

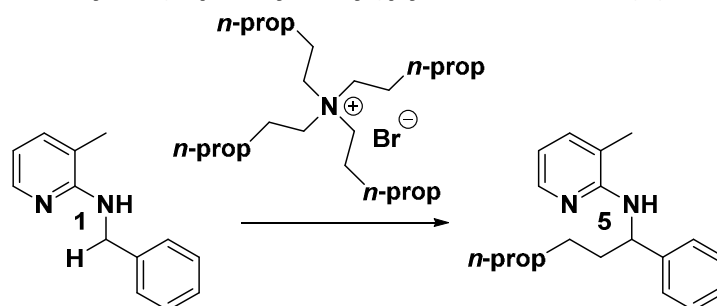

The reaction was carried out according to general procedure A with **1** (100 mg, 0.50 mmol, 1 eq.), tetrapentylammonium bromide (189 mg, 0.50 mmol, 1 eq.), KOH (84 mg, 1.50 mmol, 3 eq.) and  $[\text{RhCl}(\text{cod})]_2$  (12 mg, 0.025 mmol, 0.05 eq.) in dry and degassed toluene (2 ml). The reaction mixture was heated for 16 h at 140 °C. The general work-up procedure B for C-H activation reactions was followed using gradient B. Product **5** was isolated in 58 % yield.

**3-Methyl-N-(1-phenylhexyl)pyridin-2-amine (5)** Colorless solid ( 78 mg, 58 %).

**$^1\text{H-NMR}$  (400 MHz,  $\text{CDCl}_3$ ):**  $\delta$  = 0.86 (d,  $J$  = 6.9 Hz, 3H, C[7]-H<sub>3</sub>), 1.24 – 1.45 (m, 6H, C[4-6]-H<sub>2</sub>), 1.78 – 1.97 (m, 2H, C[3]-H<sub>2</sub>), 2.12 (s, 3H, C[7a]-H<sub>3</sub>), 4.38 (d,  $J$  = 7.6 Hz, 1H, N[1]-H), 5.25 (q,  $J$  = 7.3 Hz, 1H, C[2]-H), 6.47 (dd,  $J$  = 7.1, 5.1 Hz, 1H, C[5a]-H), 7.17 – 7.40 (m, 6H, C[4a]-H, C[2-6b]-H), 7.96 (dd,  $J$  = 5.1, 1.7 Hz, 1H, C[6a]-H).

**$^{13}\text{C-NMR}$  (101 MHz,  $\text{CDCl}_3$ ):**  $\delta$  = 14.2 (q, C[7]), 17.2 (q, C[7a]), 22.7 (t, C[6]), 26.2 (t, C[5]), 31.9 (t, C[4]), 37.6 (t, C[3]), 54.8 (d, C[2]), 112.6 (d, C[5a]), 116.3 (s, C[3a]), 126.6 (d, C[2b; 6b]), 126.8 (d, C[4b]), 128.5 (d, C[3b; 5b]), 136.9 (d, C[4a]), 144.7 (s, C[1b]), 145.7 (d, C[6a]), 156.3 (s, C[2a]).

**MP:** 40-41 °C

**TLC:** 0.60 (LP/EtOAc 5:1)

**GCMS:** Retention time: 7.28 min. Main fragments: 268 ( $\text{M}^+$ , 8), 211 (19), 197 (100), 108 (31), 92 (27), 65 (20).

**HRMS:** calculated for  $\text{C}_{18}\text{H}_{25}\text{N}_2$  [ $\text{M}+\text{H}$ ]<sup>+</sup> 269.2012; found 269.2033;  $\Delta$  = 7.79 ppm.

### 3.2.5. 3-Methyl-N-(1-phenylheptyl)pyridin-2-amine (6)

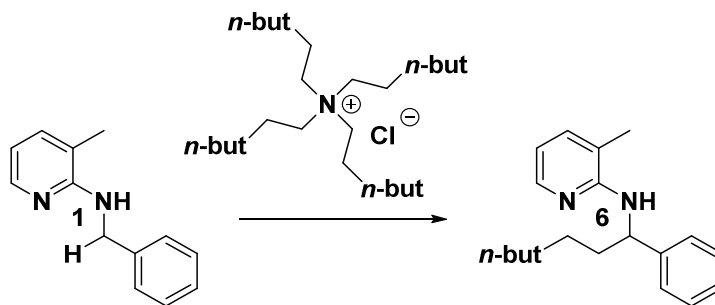

The reaction was carried out according to general procedure A with **1** (100 mg, 0.50 mmol, 1 eq.), tetrahexylammonium chloride (195 mg, 0.50 mmol, 1 eq.), KOH (84 mg, 1.50 mmol, 3 eq.) and [RhCl(cod)]<sub>2</sub> (12 mg, 0.025 mmol, 0.05 eq.) in dry and degassed toluene (2 ml). The reaction mixture was heated for 16 h at 140 °C. The general work-up procedure B for C-H activation reactions was followed using gradient B. Product **6** was isolated in 61 % yield.

**3-Methyl-N-(1-phenylheptyl)pyridin-2-amine (6)** Colorless oil ( 86 mg, 61 %).

**<sup>1</sup>H-NMR (400 MHz, CDCl<sub>3</sub>):**  $\delta$  = 0.87 (t, *J* = 6.7 Hz, 3H, C[8]-H<sub>3</sub>), 1.23 – 1.45 (m, 8H, C[4-7]-H<sub>2</sub>), 1.80 – 1.99 (m, 2H, C[3]-H<sub>2</sub>), 2.13 (s, 3H, C[7a]-H<sub>3</sub>), 4.39 (d, *J* = 7.7 Hz, 1H, N[1]-H), 5.26 (q, *J* = 7.3 Hz, 1H, C[2]-H), 6.48 (dd, *J* = 7.1, 5.0 Hz, 1H, C[5a]-H), 7.14 – 7.45 (m, 6H, C[4a]-H, C[2-6b]-H), 7.97 (dd, *J* = 5.1, 1.8 Hz, 1H, C[6a]-H).

**<sup>13</sup>C-NMR (101 MHz, CDCl<sub>3</sub>):**  $\delta$  = 14.2 (q, C[8]), 17.2 (q, C[7a]), 22.7 (t, C[7]), 26.5 (t, C[6]), 29.4 (t, C[5]), 31.9 (t, C[4]), 37.7 (t, C[3]), 54.7 (d, C[2]), 112.6 (d, C[5a]), 116.2 (s, C[3a]), 126.6 (d, C[2b; 6b]), 126.8 (d, C[4b]), 128.5 (d, C[3b; 5b]), 136.8 (d, C[4a]), 144.7 (s, C[1b]), 145.7 (d, C[6a]), 156.3 (s, C[2a]).

**TLC:** 0.63 (LP/EtOAc 5:1)

**GCMS:** Retention time: 7.54 min. Main fragments: 282 (M<sup>+</sup>, 7), 211 (17), 197 (100), 108 (32), 92 (30), 65 (14).

### 3.2.6. 3-Methyl-N-(1-phenylnonyl)pyridin-2-amine (7)

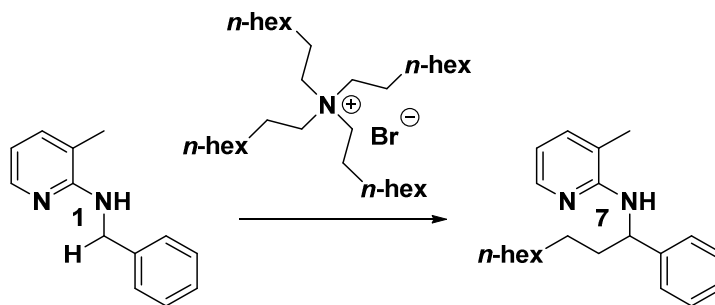

The reaction was carried out according to general procedure A with **1** (100 mg, 0.50 mmol, 1 eq.), tetraoctylammonium bromide (273 mg, 0.50 mmol, 1 eq.), KOH (84 mg, 1.50 mmol, 3 eq.) and [RhCl(cod)]<sub>2</sub> (12 mg, 0.025 mmol, 0.05 eq.) in dry and degassed toluene (2 ml). The reaction mixture was heated for 84 h at 140 °C. The general work-up procedure B for C-H activation reactions was followed using gradient B. Product **7** was isolated in 40 % yield.

**3-Methyl-N-(1-phenylnonyl)pyridin-2-amine (7)** Colorless oil ( 63 mg, 40 %).

**<sup>1</sup>H-NMR (400 MHz, CDCl<sub>3</sub>):**  $\delta$  = 0.87 (t, *J* = 6.8 Hz, 3H, C[9]-H<sub>3</sub>), 1.22 – 1.43 (m, 12H, C[4-8]-H<sub>2</sub>), 1.79 – 1.97 (m, 2H, C[3]-H<sub>2</sub>), 2.12 (s, 3H, C[7a]-H<sub>3</sub>), 4.38 (d, *J* = 7.7 Hz, 1H, N[1]-H), 5.25 (q, *J* = 7.3 Hz, 1H, C[2]-H), 6.47 (dd, *J* = 7.1, 5.1 Hz, 1H, C[5a]-H), 7.14 – 7.42 (m, 6H, C[4a]-H, C[2-6b]-H), 7.96 (dd, *J* = 5.1, 1.7 Hz, 1H, C[6a]-H).

**<sup>13</sup>C-NMR (101 MHz, CDCl<sub>3</sub>):**  $\delta$  = 14.2 (q, C[9]), 17.2 (q, C[7a]), 22.8 (t, C[8]), 26.5 (t, C[7]), 29.4 (t, C[6]), 29.7 (t, C[5]), 32.0 (t, C[4]), 37.7 (t, C[3]), 54.7 (d, C[2]), 112.6 (d, C[5a]), 116.3 (s, C[3a]), 126.6 (d, C[2b; 6b]), 126.8 (d, C[4b]), 128.5 (d, C[3b; 5b]), 136.9 (d, C[4a]), 144.7 (s, C[1b]), 145.7 (d, C[6a]), 156.3 (s, C[2a]).

**TLC:** 0.63 (LP/EtOAc 5:1)

**GCMS:** Retention time: 8.07 min. Main fragments: 310 (M<sup>+</sup>, 5), 211 (17), 197 (100), 108 (33), 92 (28), 65 (10).

**HRMS:** calculated for C<sub>21</sub>H<sub>31</sub>N<sub>2</sub> [M+H]<sup>+</sup> 311.2482; found 311.2505;  $\Delta$  = 7.53 ppm.

### 3.3. Substrate Scope – Target Compound

#### 3.3.1. 3-phenyl-N-(1-phenylpropyl)pyridin-2-amine (8)

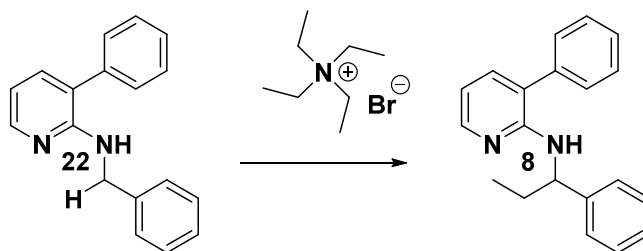

The reaction was carried out according to general procedure A with N-benzyl-3-phenylpyridin-2-amine (**22**) (130 mg, 0.50 mmol, 1 eq.), tetraethylammonium bromide (105 mg, 0.50 mmol, 1 eq.), KOH (84 mg, 1.50 mmol, 3 eq.) and [RhCl(cod)]<sub>2</sub> (12 mg, 0.025 mmol, 0.05 eq.) in dry and degassed toluene (2 ml). The reaction mixture was heated for 16 h at 140 °C. The general work-up procedure B for C-H activation reactions was followed using gradient A. Product **8** was isolated in 63 % yield.

**3-Phenyl-N-(1-phenylpropyl)pyridin-2-amine (8)** Yellowish oil (91 mg, 63 %).

**<sup>1</sup>H-NMR (400 MHz, CDCl<sub>3</sub>):**  $\delta$  = 0.85 (t,  $J$  = 7.4 Hz, 3H, C[4]-H<sub>3</sub>), 1.72 – 1.84 (m, 2H, C[3]-H<sub>2</sub>), 4.88 (d,  $J$  = 8.0 Hz, 1H, N[1]-H), 5.14 (q,  $J$  = 7.2 Hz, 1H, C[2]-H), 6.59 (dd,  $J$  = 7.2, 5.1 Hz, 1H, C[5a]-H), 7.17 – 7.50 (m, 11H, C[4a]-H, C[2-6b]-H, C[2-6C]-H), 8.05 (dd,  $J$  = 5.0, 1.8 Hz, 1H, C[6a]-H).

**<sup>13</sup>C-NMR (101 MHz, CDCl<sub>3</sub>):**  $\delta$  = 10.9 (q, C[4]), 30.3 (t, C[3]), 56.2 (d, C[2]), 112.7 (d, C[5a]), 122.4 (s, C[3a]), 126.6 (d, C[4b]), 128.0 (d, C[2c; 6c]), 128.4 (d, C[2b; 6b]), 128.6 (d, C[4c]), 129.0 (d, C[3b; 5b]), 129.4 (d, C[3c; 5c]), 137.2 (s, C[4a]), 138.2 (d, C[1c]), 144.1 (s, C[1b]), 147.1 (d, C[6a]), 155.0 (s, C[2a]).

**TLC:** 0.57 (LP/EtOAc 5:1)

**GCMS:** Retention time: 7.80 min. Main fragments: 288 ( $M^+$ , 11), 259 (100), 181 (26), 154 (21), 129 (27), 127 (36), 115 (12), 91 (28), 77 (11).

**HRMS:** calculated for C<sub>20</sub>H<sub>21</sub>N<sub>2</sub> [ $M+H$ ]<sup>+</sup> 289.1699; found 289.1704;  $\Delta$  = 2.06 ppm.

### 3.3.2. 3-Phenyl-N-(1-(4-methylphenyl)propyl)pyridin-2-amine (9)

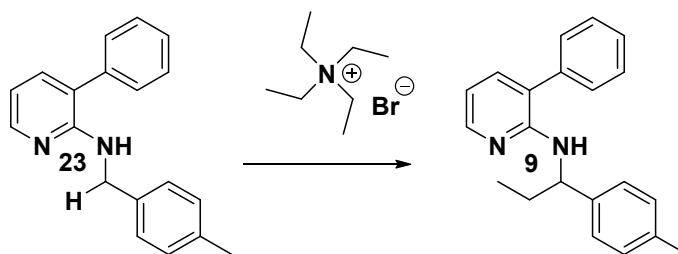

The reaction was carried out according to general procedure A with N-(4-methylbenzyl)-3-phenylpyridin-2-amine (**23**) (137 mg, 0.50 mmol, 1 eq.), tetraethylammonium bromide (105 mg, 0.50 mmol, 1 eq.), KOH (84 mg, 1.50 mmol, 3 eq.) and [RhCl(cod)]<sub>2</sub> (12 mg, 0.025 mmol, 0.05 eq.) in dry and degassed toluene (2 ml). The reaction mixture was heated for 16 h at 140 °C. The general work-up procedure B for C-H activation reactions was followed using gradient A. Product **9** was isolated in 65 % yield.

**3-Phenyl-N-(1-(4-methylphenyl)propyl)pyridin-2-amine (9)** Yellowish oil (98 mg, 65 %).

**<sup>1</sup>H-NMR (400 MHz, CDCl<sub>3</sub>):**  $\delta$  = 0.86 (t, *J* = 7.4 Hz, 3H, C[4]-H<sub>3</sub>), 1.27 (s, 1H, C[3]-H), 1.68 – 1.88 (m, 2H, C[3]-H<sub>2</sub>), 2.31 (s, 3H, C[7b]-H<sub>3</sub>), 4.87 (d, *J* = 7.4 Hz, 1H, N[1]-H), 5.12 (q, *J* = 7.3 Hz, 1H, C[2]-H), 6.60 (dd, *J* = 7.2, 5.0 Hz, 1H, C[5a]-H), 7.06 – 7.53 (m, 10H, C[4a]-H, C[2-3b;5-6b]-H, C[2-6C]-H), 8.07 (dd, *J* = 5.1, 1.8 Hz, 1H, C[6a]-H).

**<sup>13</sup>C-NMR (101 MHz, CDCl<sub>3</sub>):**  $\delta$  = 10.9 (q, C[4]), 21.2 (q, C[7b]), 29.9 (t, C[3]), 30.3 (t, C[3]), 56.0 (d, C[2]), 112.7 (d, C[5a]), 122.4 (s, C[3a]), 126.8 (d, C[2b; 6b]), 127.9 (d, C[2c; 6c]), 129.0 (d, C[4c]), 129.1 (d, C[3b; 5b]), 129.4 (d, C[3c; 5c]), 136.3 (d, C[4a]), 137.2 (s, C[4b]), 138.3 (d, C[1c]), 141.1 (s, C[1b]), 147.2 (d, C[6a]), 155.1 (s, C[2a]).

**TLC:** 0.57 (LP/EtOAc 5:1)

**GCMS:** Retention time: 8.05 min. Main fragments: 302 (M<sup>+</sup>, 12), 273 (100), 181 (30), 154 (24), 129 (27), 127 (32), 115 (12), 106 (28), 91 (13), 77 (10).

**HRMS:** calculated for C<sub>21</sub>H<sub>23</sub>N<sub>2</sub> [M+H]<sup>+</sup> 303.1856; found 303.1881;  $\Delta$  = 8.37 ppm.

### 3.3.3. 3-Mesityl-N-(1-phenylpropyl)pyridin-2-amine (10)

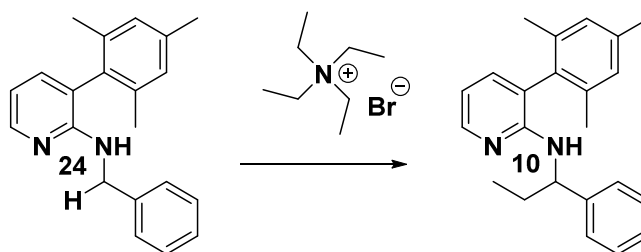

The reaction was carried out according to general procedure A with N-benzyl-3-mesitylpyridin-2-amine (**24**) (151 mg, 0.50 mmol, 1 eq.), tetraethylammonium bromide (105 mg, 0.50 mmol, 1 eq.), KOH (84 mg, 1.50 mmol, 3 eq.) and [RhCl(cod)]<sub>2</sub> (12 mg, 0.025 mmol, 0.05 eq.) in dry and degassed toluene (2 ml). The reaction mixture was heated for 16 h at 140 °C. The general work-up procedure B for C-H activation reactions was followed using gradient A. Product **10** was isolated in 64 % yield.

**3-Mesityl-N-(1-phenylpropyl)pyridin-2-amine (10)** Yellowish oil (106 mg, 64 %).

**<sup>1</sup>H-NMR (400 MHz, CDCl<sub>3</sub>):**  $\delta$  = 0.84 (t,  $J$  = 7.4 Hz, 3H, C[4]-H<sub>3</sub>), 1.60 – 1.79 (m, 2H, C[3]-H<sub>2</sub>), 1.91 (s, 3H, C[7c]-H<sub>3</sub>), 2.06 (s, 3H, C[9c]-H<sub>3</sub>), 2.36 (s, 3H, C[8c]-H<sub>3</sub>), 4.27 (s, 1H, N[1]-H), 5.15 (d,  $J$  = 7.7 Hz, 1H, C[2]-H), 6.61 (dd,  $J$  = 7.2, 5.1 Hz, 1H, C[5a]-H), 7.00 (d,  $J$  = 6.0 Hz, 2H, C[3c; 5c]), 7.10 (dd,  $J$  = 7.2, 1.9 Hz, 1H, C[4a]-H), 7.15 – 7.30 (m, 5H, C[2-6b]-H), 8.08 (dd,  $J$  = 5.1, 1.9 Hz, 1H, C[6a]-H).

**<sup>13</sup>C-NMR (101 MHz, CDCl<sub>3</sub>):**  $\delta$  = 10.9 (q, C[4]), 20.2, (q, C[7c]), 20.2, (q, C[9c]), 21.3 (q, C[8c]), 30.4 (t, C[3]), 55.8 (d, C[2]), 112.7 (d, C[5a]), 116.5 (s, C[3a]), 126.7 (d, C[4b]), 128.4 (d, C[2b; 6b]), 128.9 (d, C[3c; 5c]), 129.0 (d, C[3b; 5b]), 136.2 (d, C[4a]), 137.1 (s, C[1c]), 137.3 (s, C[2c; 6c]), 137.9 (s, C[4c]), 140.7 (s, C[1b]), 146.5 (d, C[6a]), 155.0 (s, C[2a]).

**TLC:** 0.61 (LP/EtOAc 5:1)

**GCMS:** Retention time: 7.99 min. Main fragments: 330 ( $M^+$ , 15), 301 (100), 209 (29), 197 (13), 181 (25), 143 (14), 91 (39).

**HRMS:** calculated for C<sub>23</sub>H<sub>27</sub>N<sub>2</sub> [ $M+H$ ]<sup>+</sup> 331.2169; found 331.2180;  $\Delta$  = 3.38 ppm.

### 3.3.4. 3-(4-Isopropoxyphenyl)-N-(1-phenylpropyl)pyridin-2-amine (11)

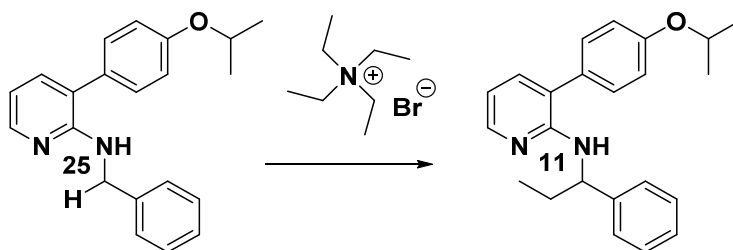

The reaction was carried out according to general procedure A with N-benzyl-3-(4-isopropoxyphenyl)pyridin-2-amine (**25**) (159 mg, 0.50 mmol, 1 eq.), tetraethylammonium bromide (105 mg, 0.50 mmol, 1 eq.), KOH (84 mg, 1.50 mmol, 3 eq.) and [RhCl(cod)]<sub>2</sub> (12 mg, 0.025 mmol, 0.05 eq.) in dry and degassed toluene (2 ml). The reaction mixture was heated for 16 h at 140 °C. The general work-up procedure B for C-H activation reactions was followed using gradient A. Product **11** was isolated in 59 % yield.

**3-(4-Isopropoxyphenyl)-N-(1-phenylpropyl)pyridin-2-amine (11)** Yellow oil (103 mg, 59 %).

**<sup>1</sup>H-NMR (400 MHz, CDCl<sub>3</sub>):**  $\delta$  = 0.86 (t, *J* = 7.4 Hz, 3H, C[4]-H<sub>3</sub>), 1.38 (d, *J* = 6.1 Hz, 6H, C[9-10c]-H<sub>3</sub>), 1.71 – 1.84 (m, 2H, C[3]-H<sub>2</sub>), 4.60 (p, *J* = 6.0 Hz, 1H, C[8c]-H), 4.90 (d, *J* = 8.0 Hz, 1H, N[1]-H), 5.14 (q, *J* = 7.2 Hz, 1H, C[2]-H), 6.56 (dd, *J* = 7.2, 5.1 Hz, 1H, C[5a]-H), 6.92 – 7.04 (m, 2H, C[3c; 5c]-H), 7.15 – 7.34 (m, 8H, C[4a]-H, C[2-6b]-H, C[2c; 6c]), 8.02 (dd, *J* = 5.1, 1.8 Hz, 1H, C[6a]-H).

**<sup>13</sup>C-NMR (101 MHz, CDCl<sub>3</sub>):**  $\delta$  = 10.9 (q, C[4]), 22.2 (q, C[9-10c]), 30.4 (t, C[3]), 56.2 (d, C[2]), 70.1 (d, C[8c]), 112.7 (d, C[5a]), 116.5 (d, C[3c; 5c]), 122.2 (s, C[1c]), 126.6 (d, C[2b; 6b]), 126.7 (d, C[4b]), 128.4 (d, C[3b; 5b]), 130.2 (d, C[2c; 6c]), 137.1 (s, C[4a]), 140.7 (s, C[1b]), 146.7 (d, C[6a]), 155.3 (s, C[4c]), 157.7 (s, C[2a]).

**TLC:** 0.51 (LP/EtOAc 5:1)

**GCMS:** Retention time: 8.68 min. Main fragments: 346 (M<sup>+</sup>, 19), 317 (100), 275 (32), 197 (25), 185 (26), 170 (11), 115 (21), 91 (45).

**HRMS:** calculated for C<sub>21</sub>H<sub>31</sub>N<sub>2</sub> [M+H]<sup>+</sup> 347.2118; found 347.2138;  $\Delta$  = 5.95 ppm.

### 3.3.5. N-(1-(4-(Dimethylamino)phenyl)propyl)-3-methylpyridin-2-amine (12)

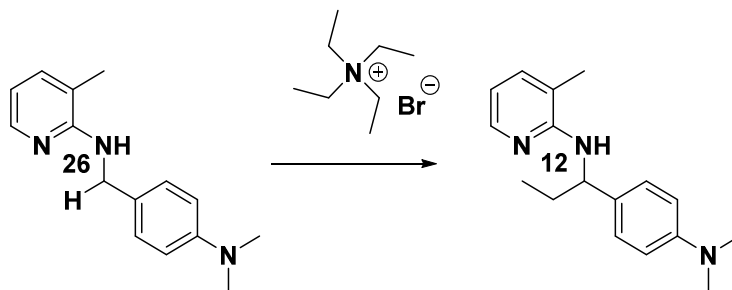

The reaction was carried out according to general procedure A with N-(4-(dimethylamino)benzyl)-3-methylpyridin-2-amine (**26**) (121 mg, 0.50 mmol, 1 eq.), tetraethylammonium bromide (105 mg, 0.50 mmol, 1 eq.), KOH (84 mg, 1.50 mmol, 3 eq.) and [RhCl(cod)]<sub>2</sub> (12 mg, 0.025 mmol, 0.05 eq.) in dry and degassed toluene (2 ml). The reaction mixture was heated for 16 h at 140 °C. The general work-up procedure B for C-H activation reactions was followed using gradient A. Product **12** was isolated in 61 % yield.

**N-(1-(4-(Dimethylamino)phenyl)propyl)-3-methylpyridin-2-amine (12)** Yellow oil (82 mg, 61 %).

**<sup>1</sup>H-NMR (400 MHz, CDCl<sub>3</sub>):**  $\delta$  = 0.91 (t,  $J$  = 7.4 Hz, 3H, C[4]-H<sub>3</sub>), 1.77 – 1.89 (m, 1H, C[3]-H), 1.93 – 2.05 (m, 1H, C[3]-H), 2.07 (s, 3H, C[7a]-H<sub>3</sub>), 2.92 (s, 6H, C[8-9b]-H<sub>3</sub>), 4.32 (d,  $J$  = 7.6 Hz, 1H, N[1]-H), 5.09 (q,  $J$  = 7.2 Hz, 1H, C[2]-H), 6.46 (dd,  $J$  = 7.1, 5.1 Hz, 1H, C[5a]-H), 6.67 – 6.75 (m, 2H, C[3b; 5b]-H), 7.17 (ddt,  $J$  = 6.3, 1.8, 0.9 Hz, 1H, C[4a]-H), 7.21 – 7.30 (m, 2H, C[2b; 6b]-H), 7.98 (dd,  $J$  = 5.1, 1.8 Hz, 1H, C[6a]-H).

**<sup>13</sup>C-NMR (101 MHz, CDCl<sub>3</sub>):**  $\delta$  = 11.0 (q, C[4]), 17.2 (q, C[7a]), 29.8 (t, C[3]), 40.8 (q, C[8-9b]), 55.6 (d, C[2]), 112.3 (d, C[5a]), 112.8 (d, C[3b; 5b]), 116.4 (s, C[3a]), 127.6 (d, C[2b; 6b]), 132.0 (s, C[1b]), 136.8 (d, C[4a]), 145.5 (d, C[6a]), 149.7 (s, C[4b]), 156.4 (s, C[2a]).

**TLC:** 0.29 (LP/EtOAc 5:1)

**GCMS:** Retention time: 7.82 min. Main fragments: 269 (M<sup>+</sup>, 13), 240 (47), 162 (72), 147 (30), 134 (100), 122 (82), 107 (26), 92 (58), 65 (36).

**HRMS:** calculated for C<sub>21</sub>H<sub>31</sub>N<sub>2</sub> [M+H]<sup>+</sup> 270.1965; found 270.1985;  $\Delta$  = 7.17 ppm.



### 3.3.6. N-(4-isopropoxybenzyl)-3-methylpyridin-2-amine (13)

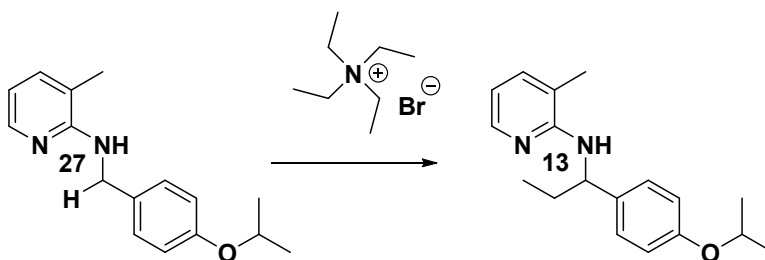

The reaction was carried out according to general procedure A with N-(4-isopropoxybenzyl)-3-methylpyridin-2-amine (**27**) (128 mg, 0.50 mmol, 1 eq.), tetraethylammonium bromide (105 mg, 0.50 mmol, 1 eq.), KOH (84 mg, 1.50 mmol, 3 eq.) and  $[\text{RhCl}(\text{cod})]_2$  (12 mg, 0.025 mmol, 0.05 eq.) in dry and degassed toluene (2 ml). The reaction mixture was heated for 16 h at 140 °C. The general work-up procedure B for C-H activation reactions was followed using gradient A. Product **13** was isolated in 69 % yield.

**N-(1-(4-isopropoxyphenyl)propyl)-3-methylpyridin-2-amine (13)** Yellow oil (99 mg, 69 %).

**$^1\text{H-NMR}$  (400 MHz,  $\text{CDCl}_3$ ):**  $\delta$  = 0.92 (t,  $J$  = 7.4 Hz, 3H, C[4]- $\text{H}_3$ ), 1.32 (d,  $J$  = 6.1 Hz, 6H, C[9-10b]- $\text{H}_3$ ), 1.79 – 1.89 (m, 1H, C[3]-H), 1.91 – 2.03 (m, 1H, C[3]-H), 2.10 (s, 3H, C[7a]- $\text{H}_3$ ), 4.33 (d,  $J$  = 7.7 Hz, 1H, N[1]-H), 4.51 (hept,  $J$  = 6.1 Hz, 1H, C[8b]-H), 5.13 (q,  $J$  = 7.2 Hz, 1H, C[2]-H), 6.48 (dd,  $J$  = 7.1, 5.1 Hz, 1H, C[5a]-H), 6.80 – 6.88 (m, 2H, C[3b; 5b]-H), 7.19 (ddt,  $J$  = 7.1, 1.9, 1.0 Hz, 1H, C[4a]-H), 7.23 – 7.32 (m, 2H, C[2b; 6b]-H), 7.98 (dd,  $J$  = 5.1, 1.8 Hz, 1H, C[6a]-H).

**$^{13}\text{C-NMR}$  (101 MHz,  $\text{CDCl}_3$ ):**  $\delta$  = 10.9 (q, C[4]), 17.2 (q, C[7a]), 22.3 (q, C[9-10b]), 30.1 (t, C[3]), 55.6 (d, C[2]), 69.9 (d, C[8b]), 112.5 (d, C[5a]), 115.8 (d, C[3b; 5b]), 116.4 (s, C[3a]), 127.8 (d, C[2b; 6b]), 136.0 (s, C[1b]), 136.8 (d, C[4a]), 145.6 (d, C[6a]), 156.4 (s, C[4b]), 156.9 (s, C[2a]).

**TLC:** 0.34 (LP/EtOAc 5:1)

**GCMS:** Retention time: 7.52 min. Main fragments: 284 ( $\text{M}^+$ , 19), 255 (74), 213 (66), 177 (10), 135 (69), 119 (38), 107 (100), 92 (86), 77 (13), 65 (29).

**HRMS:** calculated for  $\text{C}_{21}\text{H}_{31}\text{N}_2$   $[\text{M}+\text{H}]^+$  285.1961; found 285.1989;  $\Delta$  = 9.91 ppm.

### 3.3.7. 3-Methyl-N-(1-(4-(trifluoromethyl)phenyl)propyl)pyridin-2-amine (14)

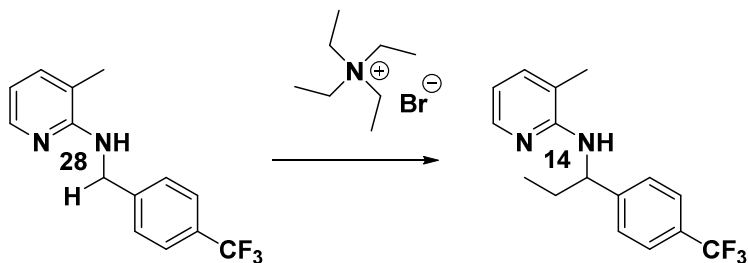

The reaction was carried out according to general procedure A with 3-methyl-N-(4-(trifluoromethyl)benzyl)pyridin-2-amine (**28**) (133 mg, 0.50 mmol, 1 eq.), tetraethylammonium bromide (105 mg, 0.50 mmol, 1 eq.), KOH (84 mg, 1.50 mmol, 3 eq.) and  $[\text{RhCl}(\text{cod})]_2$  (12 mg, 0.025 mmol, 0.05 eq.) in dry and degassed toluene (2 ml). The reaction mixture was heated for 16 h at 140 °C. The general work-up procedure B for C-H activation reactions was followed using gradient A. Product **14** was isolated in 53 % yield.

**3-Methyl-N-(1-(4-(trifluoromethyl)phenyl)propyl)pyridin-2-amine (14)** Yellow oil (78 mg, 53 %).

**$^1\text{H-NMR}$  (400 MHz,  $\text{CDCl}_3$ ):**  $\delta$  = 0.97 (t,  $J$  = 7.4 Hz, 3H, C[4]-H<sub>3</sub>), 1.85 – 1.96 (m, 2H, C[3]-H<sub>2</sub>), 2.15 (s, 3H, C[7a]-H<sub>3</sub>), 4.41 (d,  $J$  = 7.3 Hz, 1H, N[1]-H), 5.21 (q,  $J$  = 7.1 Hz, 1H, C[2]-H), 6.50 (dd,  $J$  = 7.1, 5.1 Hz, 1H, C[5a]-H), 7.22 (ddd,  $J$  = 7.2, 1.9, 0.9 Hz, 1H, C[4a]-H), 7.45 – 7.58 (m, 4H, C[2-3b; 5-6b]-H), 7.92 (dd,  $J$  = 5.1, 1.7 Hz, 1H, C[6a]-H)).

**$^{13}\text{C-NMR}$  (101 MHz,  $\text{CDCl}_3$ ):**  $\delta$  = 10.9 (q, C[4]), 17.2 (q, C[7a]), 30.4 (t, C[3]), 56.0 (d, C[2]), 113.1 (d, C[5a]), 116.4 (s, C[3a]), 124.4 (s,  $J_{\text{CF}}$  = 271.9 Hz, C[7b]), 125.4 (d,  $J_{\text{CF}}$  = 3.8 Hz, C[3b; 5b]), 127.0 (d, C[2b; 6b]), 129.0 (s,  $J_{\text{CF}}$  = 32.0 Hz, C[4b]), 137.1 (d, C[4a]), 145.6 (d, C[6a]), 148.7 (s, C[1b]), 156.0 (s, C[2a]).

**TLC:** 0.48 (LP/EtOAc 5:1)

**GCMS:** Retention time: 6.45 min. Main fragments: 294 ( $\text{M}^+$ , 20), 279 (15), 265 (100), 159 (16), 108 (57), 92 (84), 80 (15), 65 (57).

**HRMS:** calculated for  $\text{C}_{21}\text{H}_{31}\text{N}_2$  [ $\text{M}+\text{H}$ ] $^+$  295.1417; found 295.1417;  $\Delta$  = 0.4 ppm.

### 3.3.8. N-(1-(4-Methoxyphenyl)propyl)-3-methylpyridin-2-amine (15)

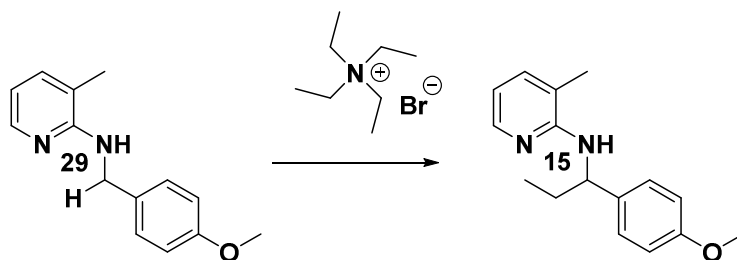

The reaction was carried out according to general procedure A with N-(4-methoxybenzyl)-3-methylpyridin-2-amine (**29**) (114 mg, 0.50 mmol, 1 eq.), tetraethylammonium bromide (105 mg, 0.50 mmol, 1 eq.), KOH (84 mg, 1.50 mmol, 3 eq.) and [RhCl(cod)]<sub>2</sub> (12 mg, 0.025 mmol, 0.05 eq.) in dry and degassed toluene (2 ml). The reaction mixture was heated for 16 h at 140 °C. The general work-up procedure B for C-H activation reactions was followed using gradient A. Product **15** was isolated in 71 % yield.

**N-(1-(4-Methoxyphenyl)propyl)-3-methylpyridin-2-amine (15)** Yellowish oil (92 mg, 71 %).

**<sup>1</sup>H-NMR (400 MHz, CDCl<sub>3</sub>):**  $\delta$  = 0.93 (t, *J* = 7.4 Hz, 3H, C[4]-H<sub>3</sub>), 1.78 – 1.91 (m, 1H, C[3]-H), 1.92 – 2.04 (m, 1H, C[3]-H), 2.10 (s, 3H, C[7a]-H<sub>3</sub>), 3.78 (s, 3H, C[8b]-H<sub>3</sub>), 4.34 (d, *J* = 7.6 Hz, 1H, N[1]-H), 5.13 (q, *J* = 7.2 Hz, 1H, C[2]-H), 6.47 (dd, *J* = 7.1, 5.1 Hz, 1H, C[5a]-H), 6.84 – 6.89 (m, 2H, C[3b; 5b]-H), 7.19 (ddq, *J* = 7.1, 1.7, 0.9 Hz, 1H, C[4a]-H), 7.27 – 7.32 (m, 2H, C[2b; 6b]-H), 7.97 (ddd, *J* = 5.1, 1.8, 0.7 Hz, 1H, C[6a]-H).

**<sup>13</sup>C-NMR (101 MHz, CDCl<sub>3</sub>):**  $\delta$  = 10.9 (q, C[4]), 17.2 (q, C[7a]), 30.2 (t, C[3]), 55.3 (q, C[8b]), 55.6 (d, C[2]), 112.6 (d, C[5a]), 113.9 (d, C[3b; 5b]), 116.4 (s, C[3a]), 127.8 (d, C[2b; 6b]), 136.3 (s, C[1b]), 136.9 (d, C[4a]), 145.6 (d, C[6a]), 156.3 (s, C[4b]), 158.5 (s, C[2a]).

**TLC:** 0.41 (LP/EtOAc 5:1)

**GCMS:** Retention time: 7.31 min. Main fragments: 256 (M<sup>+</sup>, 21), 227 (96), 149 (41), 133 (14), 121 (68), 108 (21), 92 (100), 77 (13), 65 (24).

**HRMS:** calculated for C<sub>21</sub>H<sub>31</sub>N<sub>2</sub> [M+H]<sup>+</sup> 257.1648; found 257.1666;  $\Delta$  = 6.95 ppm.

### 3.3.9. N-(1-(4-fluorophenyl)propyl)-3-methylpyridin-2-amine (16)

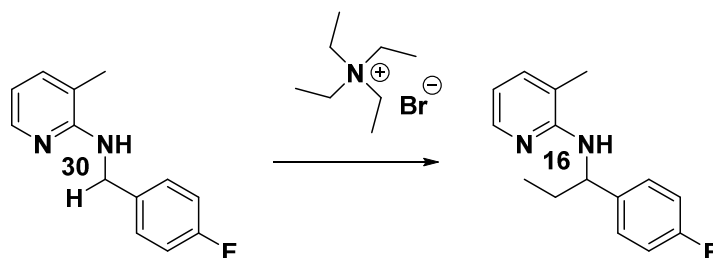

The reaction was carried out according to general procedure A for C-H activation reactions with N-(4-fluorobenzyl)-3-methylpyridin-2-amine (**30**) (108 mg, 0.50 mmol, 1 eq.), tetraethylammonium bromide (105 mg, 0.50 mmol, 1 eq.), KOH (84 mg, 1.50 mmol, 3 eq.) and [RhCl(cod)]<sub>2</sub> (12 mg, 0.025 mmol, 0.05 eq.) in dry and degassed toluene (2 ml). The reaction mixture was heated for 16 h at 140 °C. The general work-up procedure B for C-H activation reactions was followed using gradient A. Product **16** was isolated in 50 % yield.

**N-(1-(4-fluorophenyl)propyl)-3-methylpyridin-2-amine (16)** Yellow oil (61 mg, 50 %).

**<sup>1</sup>H-NMR (400 MHz, CDCl<sub>3</sub>):**  $\delta$  = 0.94 (t,  $J$  = 7.4 Hz, 3H, C[4]-H<sub>3</sub>), 1.80 – 2.00 (m, 2H, C[3]-H<sub>2</sub>), 2.12 (s, 3H, C[7a]-H<sub>3</sub>), 4.35 (d,  $J$  = 7.5 Hz, 1H, N[1]-H), 5.15 (q,  $J$  = 7.2 Hz, 1H, C[2]-H), 6.49 (dd,  $J$  = 7.1, 5.1 Hz, 1H, C[5a]-H), 6.93 – 7.04 (m, 2H, C[3b; 5b]-H), 7.16 – 7.23 (m, 1H, C[4a]-H), 7.29 – 7.39 (m, 2H, C[2b; 6b]-H), 7.95 (dd,  $J$  = 5.2, 1.7 Hz, 1H, C[6a]-H).

**<sup>13</sup>C-NMR (101 MHz, CDCl<sub>3</sub>):**  $\delta$  = 10.9 (q, C[4]), 17.2 (q, C[7a]), 30.4 (t, C[3]), 55.6 (d, C[2]), 112.9 (d, C[5a]), 115.2 (d,  $J_{CF}$  = 21.2 Hz, C[3b; 5b]), 116.4 (s, C[3a]), 128.2 (d,  $J_{CF}$  = 7.9 Hz, C[2b; 6b]), 137.0 (d, C[4a]), 140.1 (s,  $J_{CF}$  = 3.2 Hz, C[1b]), 145.6 (d, C[6a]), 156.1 (s, C[2a]), 161.8 (s,  $J_{CF}$  = 244.2 Hz, C[4b]).

**TLC:** 0.49 (LP/EtOAc 5:1)

**GCMS:** Retention time: 6.52 min. Main fragments: 244 (M<sup>+</sup>, 16), 215 (100), 152 (9), 119 (11), 109 (59), 92 (59), 65 (28).

**HRMS:** calculated for C<sub>21</sub>H<sub>31</sub>N<sub>2</sub> [M+H]<sup>+</sup> 245.1449; found 245.1463;  $\Delta$  = 6.21 ppm.

### 3.4. Alternative Substrates

#### 3.4.1. 1-(2-Ethylphenyl)ethan-1-one (18)

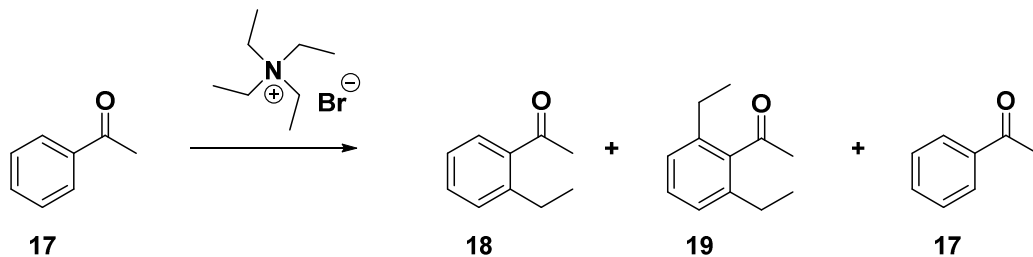

The reaction was carried out according to general procedure A with **17** (60 mg, 0.50 mmol, 1 eq.), tetraethylammonium bromide (315 mg, 1.50 mmol, 3 eq.), KOH (84 mg, 1.50 mmol, 3 eq.) and RuH<sub>2</sub>(CO)(PPh<sub>3</sub>)<sub>3</sub> (18 mg, 0.02 mmol, 0.04 eq.) in dry and degassed toluene (2 ml). The reaction mixture was heated for 22 h at 150 °C. The solid material was removed by filtration using a Pasteur pipette with cotton and silica (Silica was conditioned with EtOAc with 1% triethylamine to neutralize the acidic groups). The residue was washed with EtOAc. The combined organic phases were concentrated under reduced pressure. The resulting crude residue was purified by flash column chromatography (LP/EtOAc; 2% EtOAc - both solvents with 1% triethylamine). Product **18** could not be separated from starting material **17** and byproduct **19** by column chromatography. Therefore we isolated a mixture of product, byproduct and starting material, which was quantified with <sup>1</sup>H-NMR. 73 mg of a brown liquid was obtained. Ratio of this 73 mg mixture was determined by NMR: product **18** / byproduct **19** / starting material **17** = 1/0.38/0.11. Calculated yields with Ratio: 67.1% product, 25.5% byproduct, 7.3% starting material.

#### 1-(2-Ethylphenyl)ethan-1-one (18)

<sup>1</sup>H-NMR (400 MHz, CDCl<sub>3</sub>): δ = 1.21 (td, J = 7.5, 1.7 Hz, 3H, CH<sub>2</sub>-CH<sub>3</sub>), 2.58 (s, 3H, CO-CH<sub>3</sub>), 2.88 (q, J = 7.5 Hz, 2H, CH<sub>2</sub>-CH<sub>3</sub>), 7.25 – 7.29 (m, 2H, C[3]-H; C[5]-H), 7.40 (td, J = 7.5, 1.5 Hz, 1H, C[4]-H), 7.62 (dd, J = 7.7, 1.4 Hz, 1H, C[6]-H).

<sup>13</sup>C-NMR (101 MHz, CDCl<sub>3</sub>): δ = 16.1 (q, CH<sub>2</sub>-CH<sub>3</sub>), 27.2 (t, CH<sub>2</sub>-CH<sub>3</sub>), 30.1 (q, CO-CH<sub>3</sub>), 125.7 (d, C[3]), 129.1 (d, C[6]), 130.6 (d, C[5]), 131.6 (d, C[4]), 138.6 (s, C[1]), 144.3 (s, C[2]), 202.4 (s, C=O).

**GCMS of Compound 18:** Retention time: 3.90 min. Main fragments: 148 (M<sup>+</sup>, 28), 133 (100), 115 (12), 105 (33), 91 (16), 79 (27).

### 3.4.2. 1-(2-ethylphenyl)-N-(4-methoxyphenyl)ethan-1-imine (20)

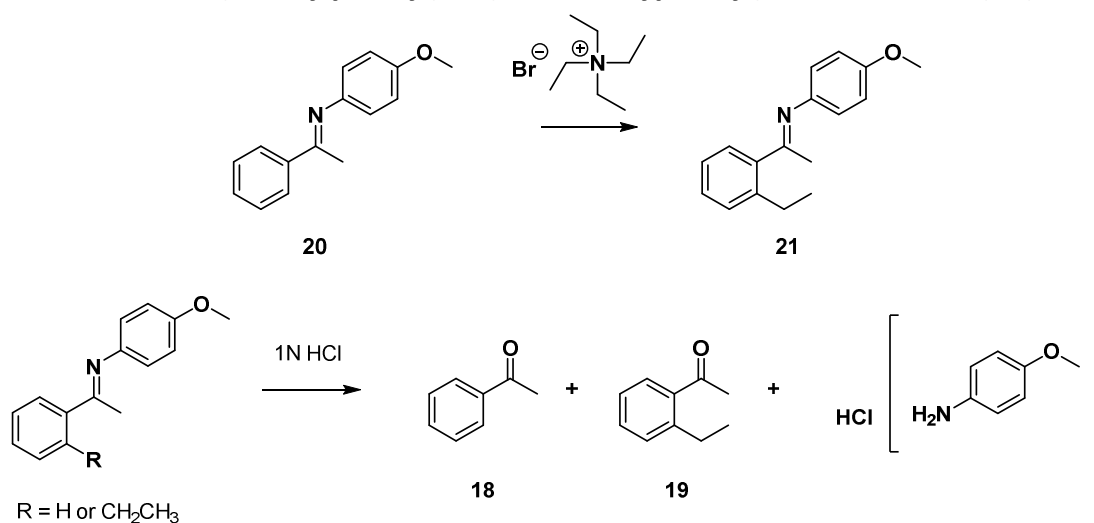

The reaction was carried out according to general procedure A with **20** (113 mg, 0.50 mmol, 1 eq.), tetraethylammonium bromide (315 mg, 1.50 mmol, 3 eq.), KOH (84 mg, 1.50 mmol, 3 eq.) and RhCl(PPh<sub>3</sub>)<sub>3</sub> (23 mg, 0.025 mmol, 0.05 eq.) in dry and degassed toluene (2 ml). The reaction mixture was heated for 22 h at 150 °C. After cooling to r.t. 5 ml 1N HCl was added and stirred vigorously for 45 min. The hydrolyzed compounds were extracted with Et<sub>2</sub>O and the combined organic layers were dried over Na<sub>2</sub>SO<sub>4</sub>. The solvents were evaporated under reduced pressure. The resulting crude material was purified with column chromatography (LP/EtOAc; 2% EtOAc - both solvents with 1% triethylamine). Product **18** could not be separated from compound **19** by column chromatography. Therefore a mixture was isolated which was quantified with <sup>1</sup>H-NMR. 62 mg of a brown liquid was obtained. Ratio of this 62 mg mixture was determined by NMR: product **18** / starting material **19** = 0.65/1. Calculated yields with Ratio: 39.4% product, 60.6% starting material.

#### 1-(2-Ethylphenyl)ethan-1-one (18)

<sup>1</sup>H-NMR (400 MHz, CDCl<sub>3</sub>): δ = 1.22 (td, J = 7.5, 1.7 Hz, 3H, CH<sub>2</sub>-CH<sub>3</sub>), 2.58 (s, 3H, CO-CH<sub>3</sub>), 2.88 (q, J = 7.5 Hz, 2H, CH<sub>2</sub>-CH<sub>3</sub>), 7.26 – 7.30 (m, 2H, C[3]-H; C[5]-H), 7.38 – 7.43 (m, 1H, C[4]-H), 7.62 (dd, J = 7.8, 1.4 Hz, 1H, C[6]-H).

<sup>13</sup>C-NMR (101 MHz, CDCl<sub>3</sub>): δ = 16.1 (q, CH<sub>2</sub>-CH<sub>3</sub>), 27.2 (t, CH<sub>2</sub>-CH<sub>3</sub>), 30.1 (q, CO-CH<sub>3</sub>), 125.7 (d, C[3]), 129.1 (d, C[6]), 130.6 (d, C[5]), 131.6 (d, C[4]), 138.1 (s, C[1]), 144.3 (s, C[2]), 202.4 (s, C=O).

**GCMS of Compound 21:** Retention time: 7.17 min. Main fragments: 253 (M<sup>+</sup>, 31), 238 (16), 146 (21), 131 (75), 123 (100), 108 (48), 91 (31), 77 (49), 64 (23).

### **3.5. GC Calibration**

#### **3.5.1. General Procedure**

The very pure compound was placed in a 10 ml volumetric flask and dissolved in 10 ml EtOAc. This stock solution was diluted 5 times by taking 0.8; 0.6; 0.4; 0.2 ml and backfilling the sample to 1 ml with EtOAc. Also a blank sample containing only 1 ml EtOAc without any compound was measured. At this stage, dodecane was added as internal standard to every 1 ml sample separately. The amount of compound (mol/ml) in the stock solution was calculated, and the same amount of dodecane was added to every sample. Each dilution series was performed twice, and each sample was measured twice by GC to exclude any operational failures in the procedure.

### 3.5.2. N-Benzyl-3-methylpyridin-2-amine (1)

|                   | WP [mg] | Stock sol. [mg/ml] | n [mmol] | [μl] |
|-------------------|---------|--------------------|----------|------|
| <b>Compound 1</b> | 50.7    | 5.07               | 0.0256   |      |
| <b>Dodecane</b>   |         |                    | 0.0256   | 5.8  |

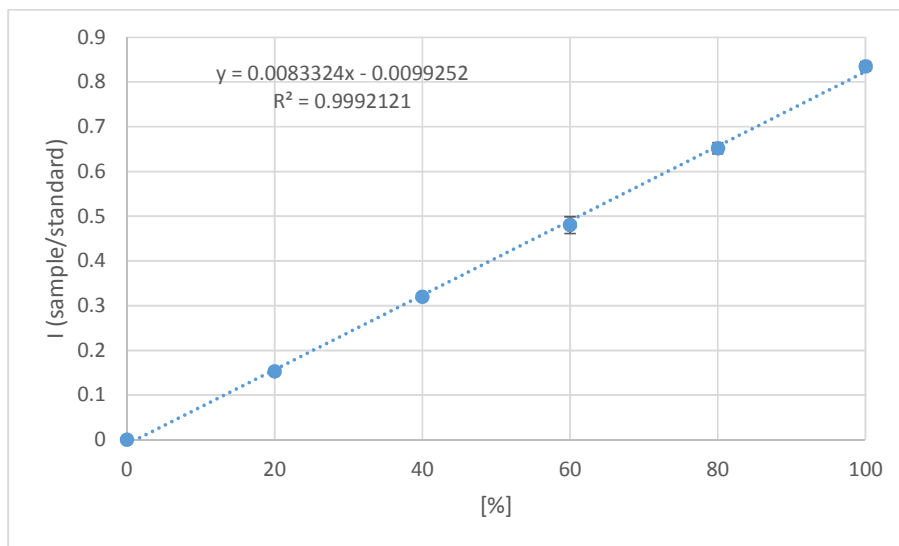

| Exp.      | Compound | Standard | C/STD  | Average | St.deva | Yield [%] |
|-----------|----------|----------|--------|---------|---------|-----------|
| <b>1A</b> | 4795378  | 5772722  | 0.8307 | 0.8351  | 0.0063  | 100       |
| <b>1B</b> | 4968112  | 5917073  | 0.8396 |         |         |           |
| <b>2A</b> | 3591105  | 5629744  | 0.6379 | 0.6519  | 0.0199  | 80        |
| <b>2B</b> | 3954529  | 5936940  | 0.6661 |         |         |           |
| <b>3A</b> | 2957209  | 6169331  | 0.4793 | 0.4802  | 0.0012  | 60        |
| <b>3B</b> | 2760808  | 5738035  | 0.4811 |         |         |           |
| <b>4A</b> | 1942723  | 5979335  | 0.3249 | 0.3194  | 0.0076  | 40        |
| <b>4B</b> | 1781911  | 5673429  | 0.3140 |         |         |           |
| <b>5A</b> | 908326   | 5693157  | 0.1595 | 0.1532  | 0.0088  | 20        |
| <b>5B</b> | 893569   | 6078104  | 0.1470 |         |         |           |
| <b>6A</b> | 0        | 6015655  | 0      | 0       | 0       | 0         |
| <b>6B</b> | 0        | 6200815  | 0      |         |         |           |



### 3.5.3. 3-Methyl-N-(1-phenylpropyl)pyridin-2-amine (2)

|                   | WP [mg] | Stock sol. [mg/ml] | n [mmol] | [ $\mu$ l] |
|-------------------|---------|--------------------|----------|------------|
| <b>Compound 2</b> | 51.9    | 5.19               | 0.0229   |            |
| <b>Dodecane</b>   |         |                    | 0.0229   | 5.2        |

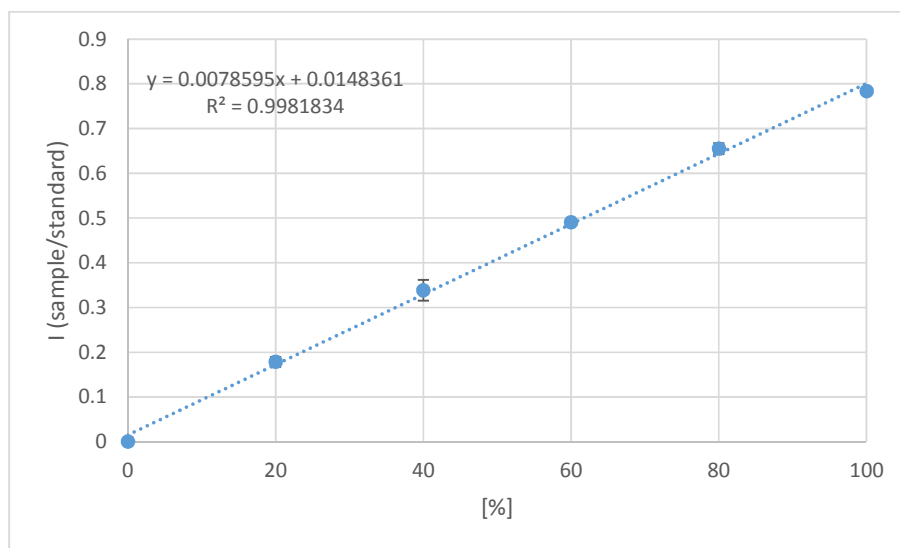

| Exp.      | Compound | Standard | C/STD  | Average | St.deva | Yield [%] |
|-----------|----------|----------|--------|---------|---------|-----------|
| <b>1A</b> | 5338061  | 6838969  | 0.7805 | 0.7839  | 0.0048  | 100       |
| <b>1B</b> | 5368112  | 6817073  | 0.7874 |         |         |           |
| <b>2A</b> | 4542839  | 6838969  | 0.6642 | 0.6553  | 0.0126  | 80        |
| <b>2B</b> | 4354529  | 6736940  | 0.6463 |         |         |           |
| <b>3A</b> | 3269098  | 6684184  | 0.4890 | 0.4902  | 0.0017  | 60        |
| <b>3B</b> | 3360808  | 6838035  | 0.4914 |         |         |           |
| <b>4A</b> | 2427078  | 6833748  | 0.3551 | 0.3386  | 0.0233  | 40        |
| <b>4B</b> | 2181911  | 6773429  | 0.3221 |         |         |           |
| <b>5A</b> | 1204454  | 7049999  | 0.1708 | 0.1786  | 0.0110  | 20        |
| <b>5B</b> | 1263569  | 6778104  | 0.1864 |         |         |           |
| <b>6A</b> | 0        | 6515655  | 0      | 0       | 0       | 0         |
| <b>6B</b> | 0        | 6700815  | 0      |         |         |           |

### 3.5.4. 3-Methyl-N-(1-phenylpentyl)pyridin-2-amine (4)

|                   | WP [mg] | Stock sol. [mg/ml] | n [mmol] | [μl] |
|-------------------|---------|--------------------|----------|------|
| <b>Compound 4</b> | 56.3    | 5.63               | 0.0221   |      |
| <b>Dodecane</b>   |         |                    | 0.0221   | 5.0  |

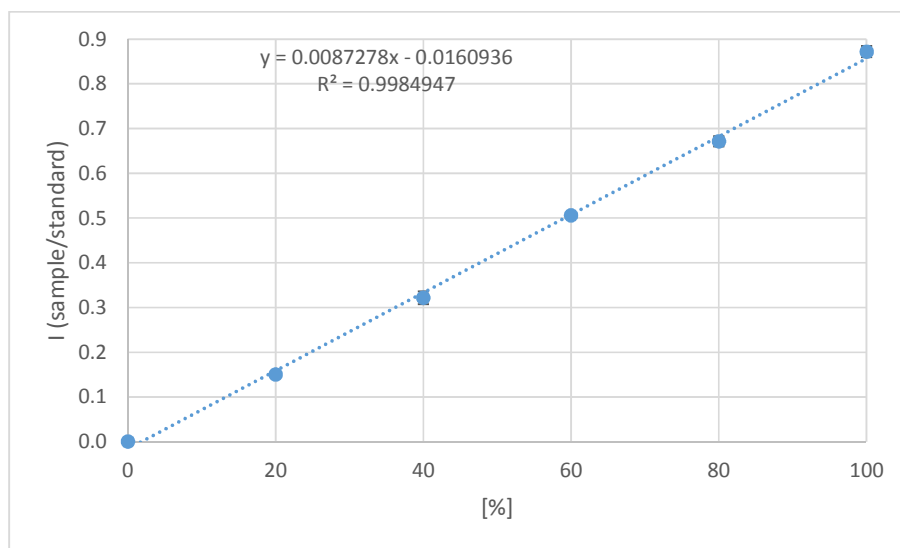

| Exp.      | Compound | Standard | C/STD  | Average | St.deva | Yield [%] |
|-----------|----------|----------|--------|---------|---------|-----------|
| <b>1A</b> | 7083177  | 8206139  | 0,8632 | 0.8722  | 0.0127  | 100       |
| <b>1B</b> | 7125337  | 8086306  | 0,8812 |         |         |           |
| <b>2A</b> | 5460570  | 8226270  | 0,6638 | 0.6717  | 0.0112  | 80        |
| <b>2B</b> | 5452322  | 8022359  | 0,6796 |         |         |           |
| <b>3A</b> | 4087478  | 8112093  | 0,5039 | 0.5059  | 0.0029  | 60        |
| <b>3B</b> | 4148791  | 8167410  | 0,5080 |         |         |           |
| <b>4A</b> | 2850068  | 8587257  | 0,3319 | 0.3218  | 0.0143  | 40        |
| <b>4B</b> | 2647071  | 8492676  | 0,3117 |         |         |           |
| <b>5A</b> | 1095848  | 7244834  | 0,1513 | 0.1502  | 0.0015  | 20        |
| <b>5B</b> | 1167961  | 7831471  | 0,1491 |         |         |           |
| <b>6A</b> | 0        | 8112093  | 0      | 0       | 0       | 0         |
| <b>6B</b> | 0        | 8167410  | 0      |         |         |           |

## 4. NMR Spectra of New Compounds

NMR Spectra of new compounds will follow in the next pages.

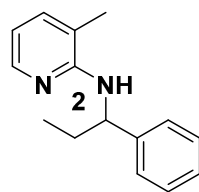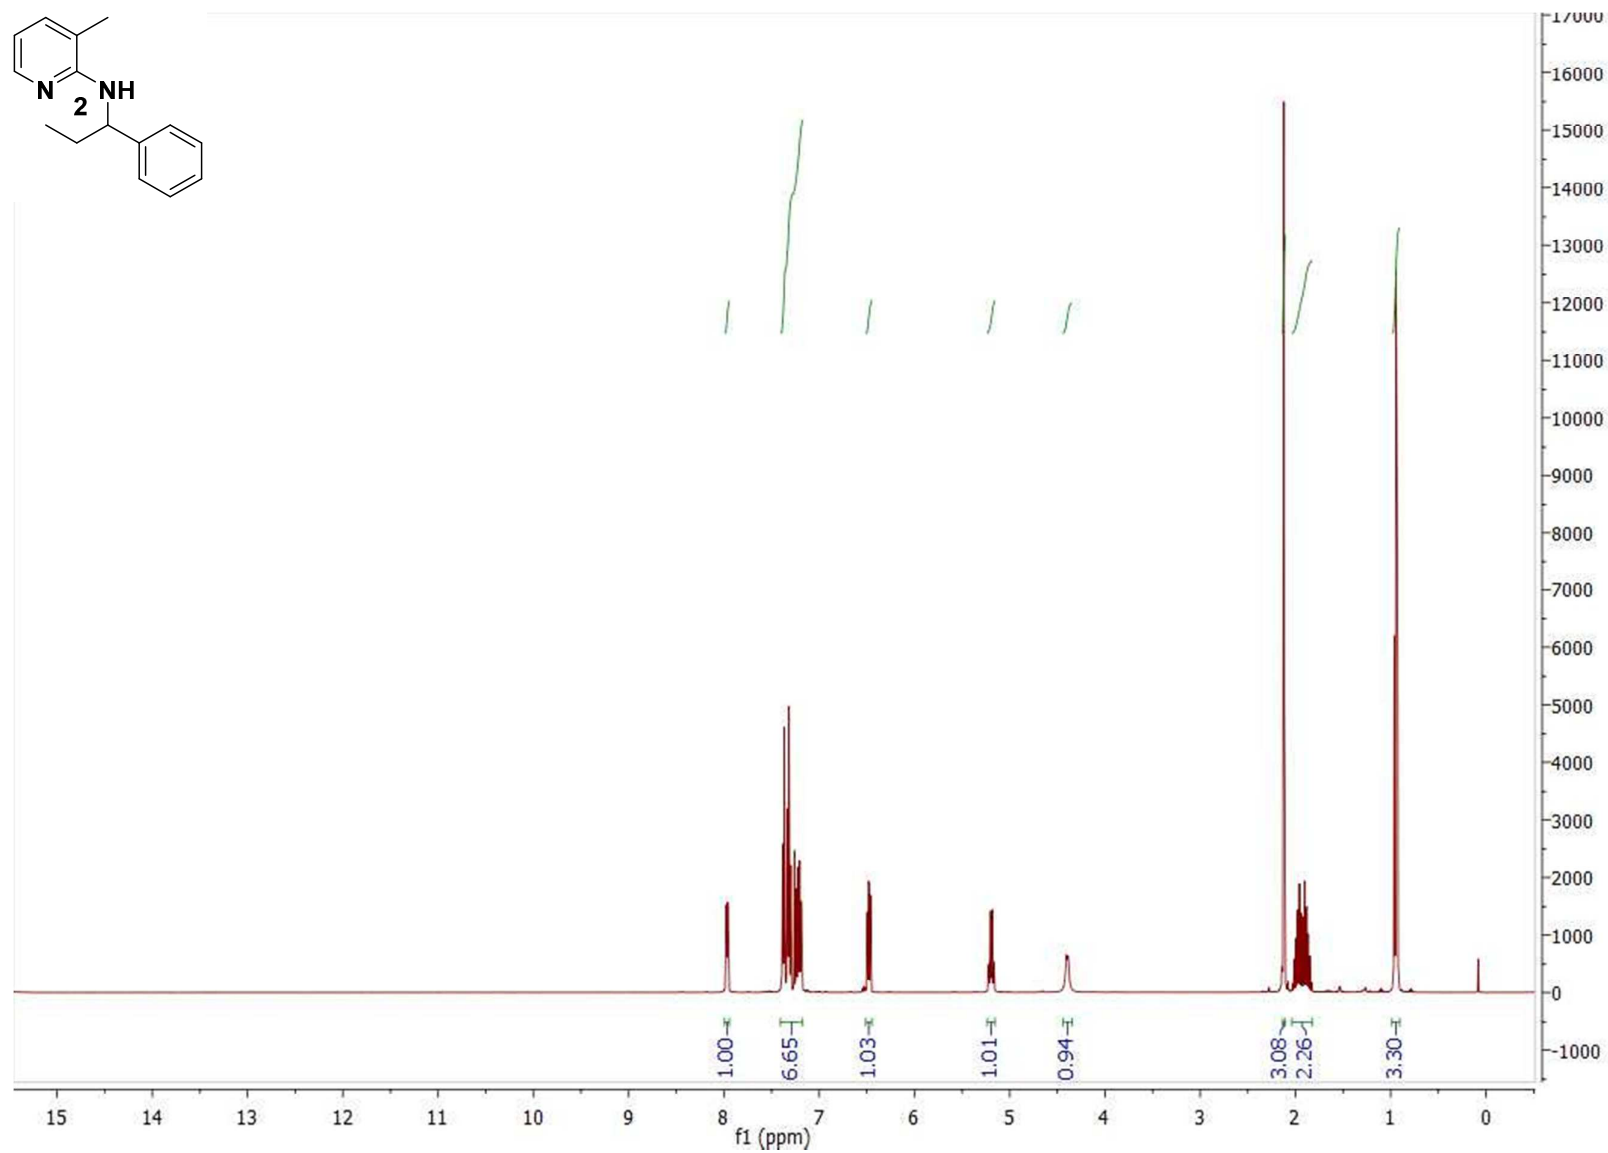

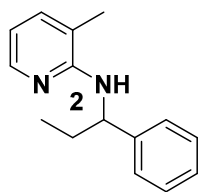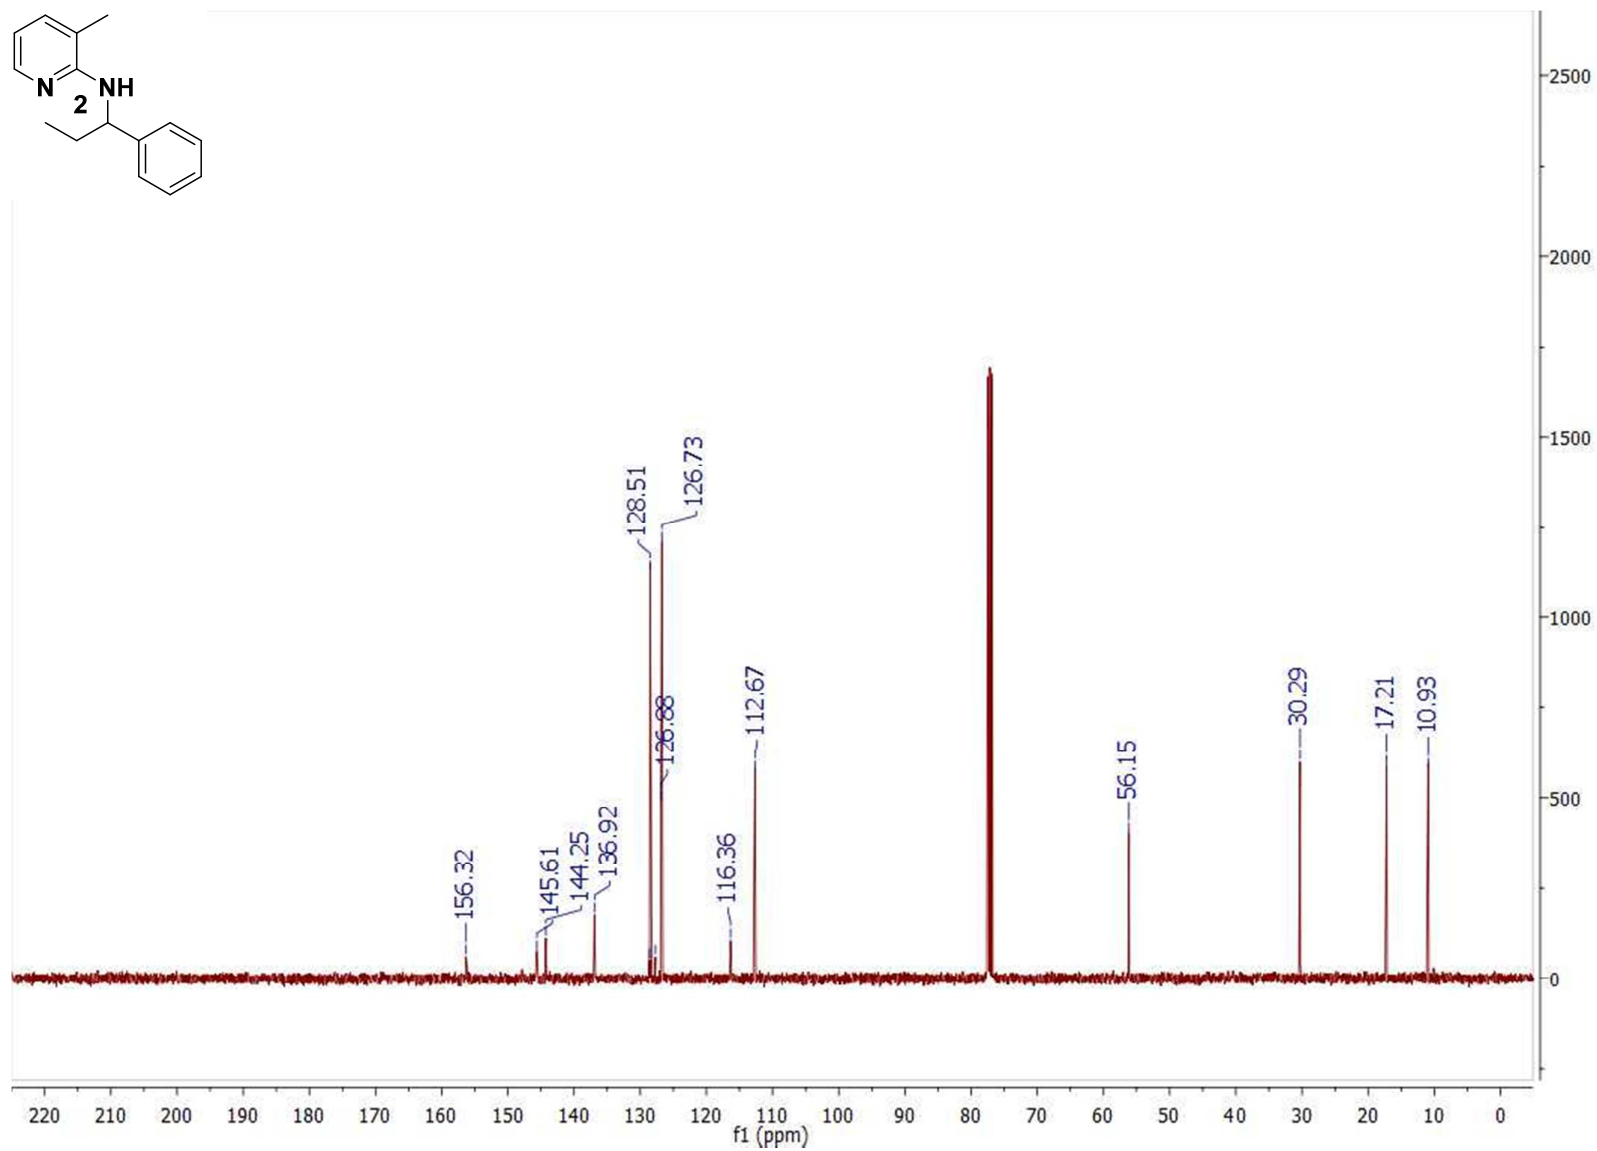

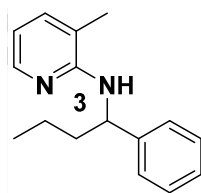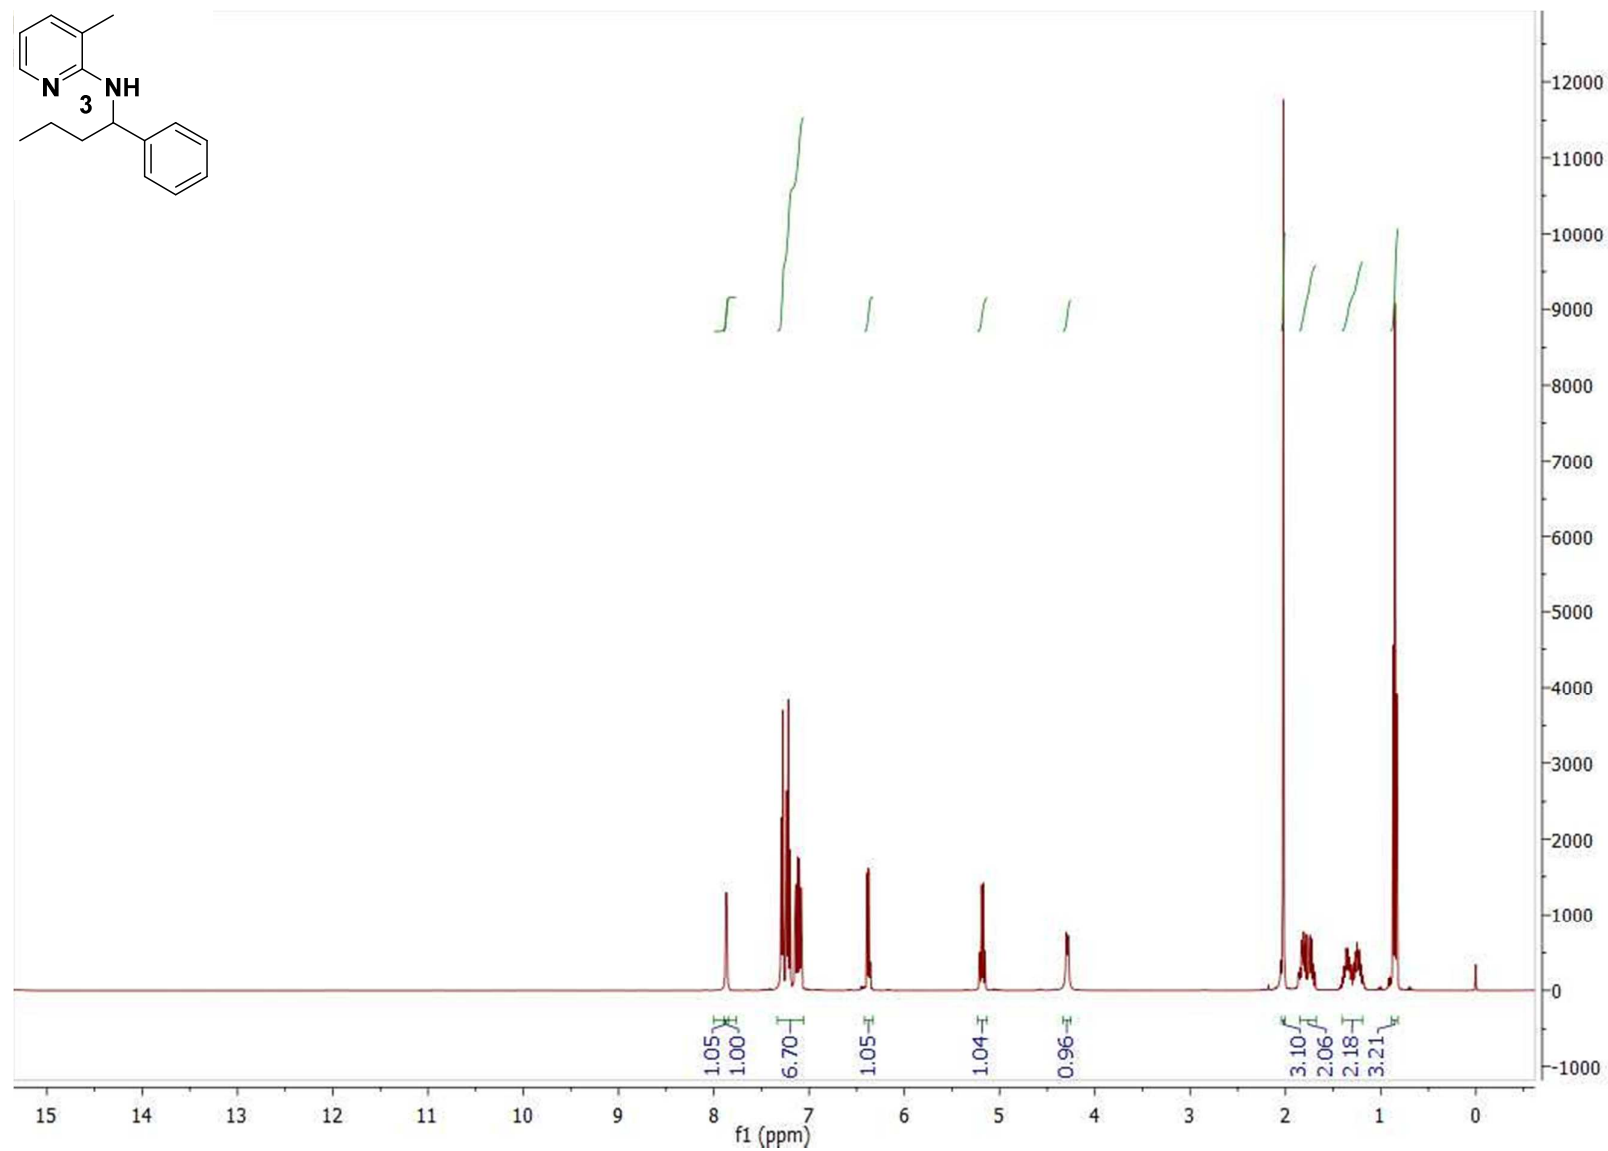

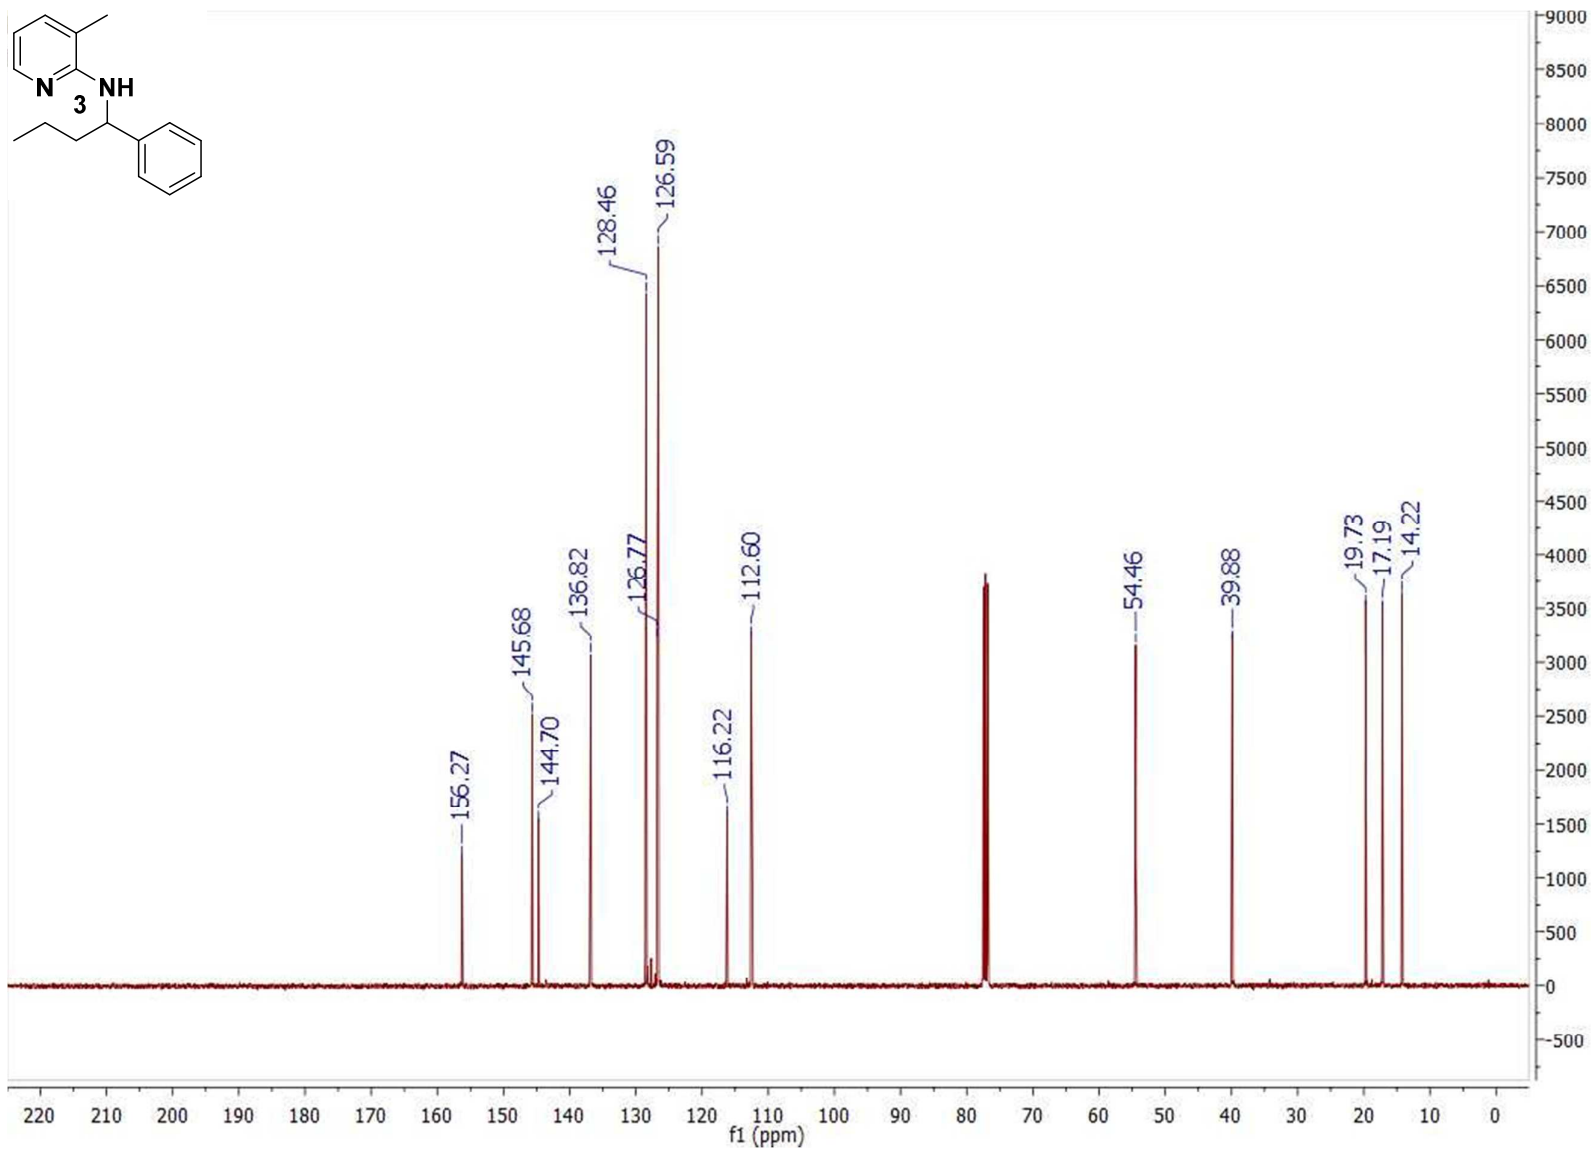

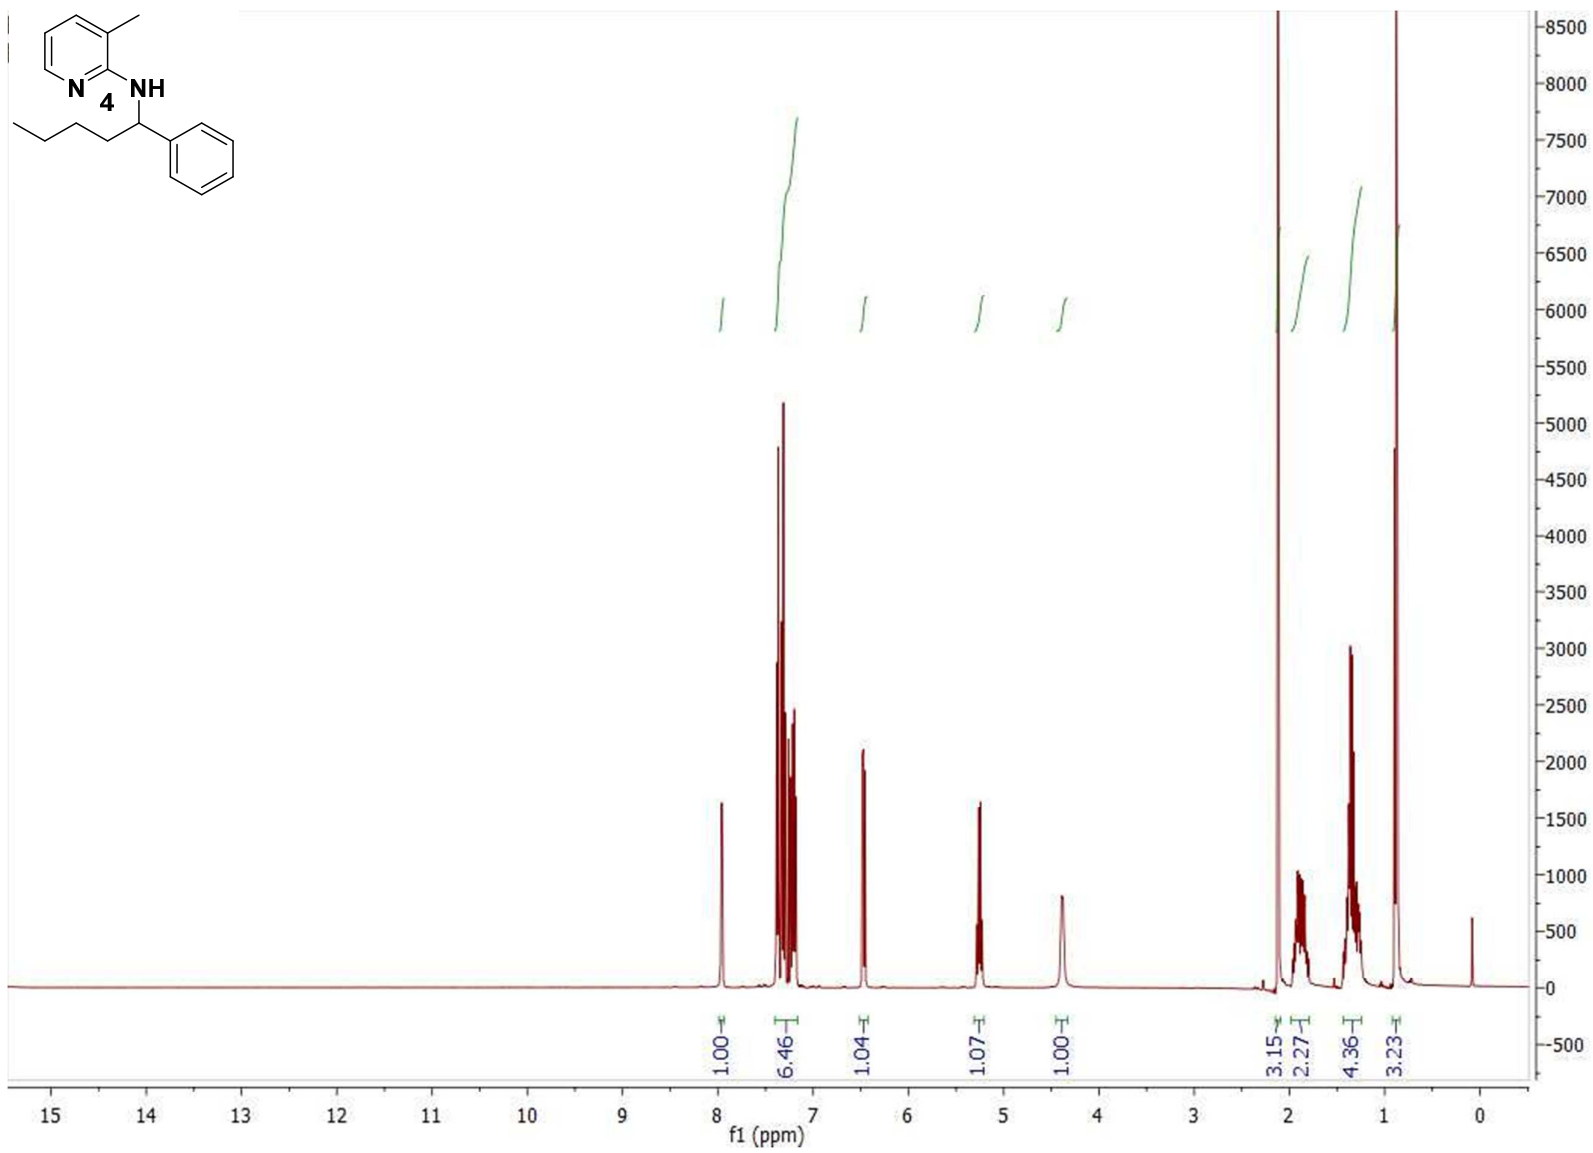

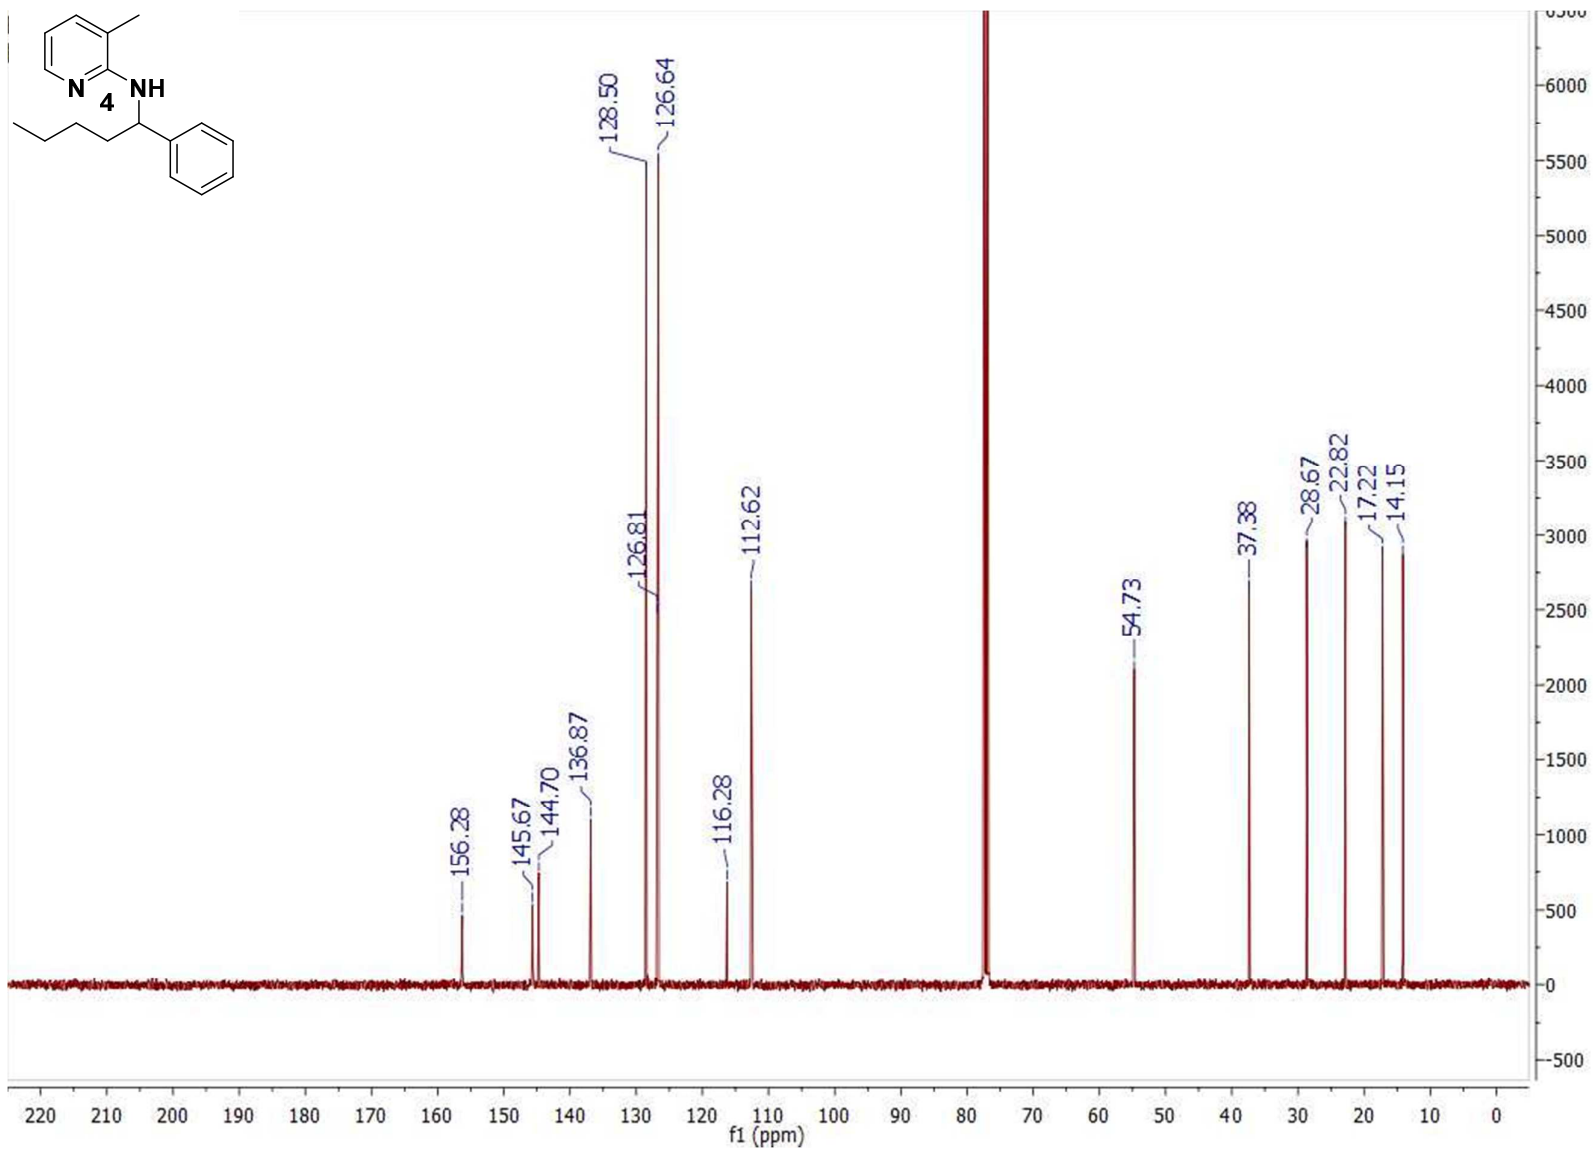



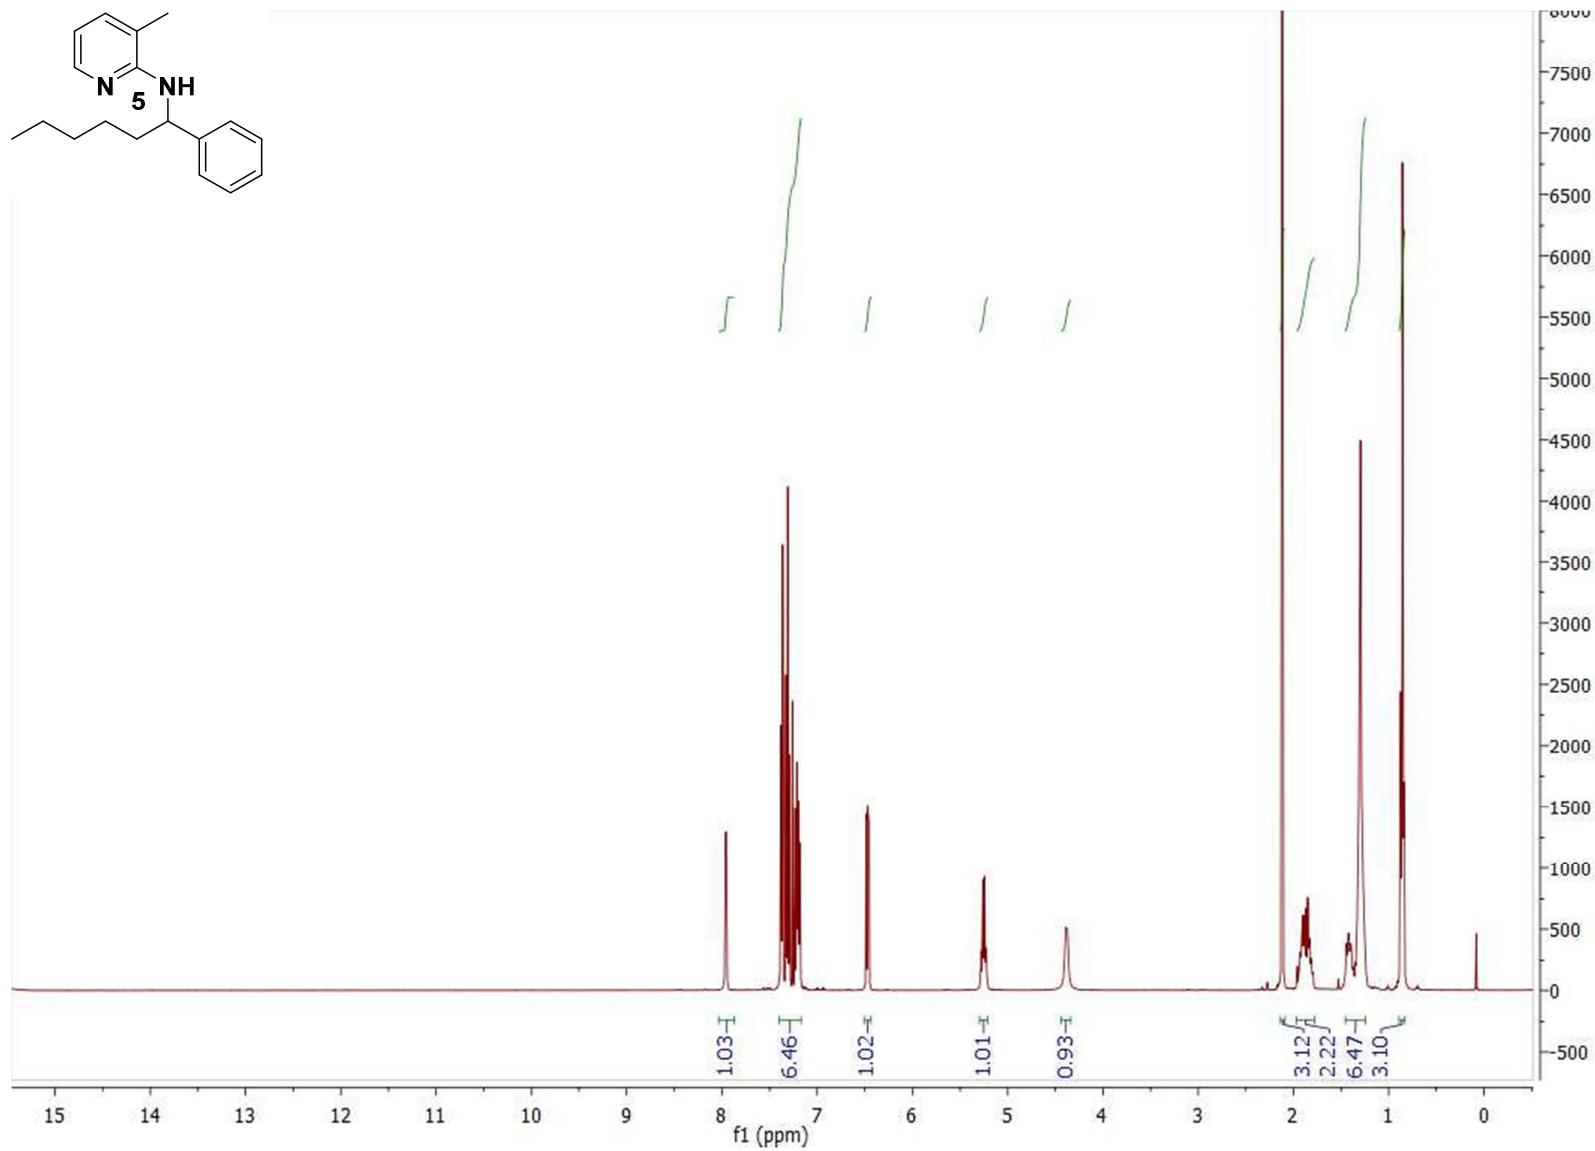

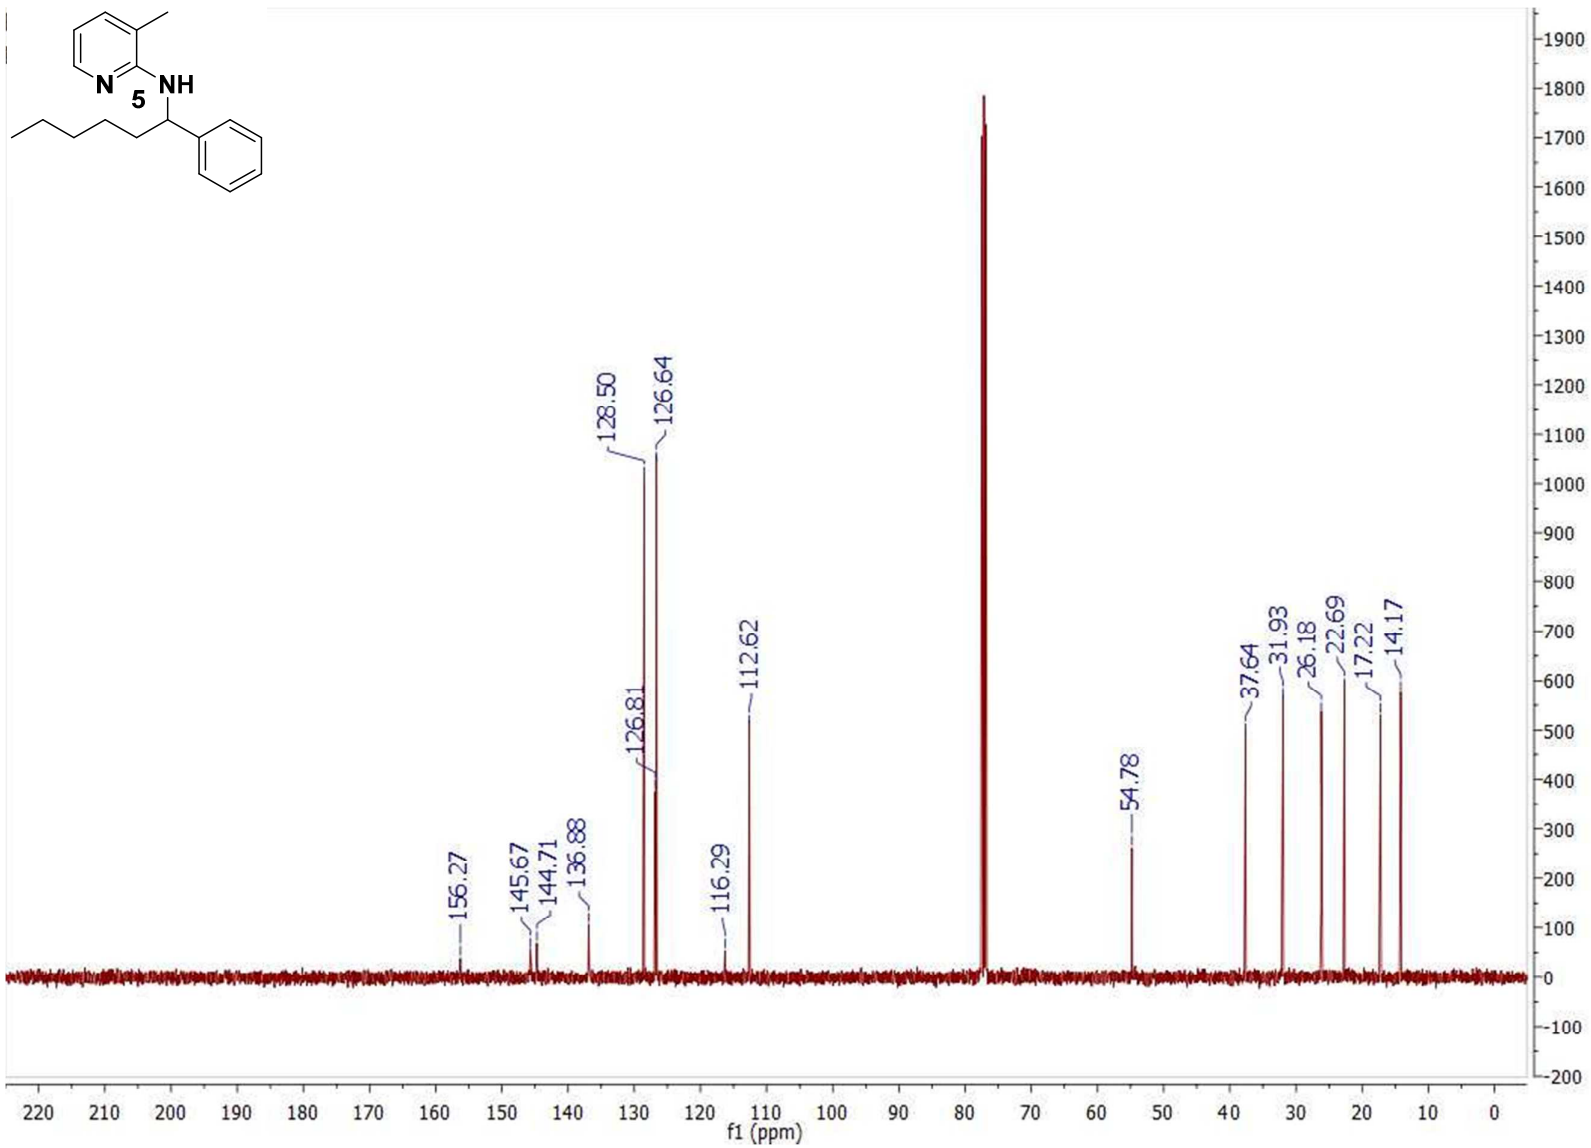

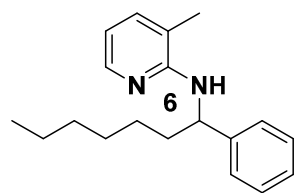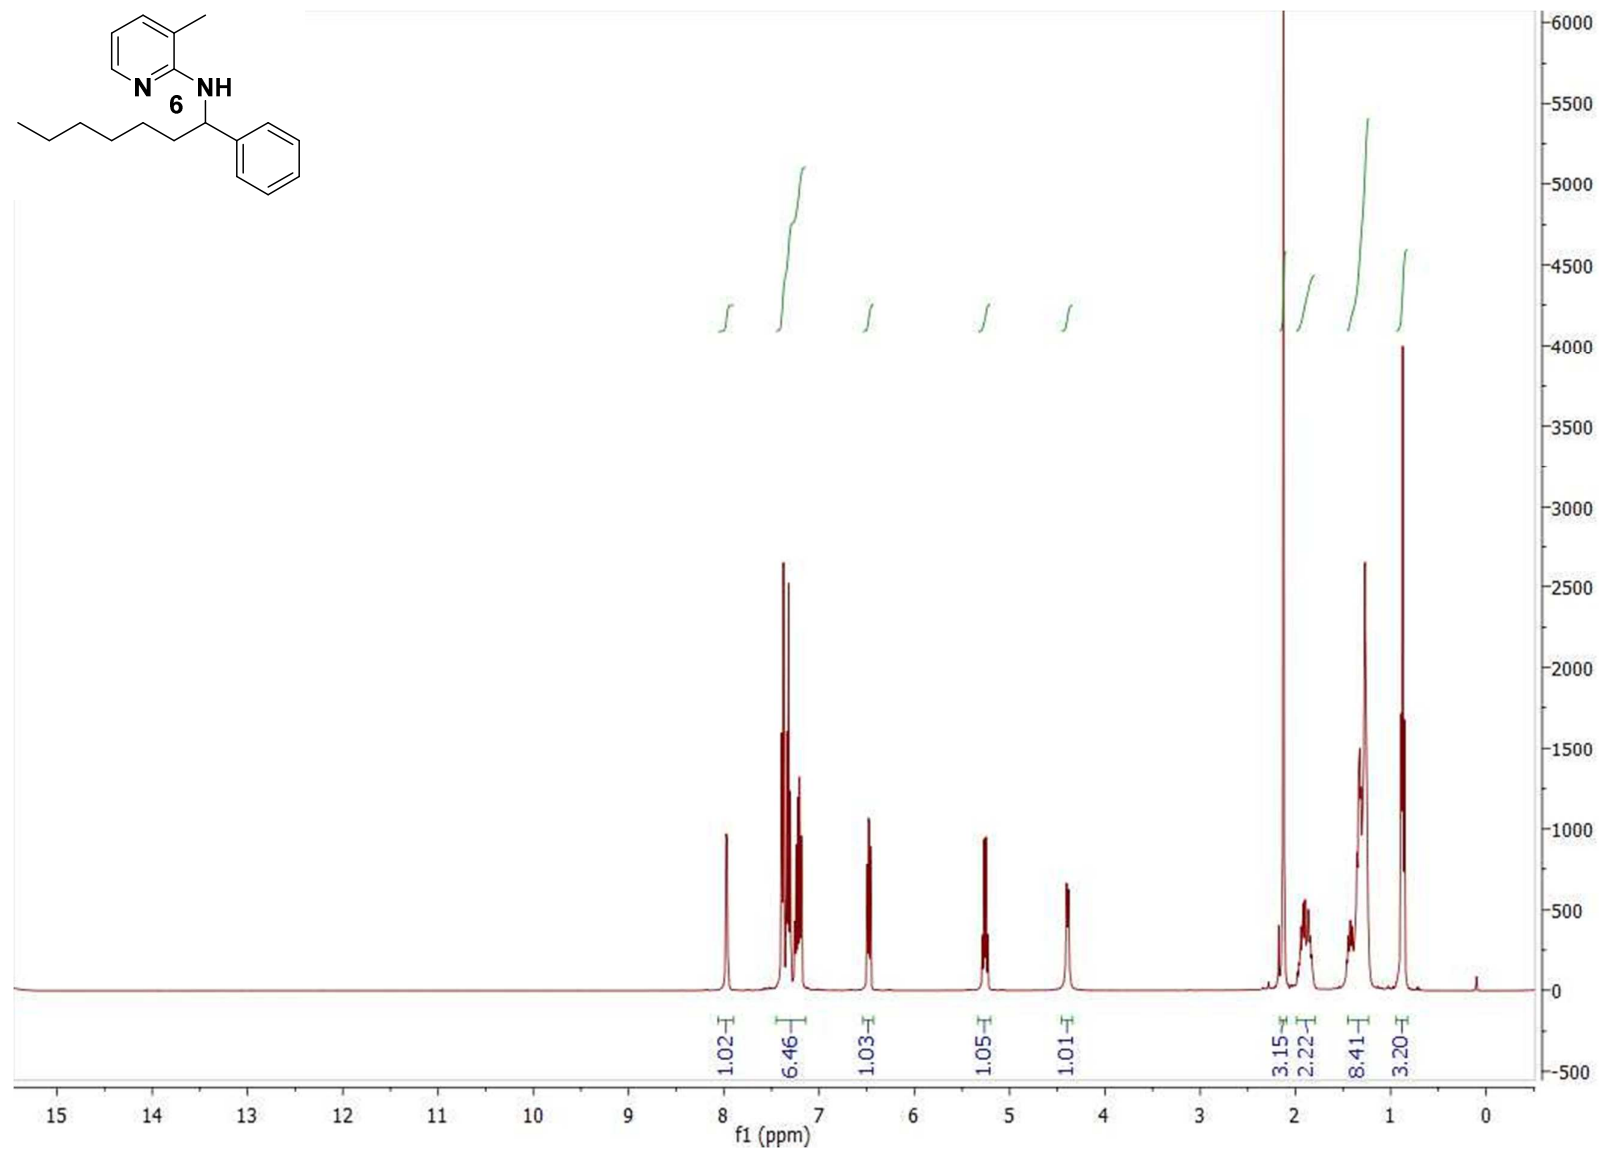

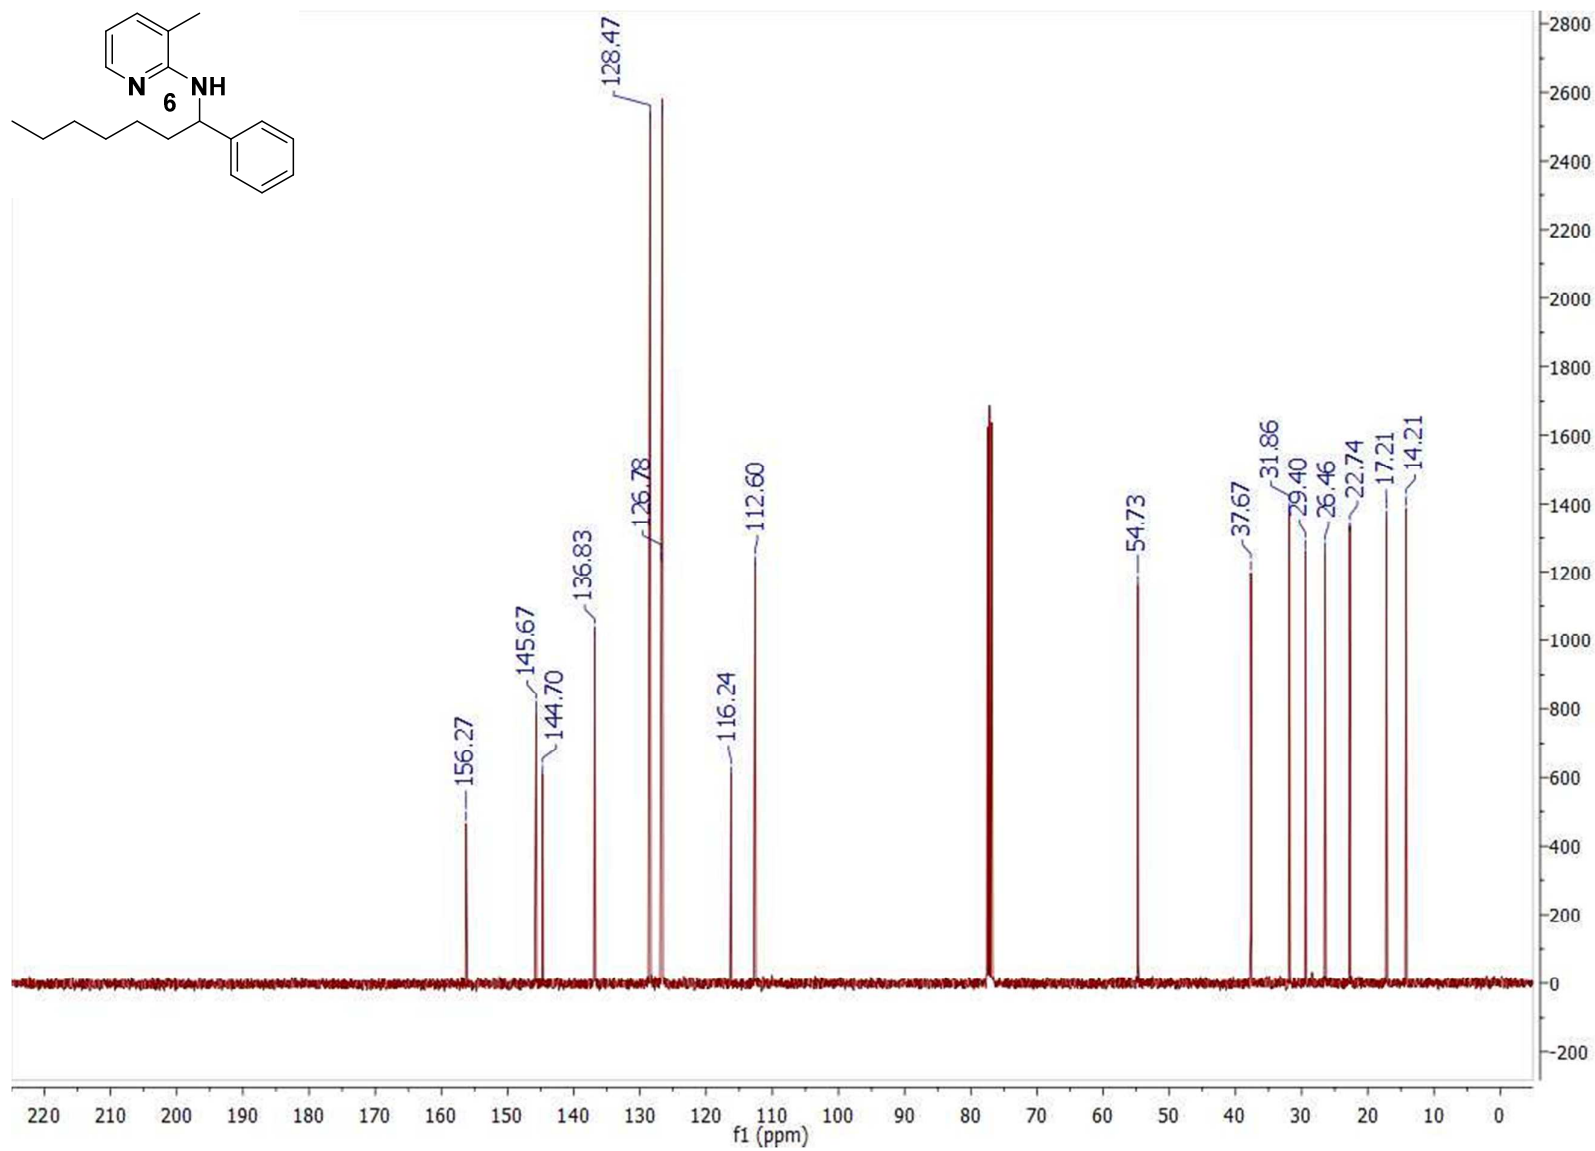

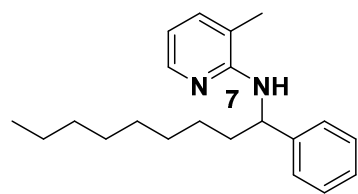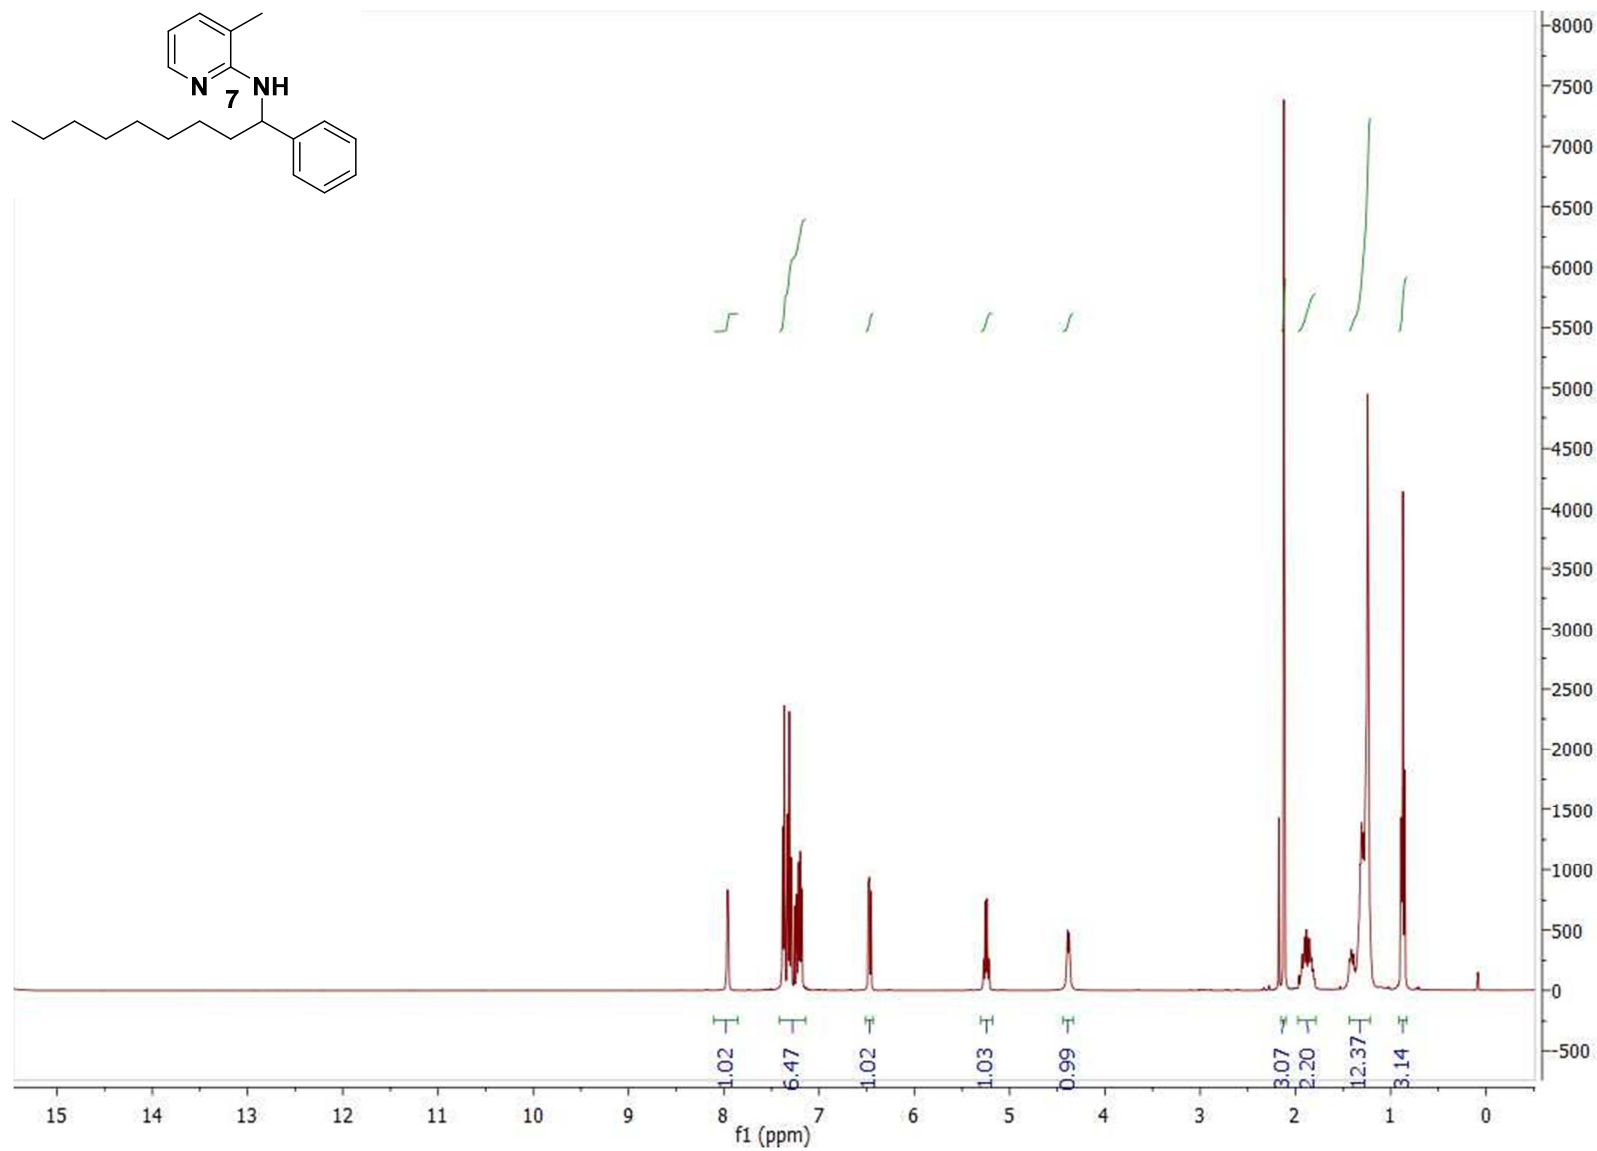

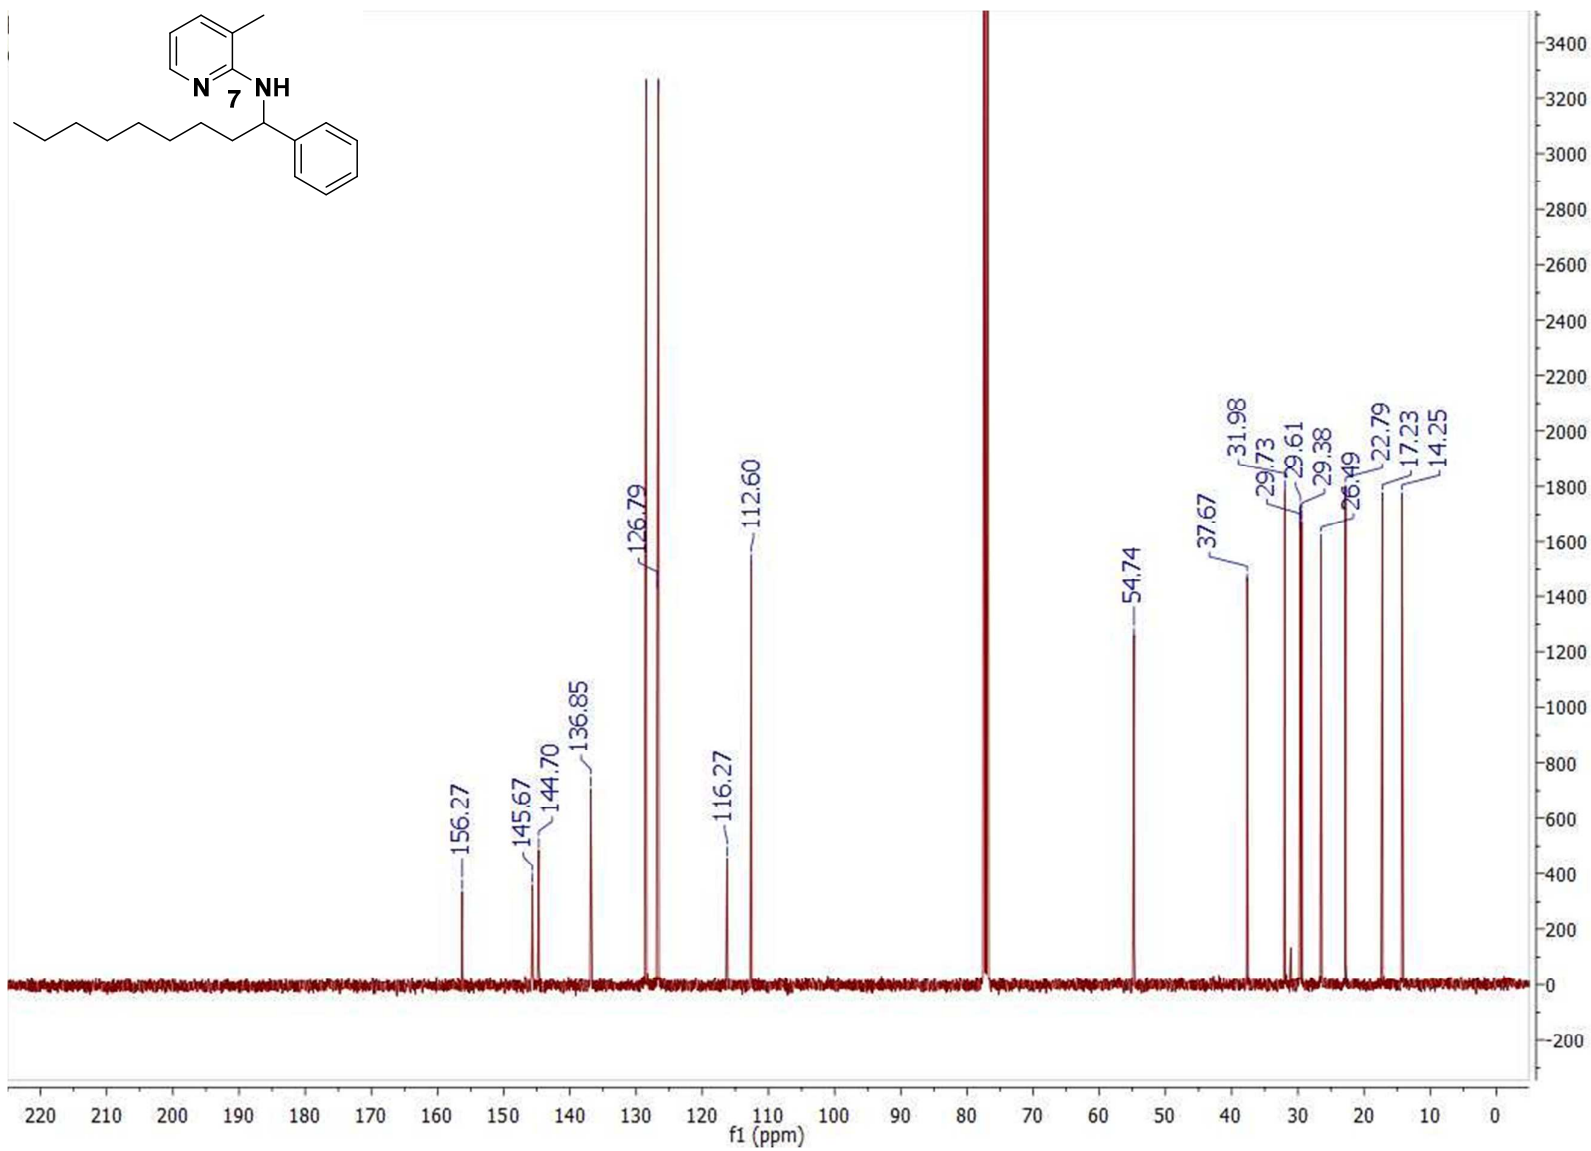

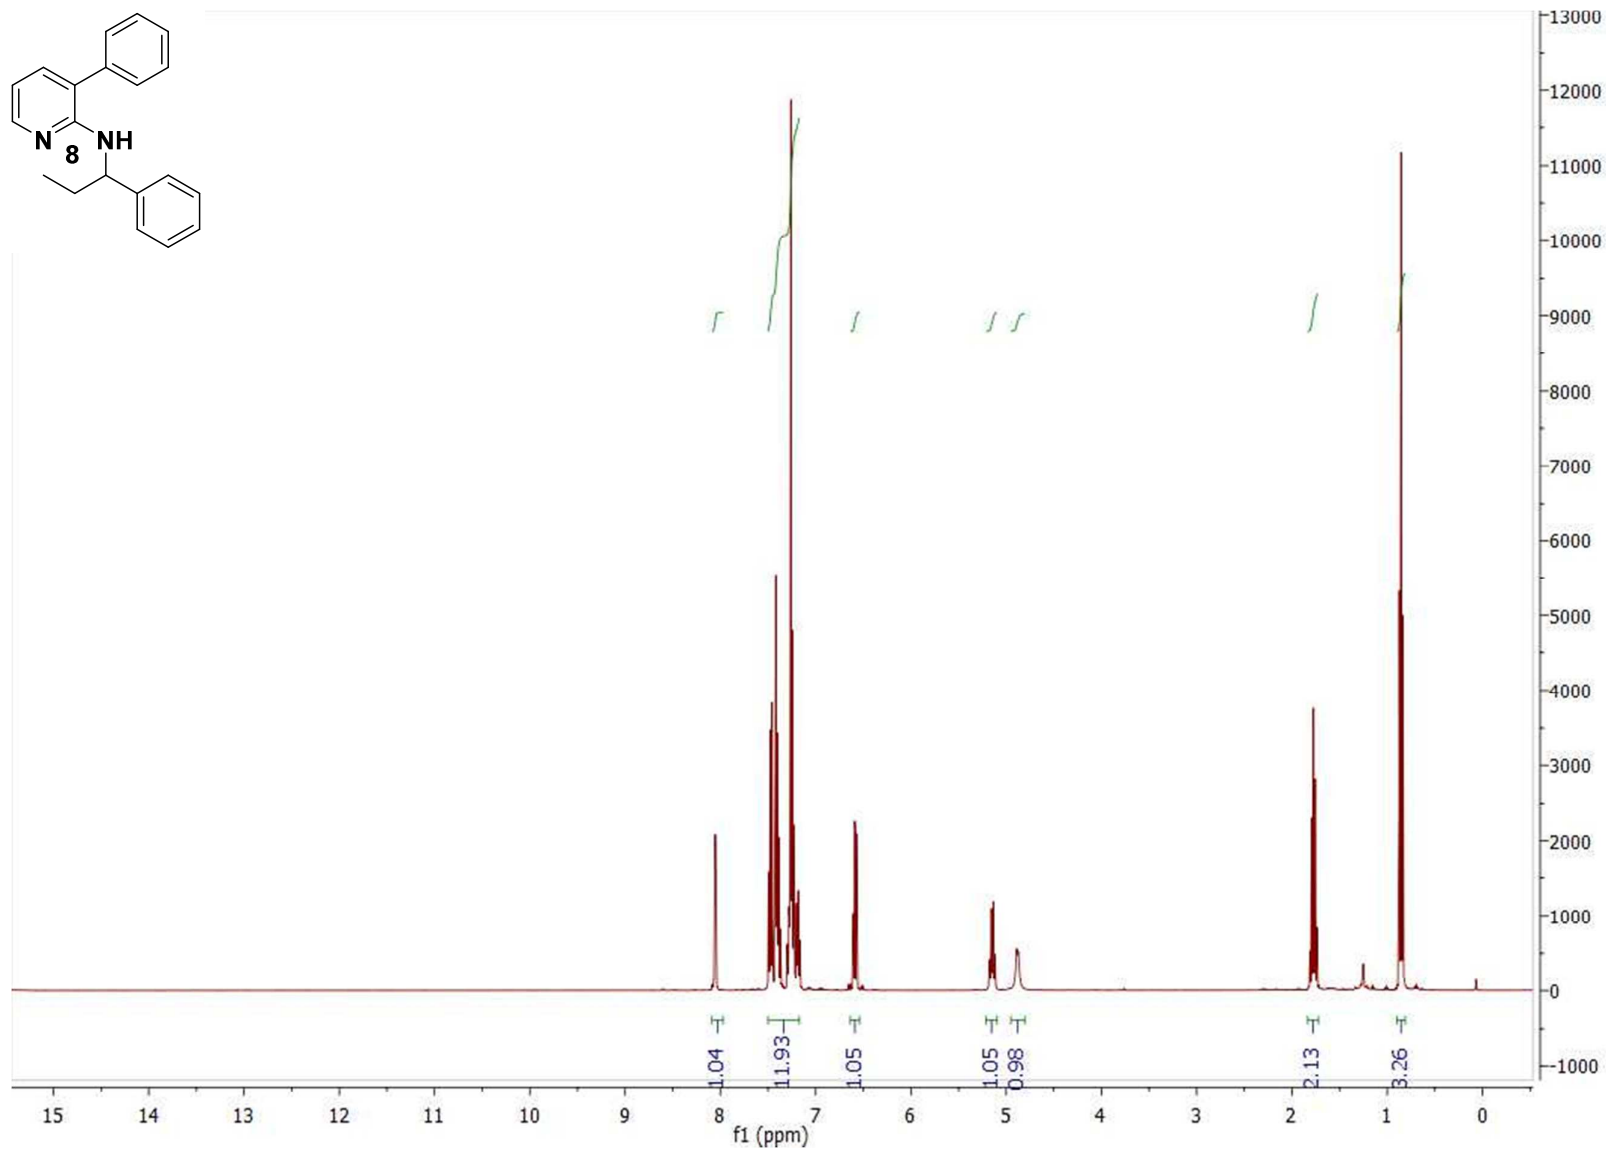

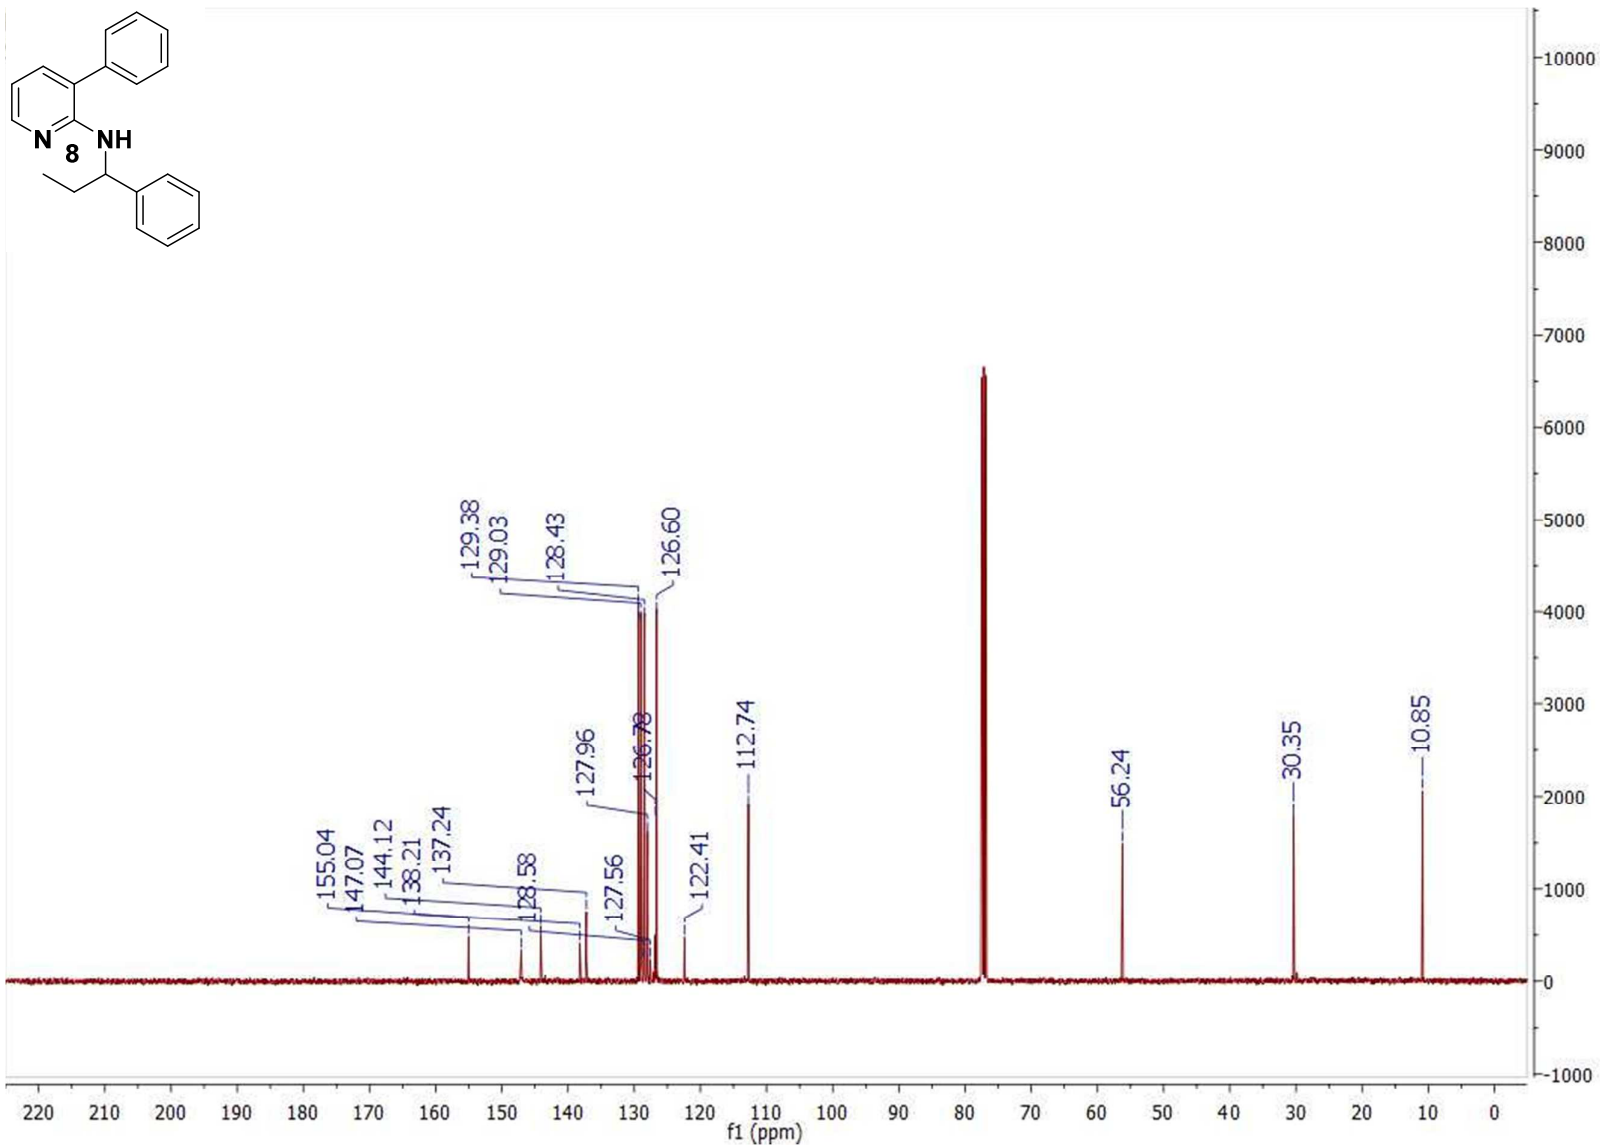



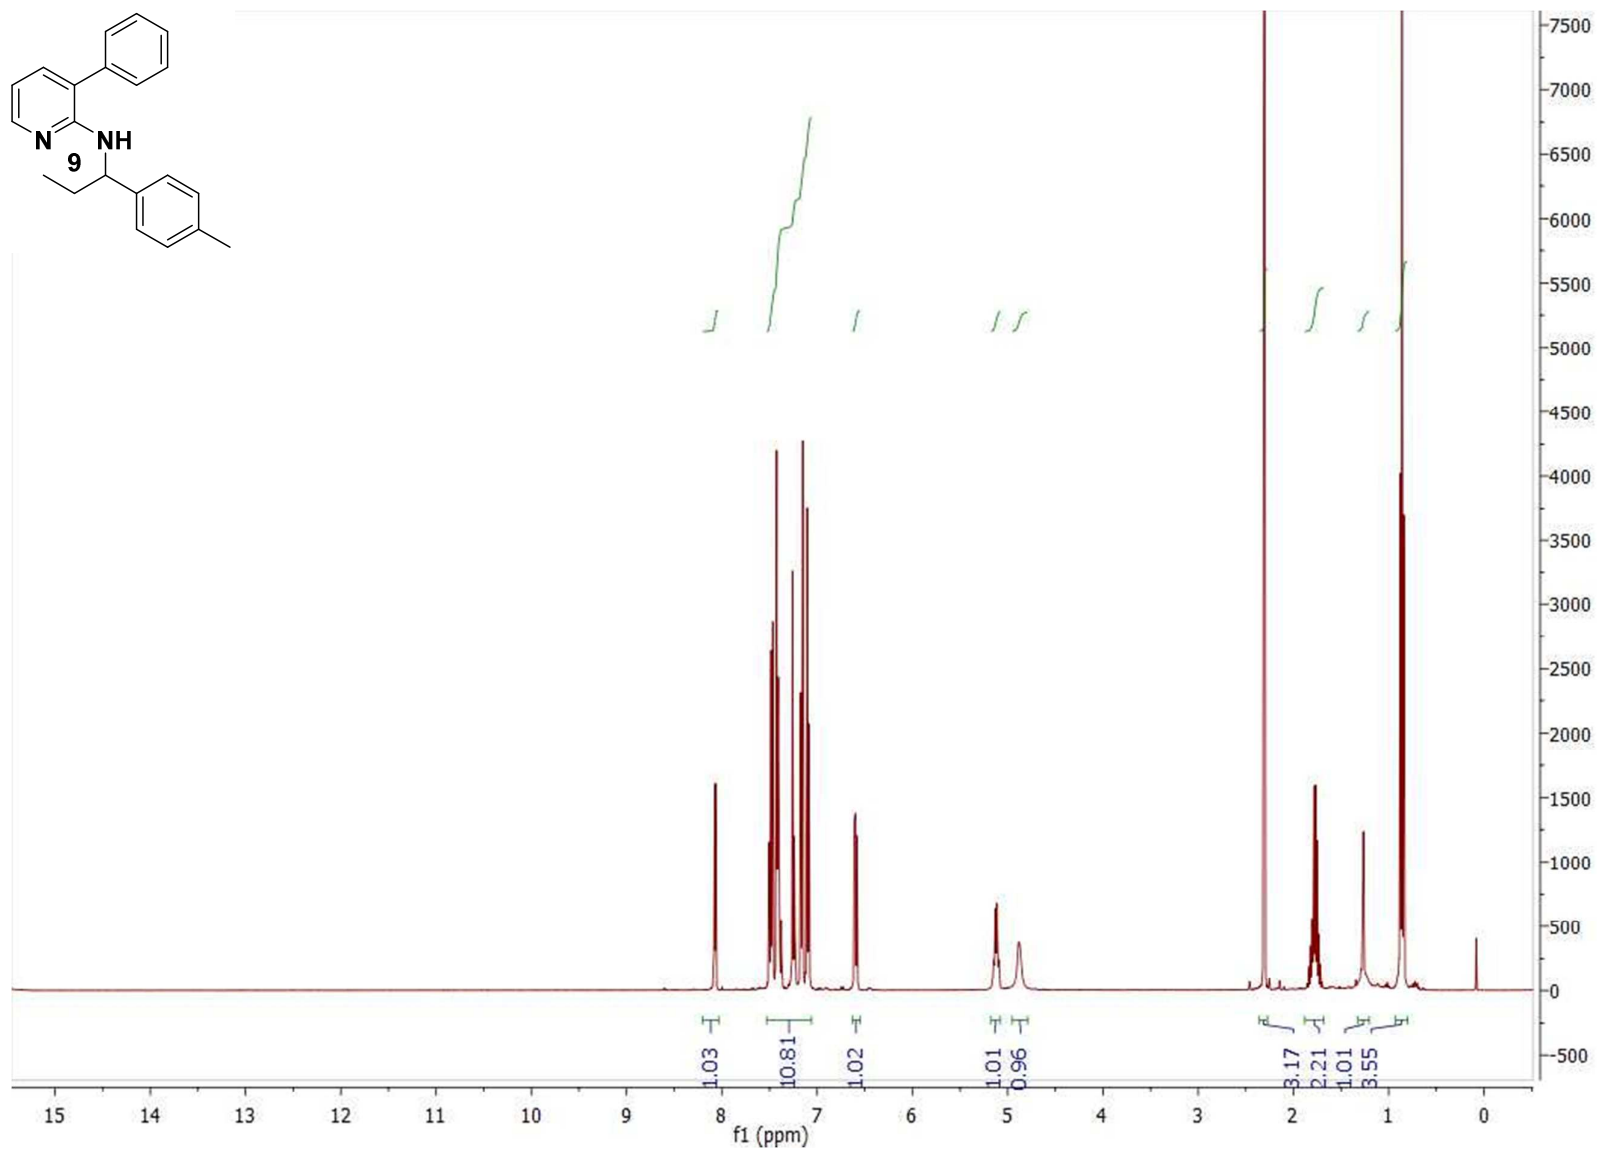

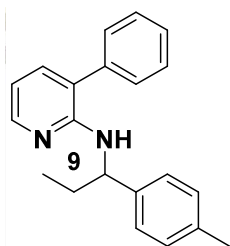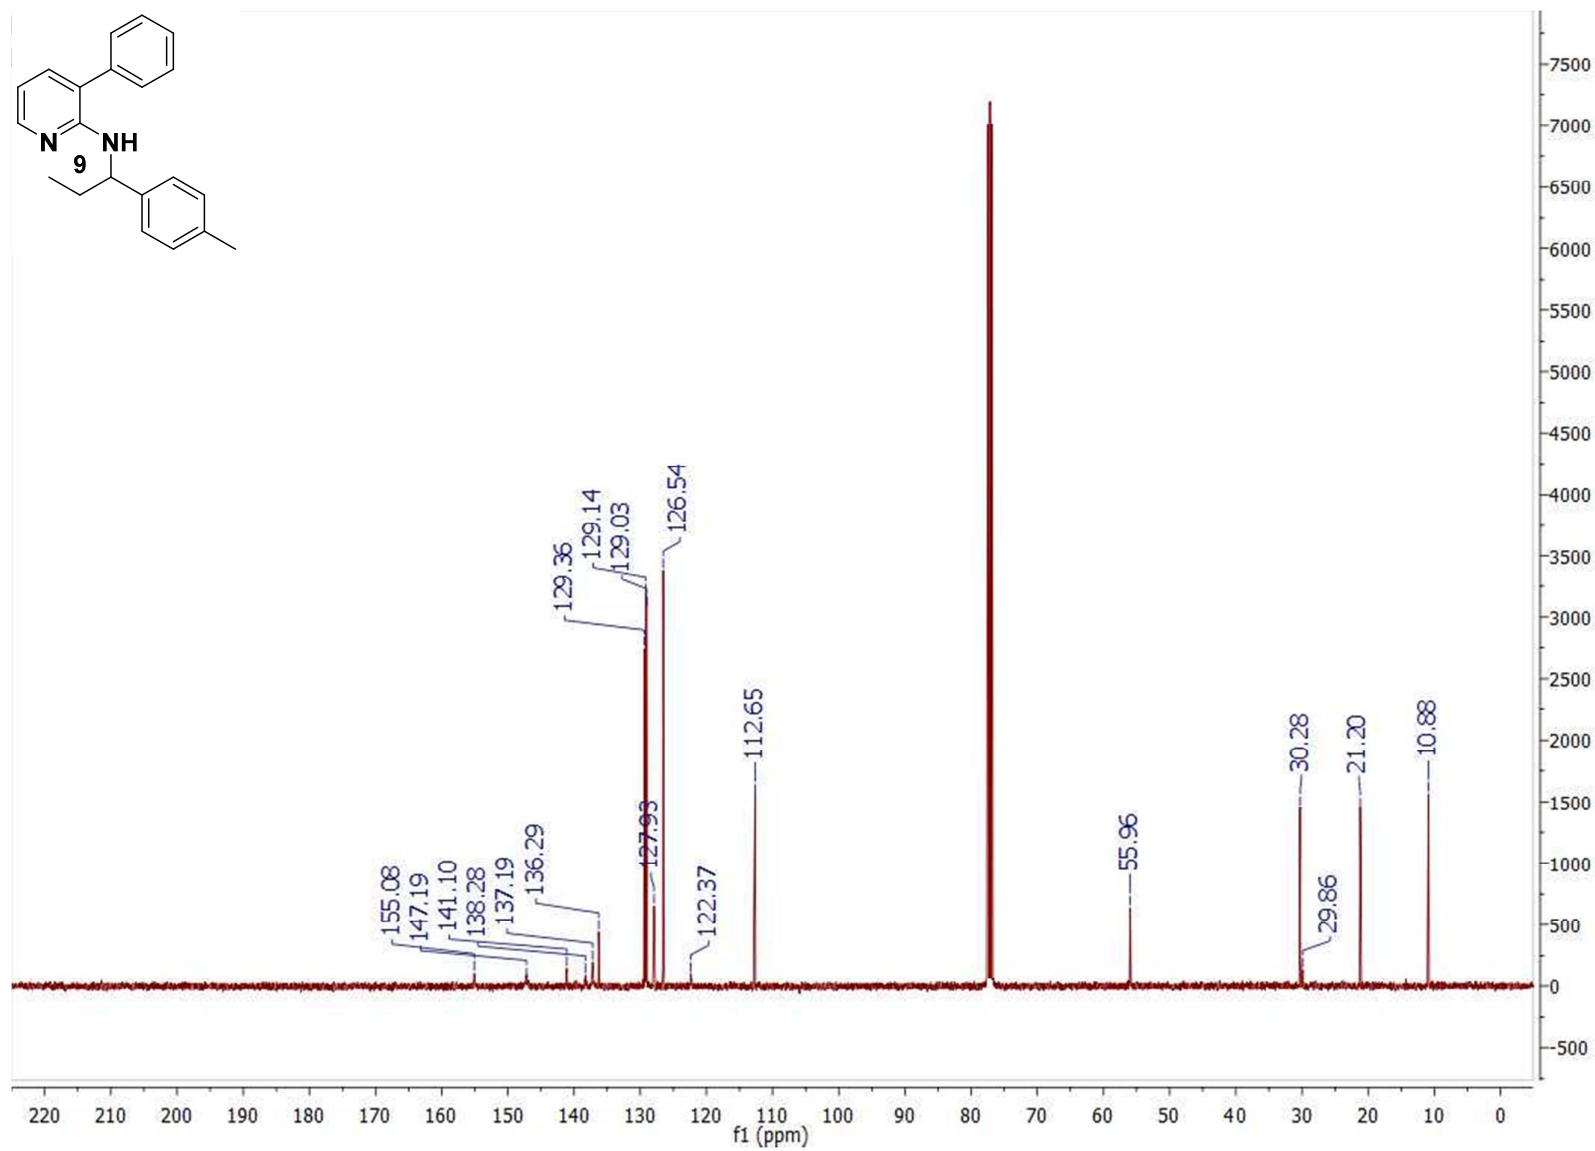

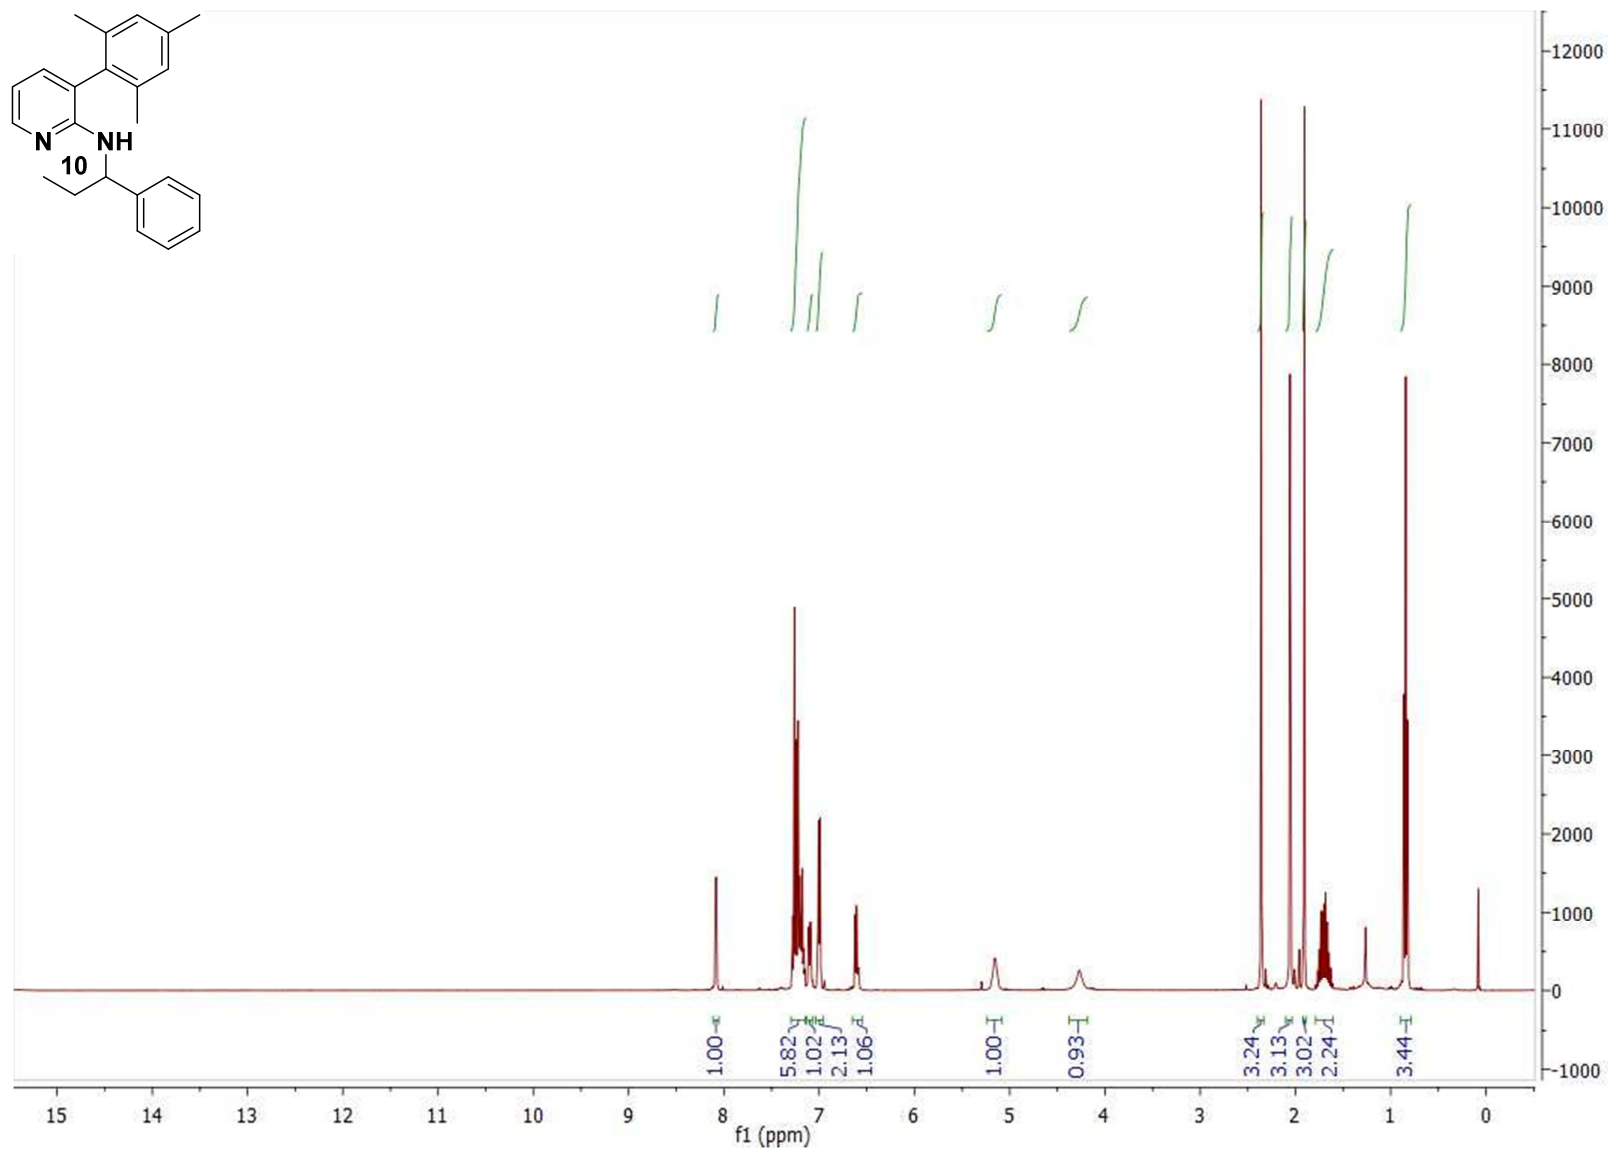

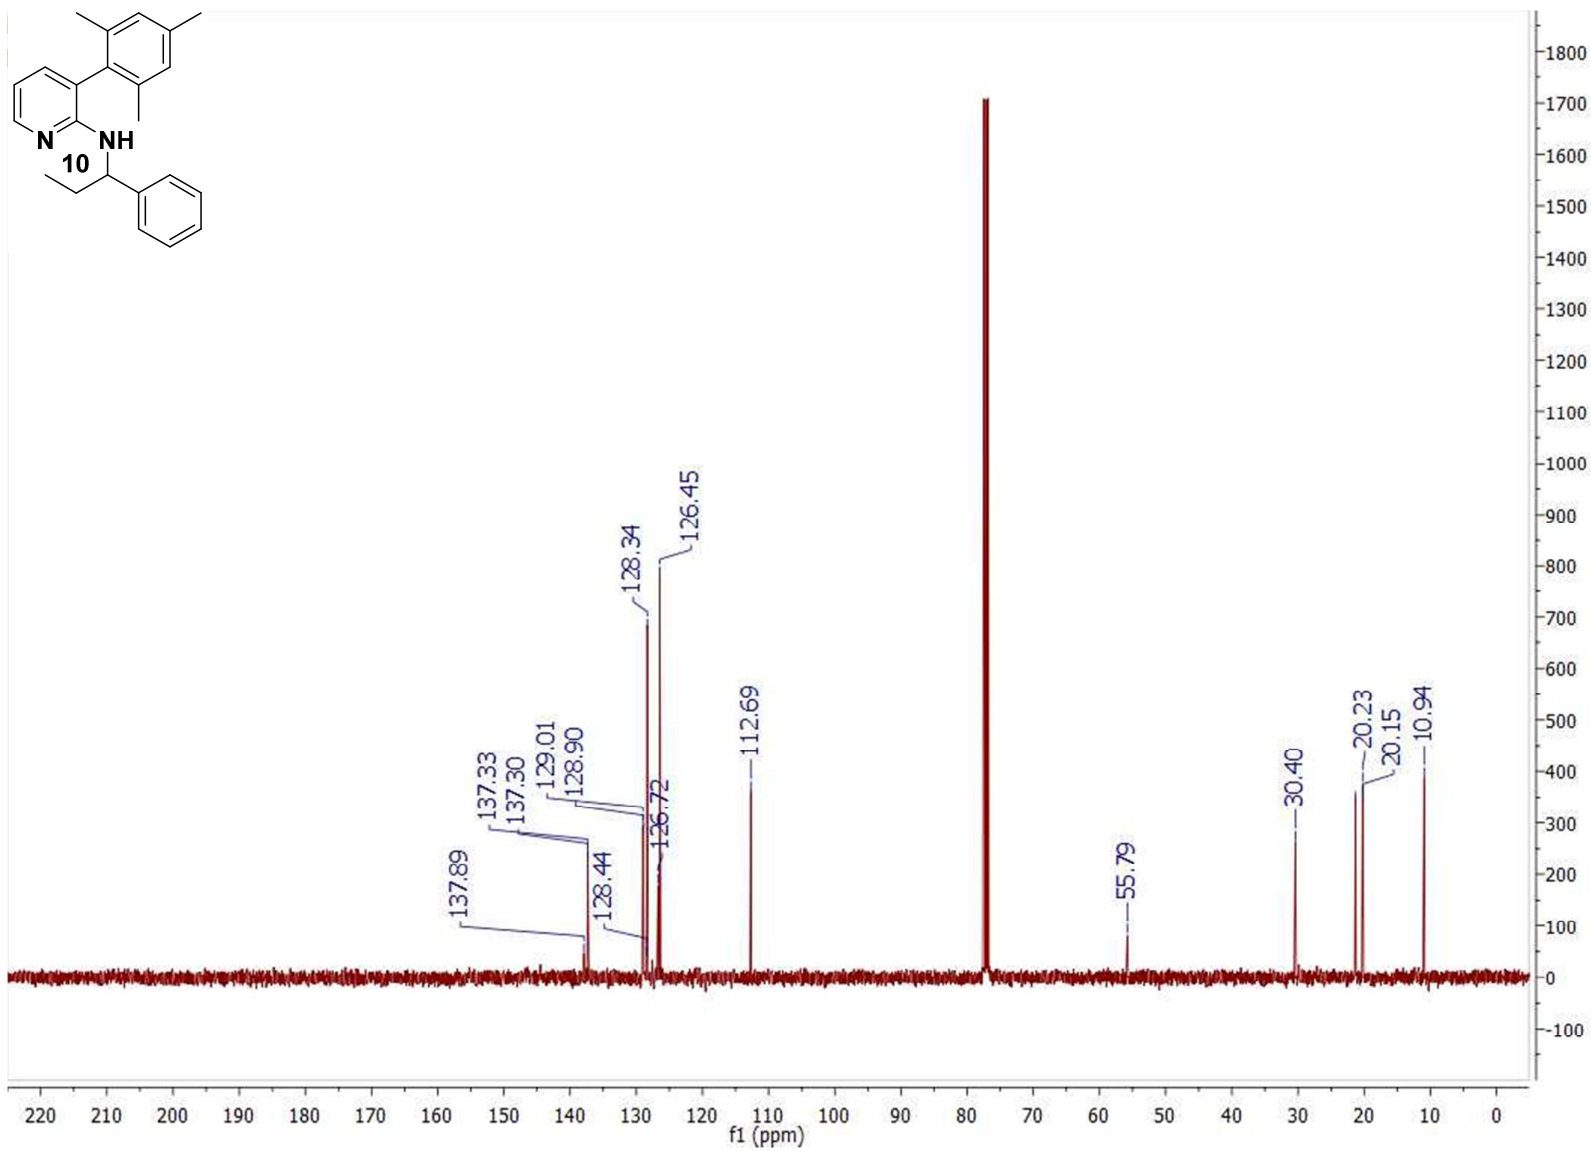

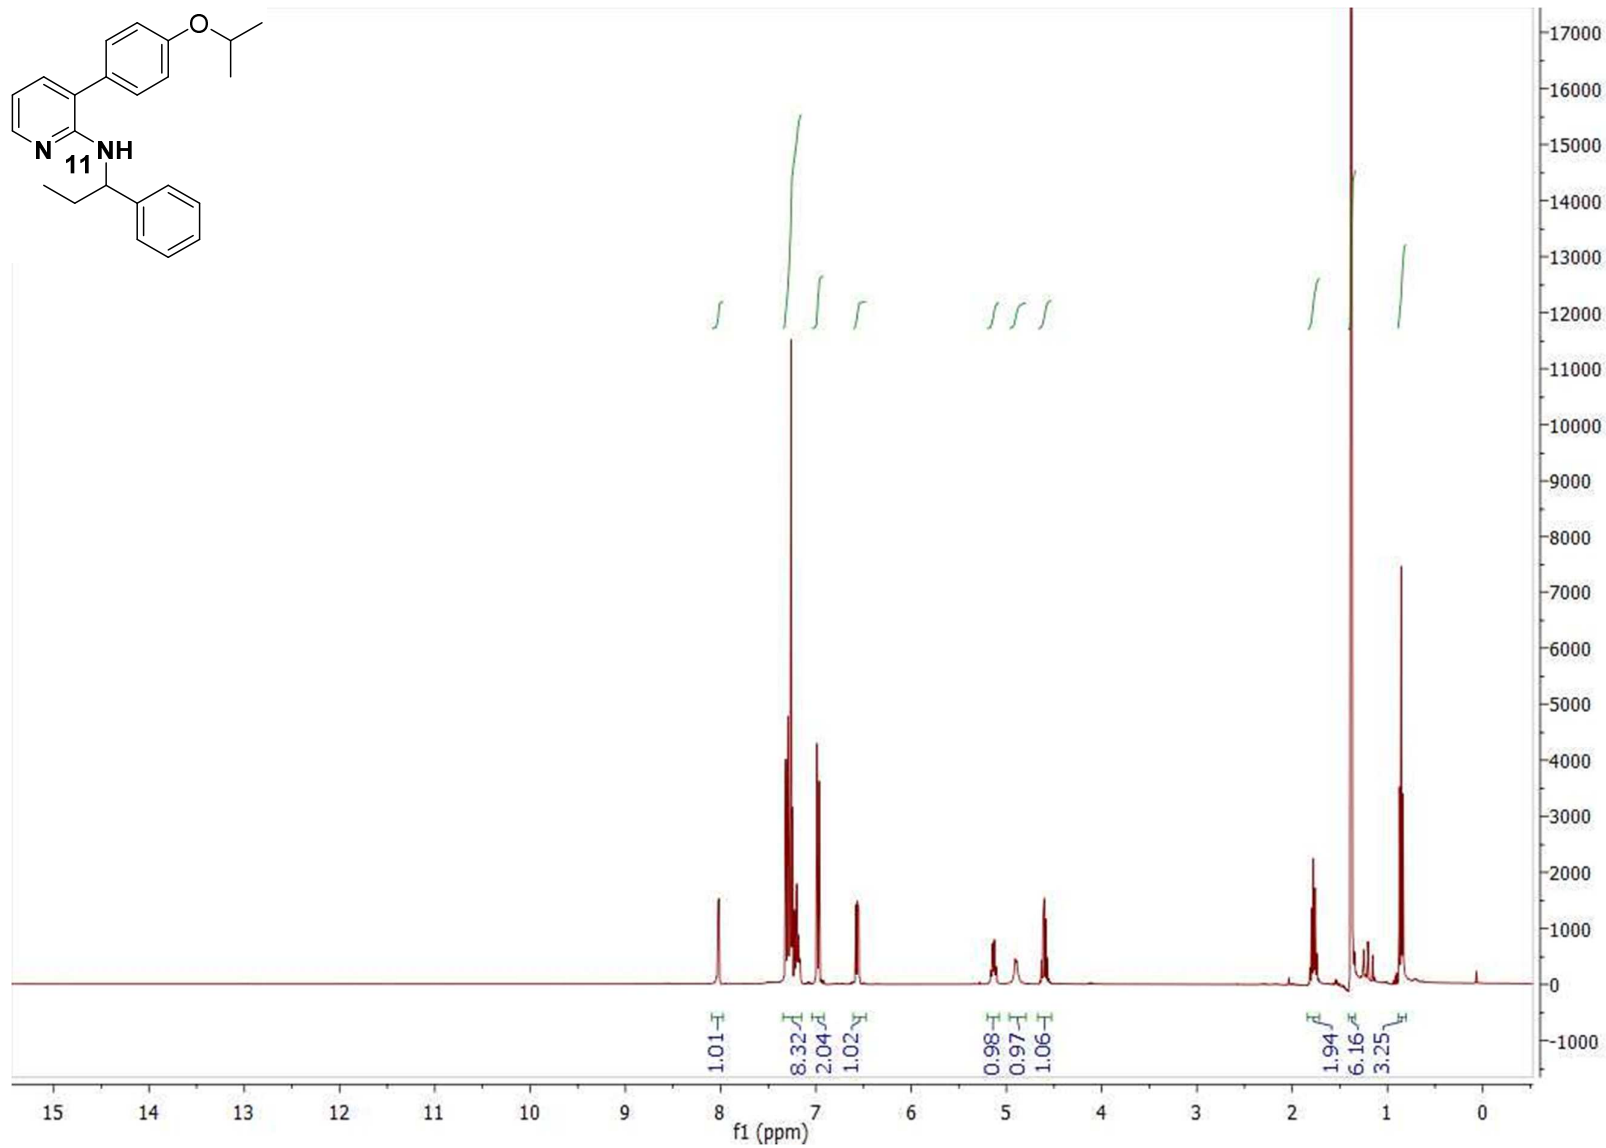

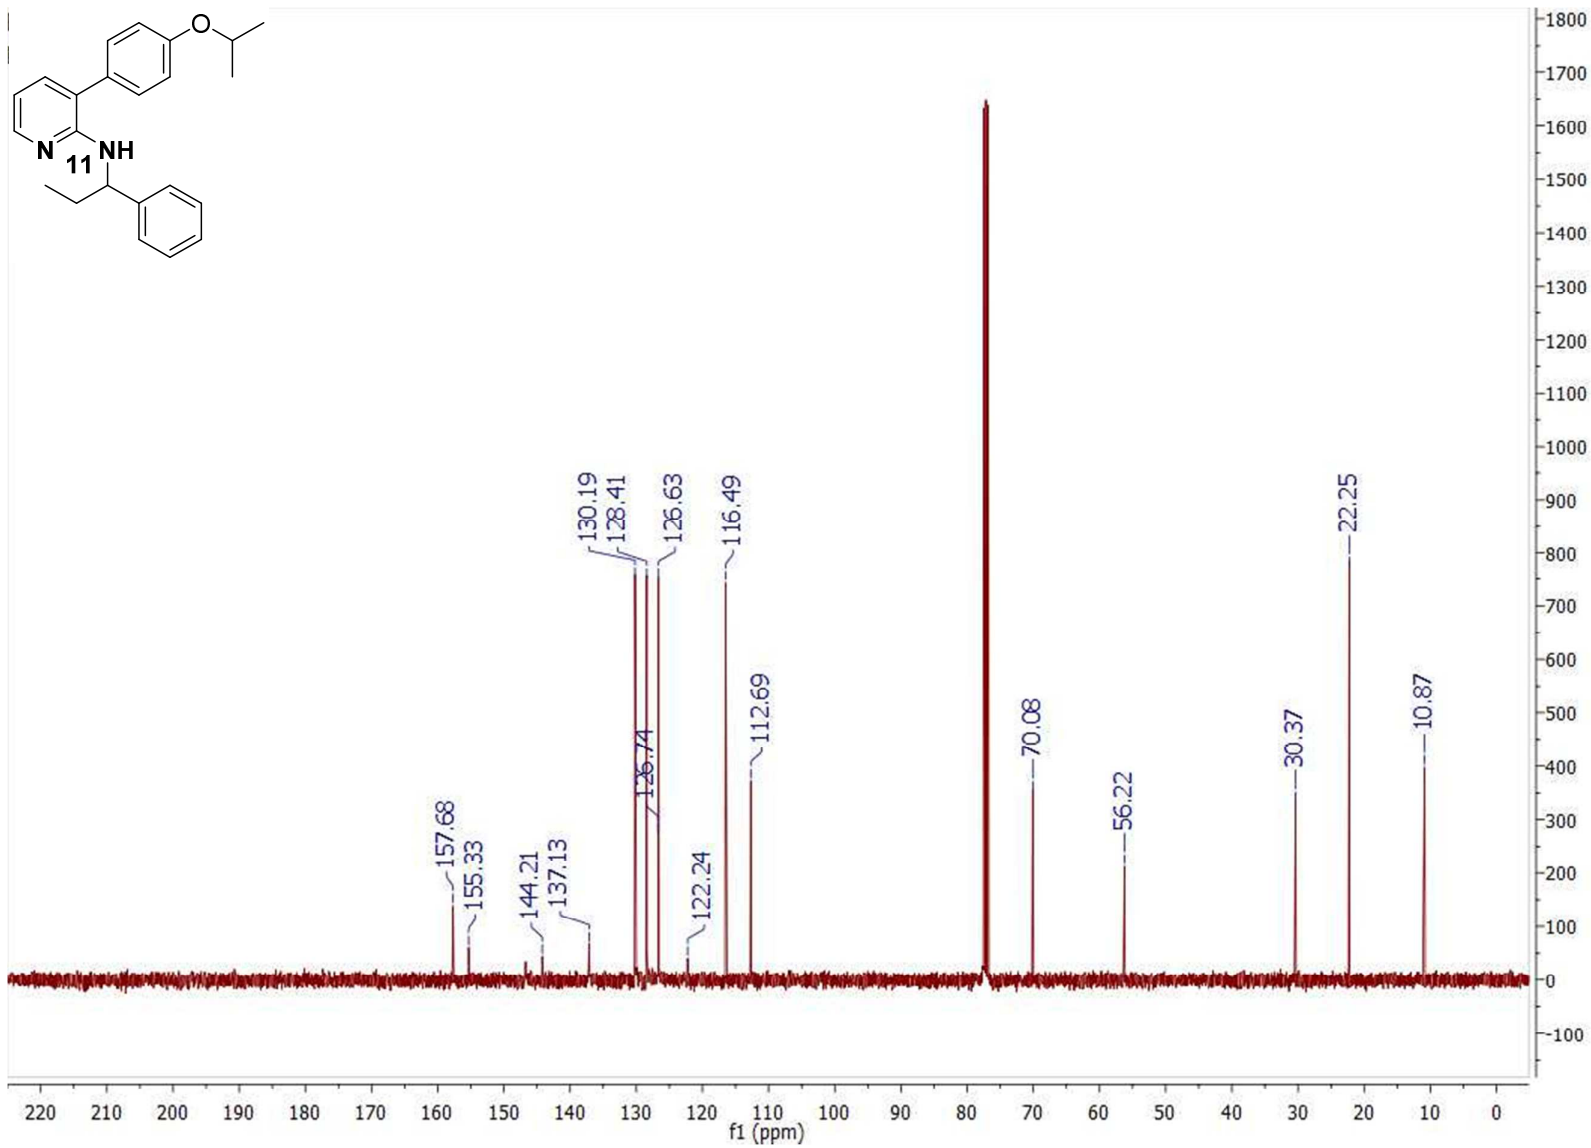

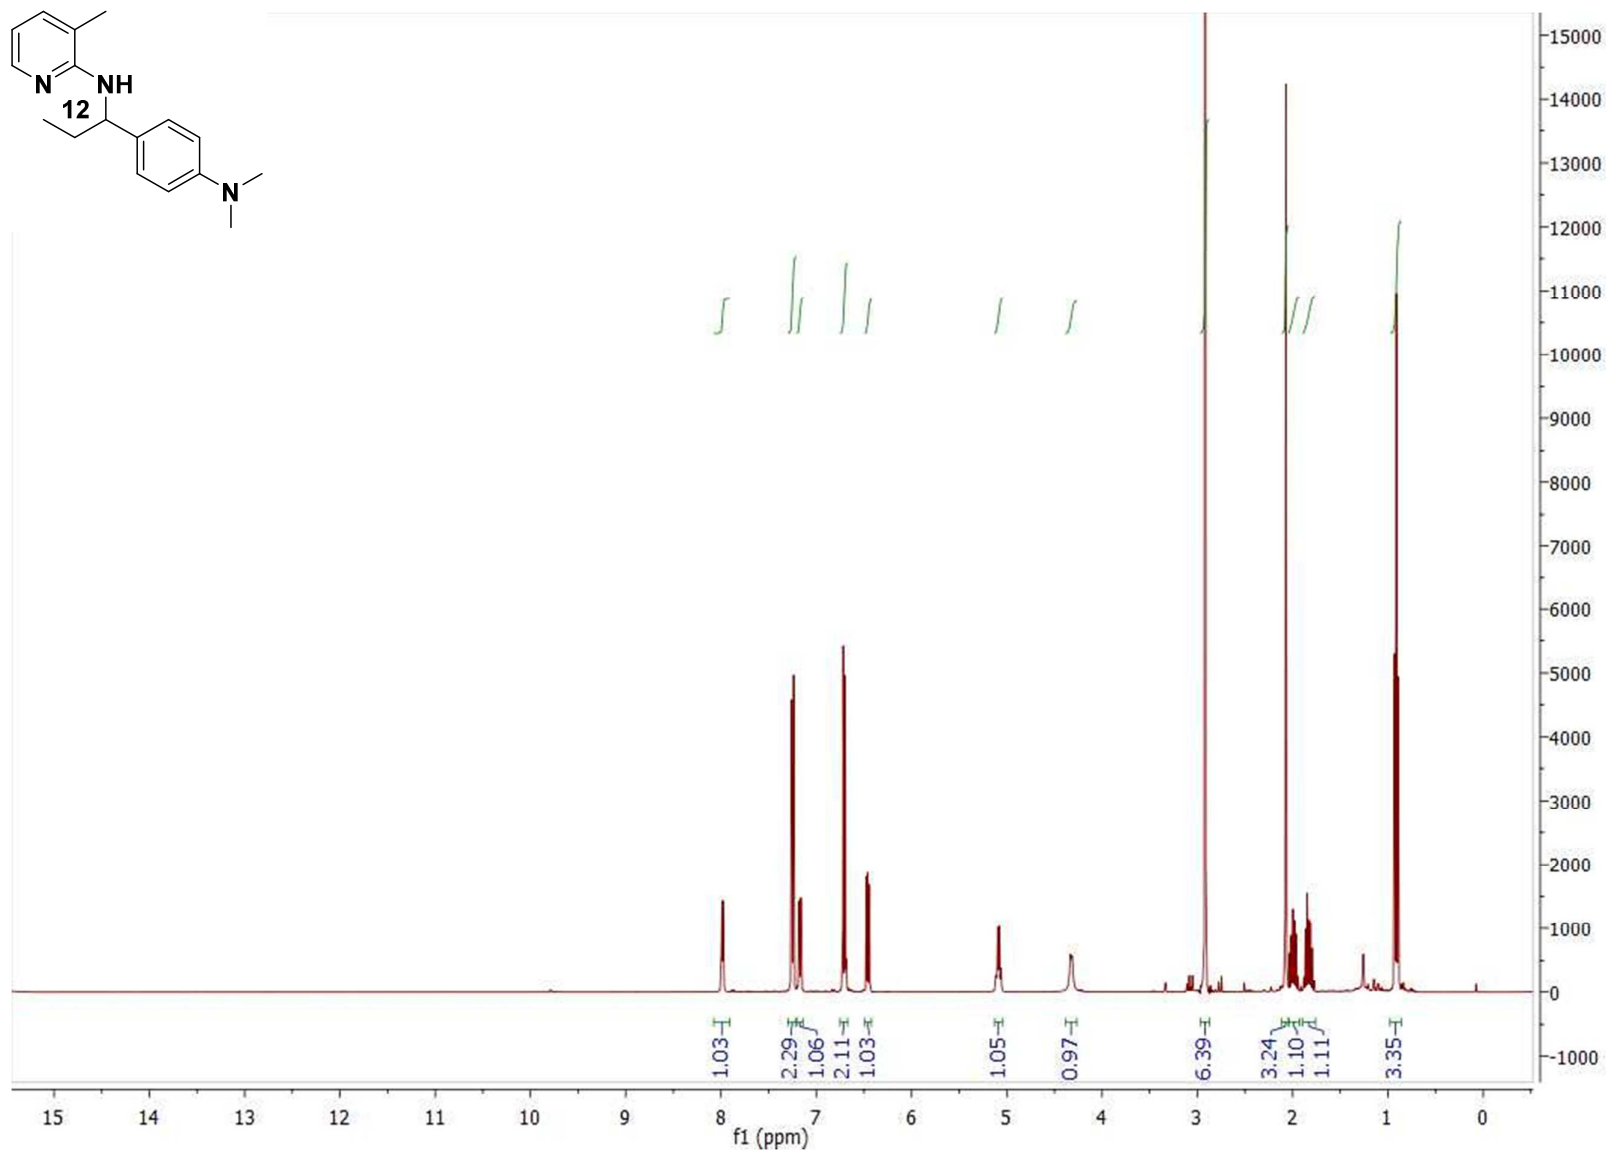

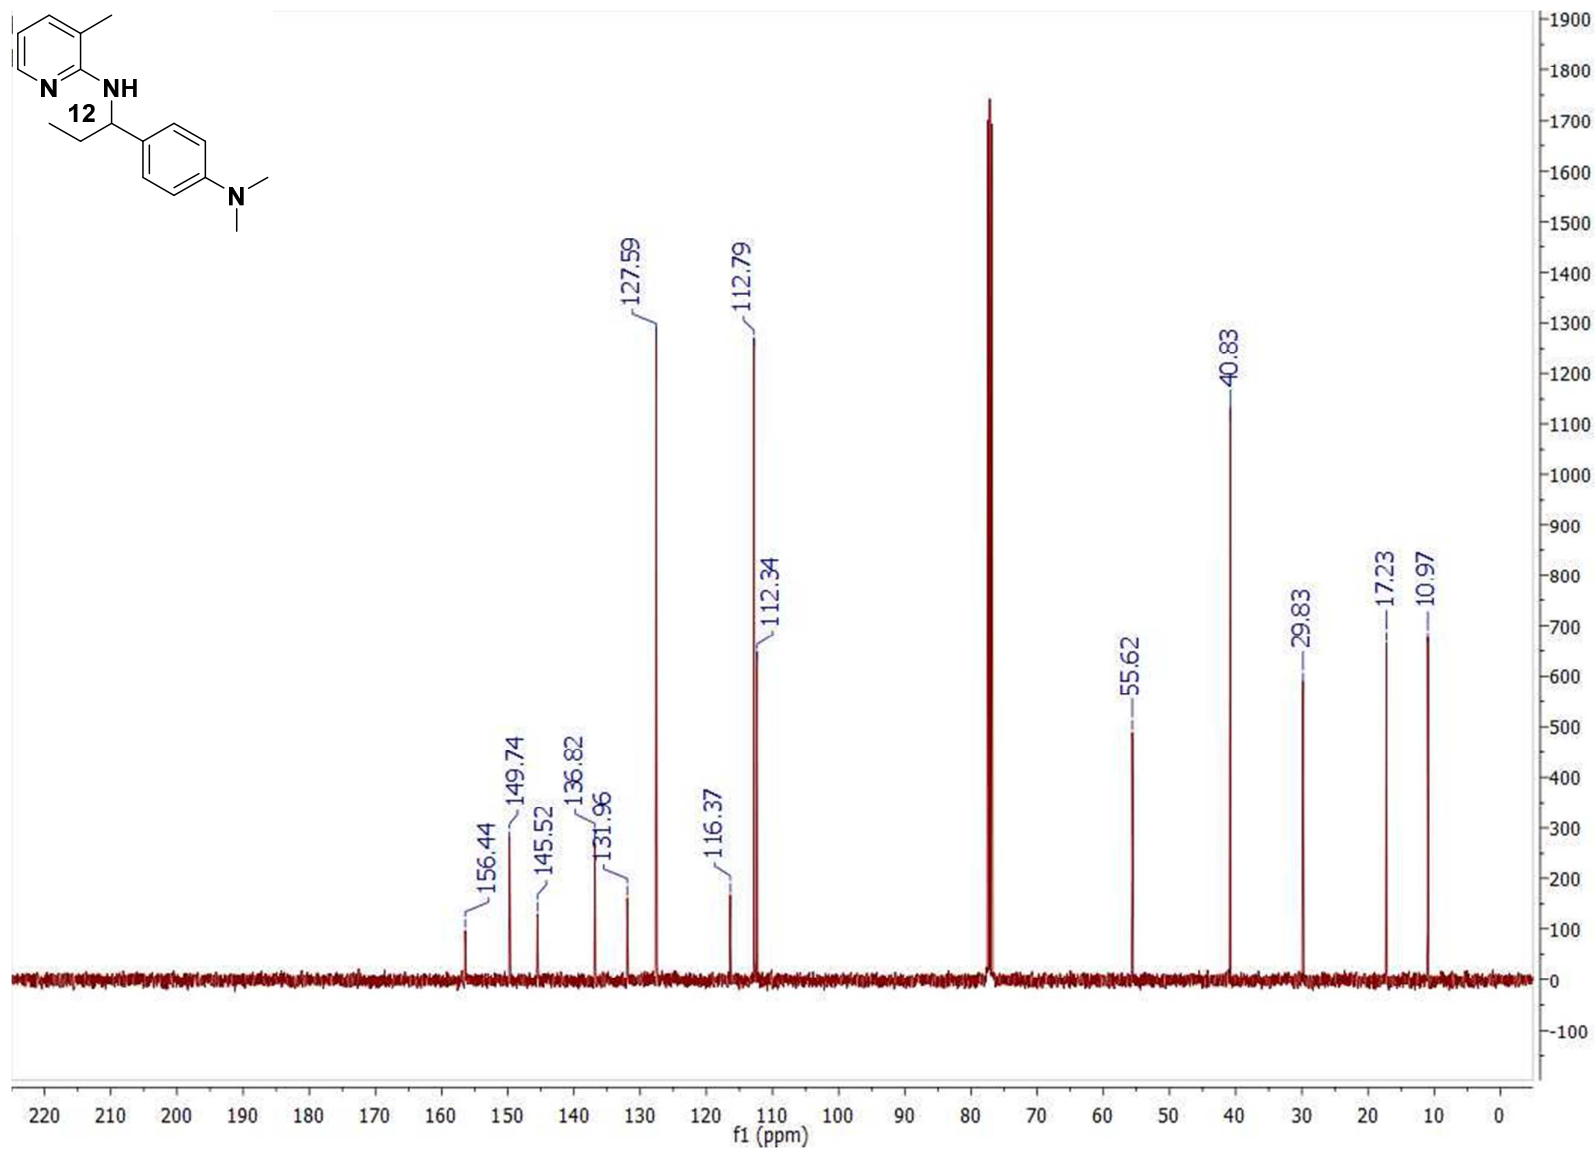



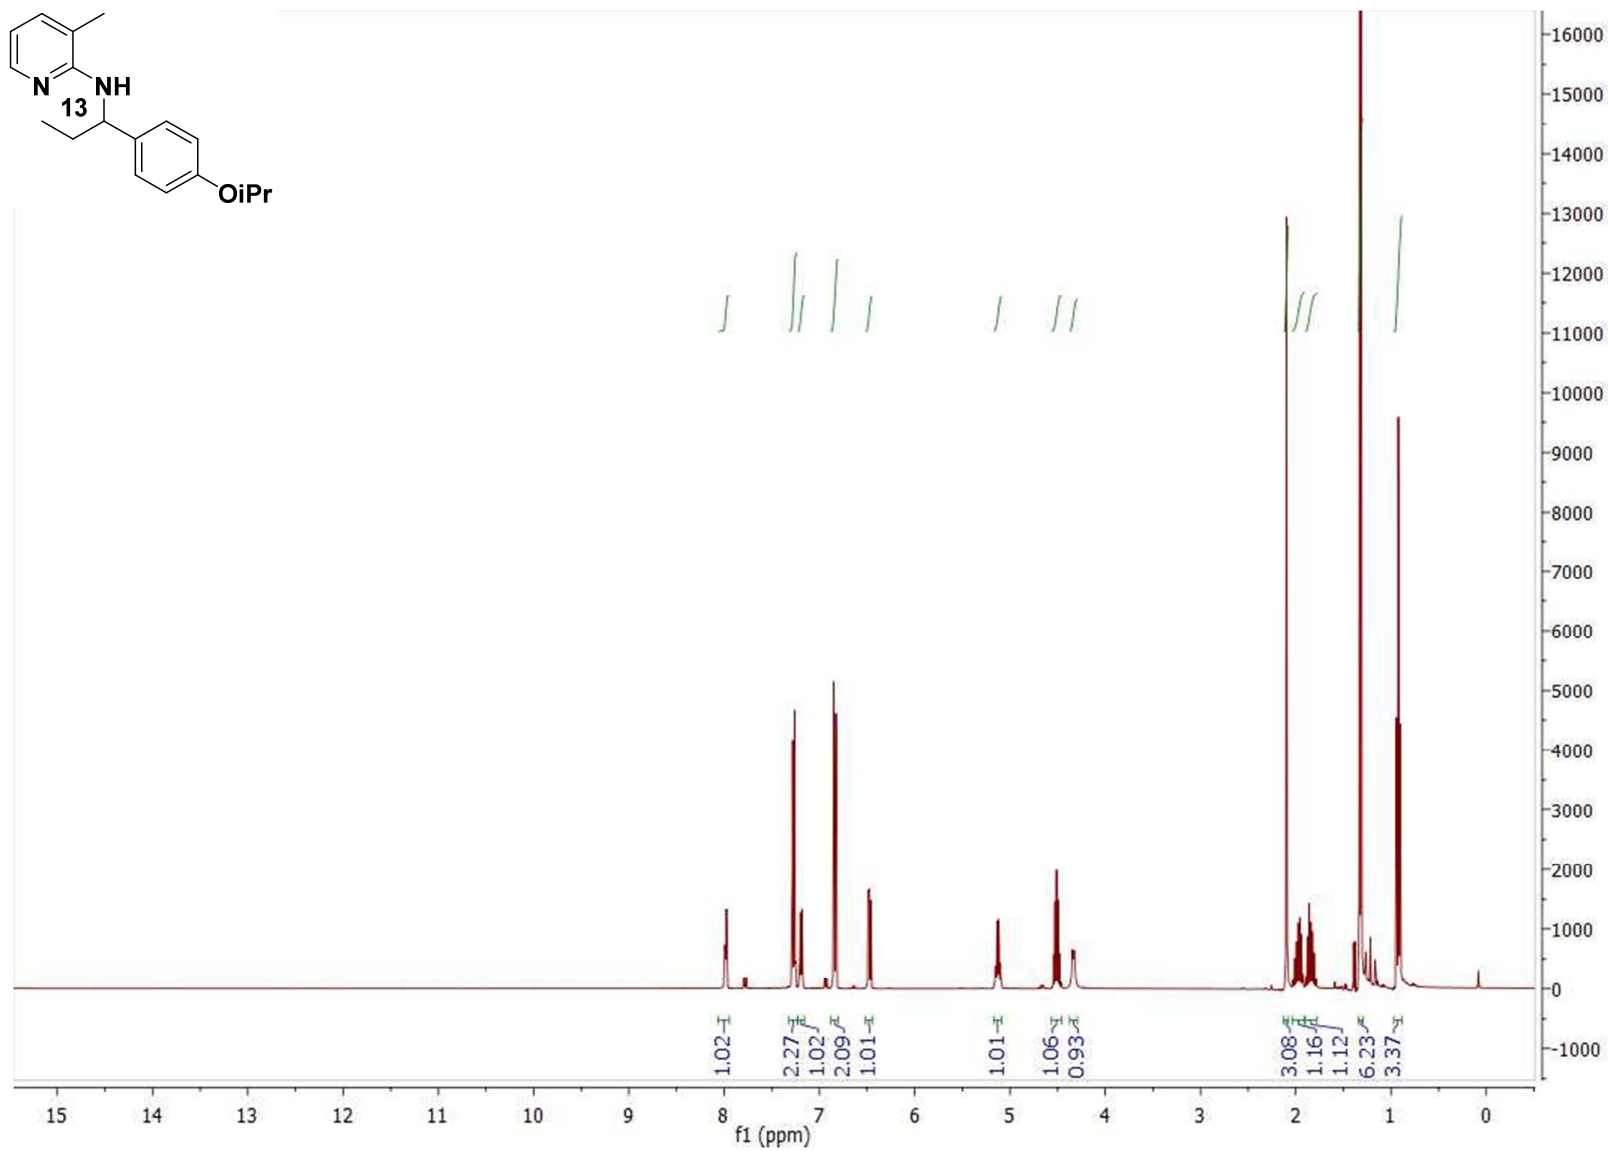

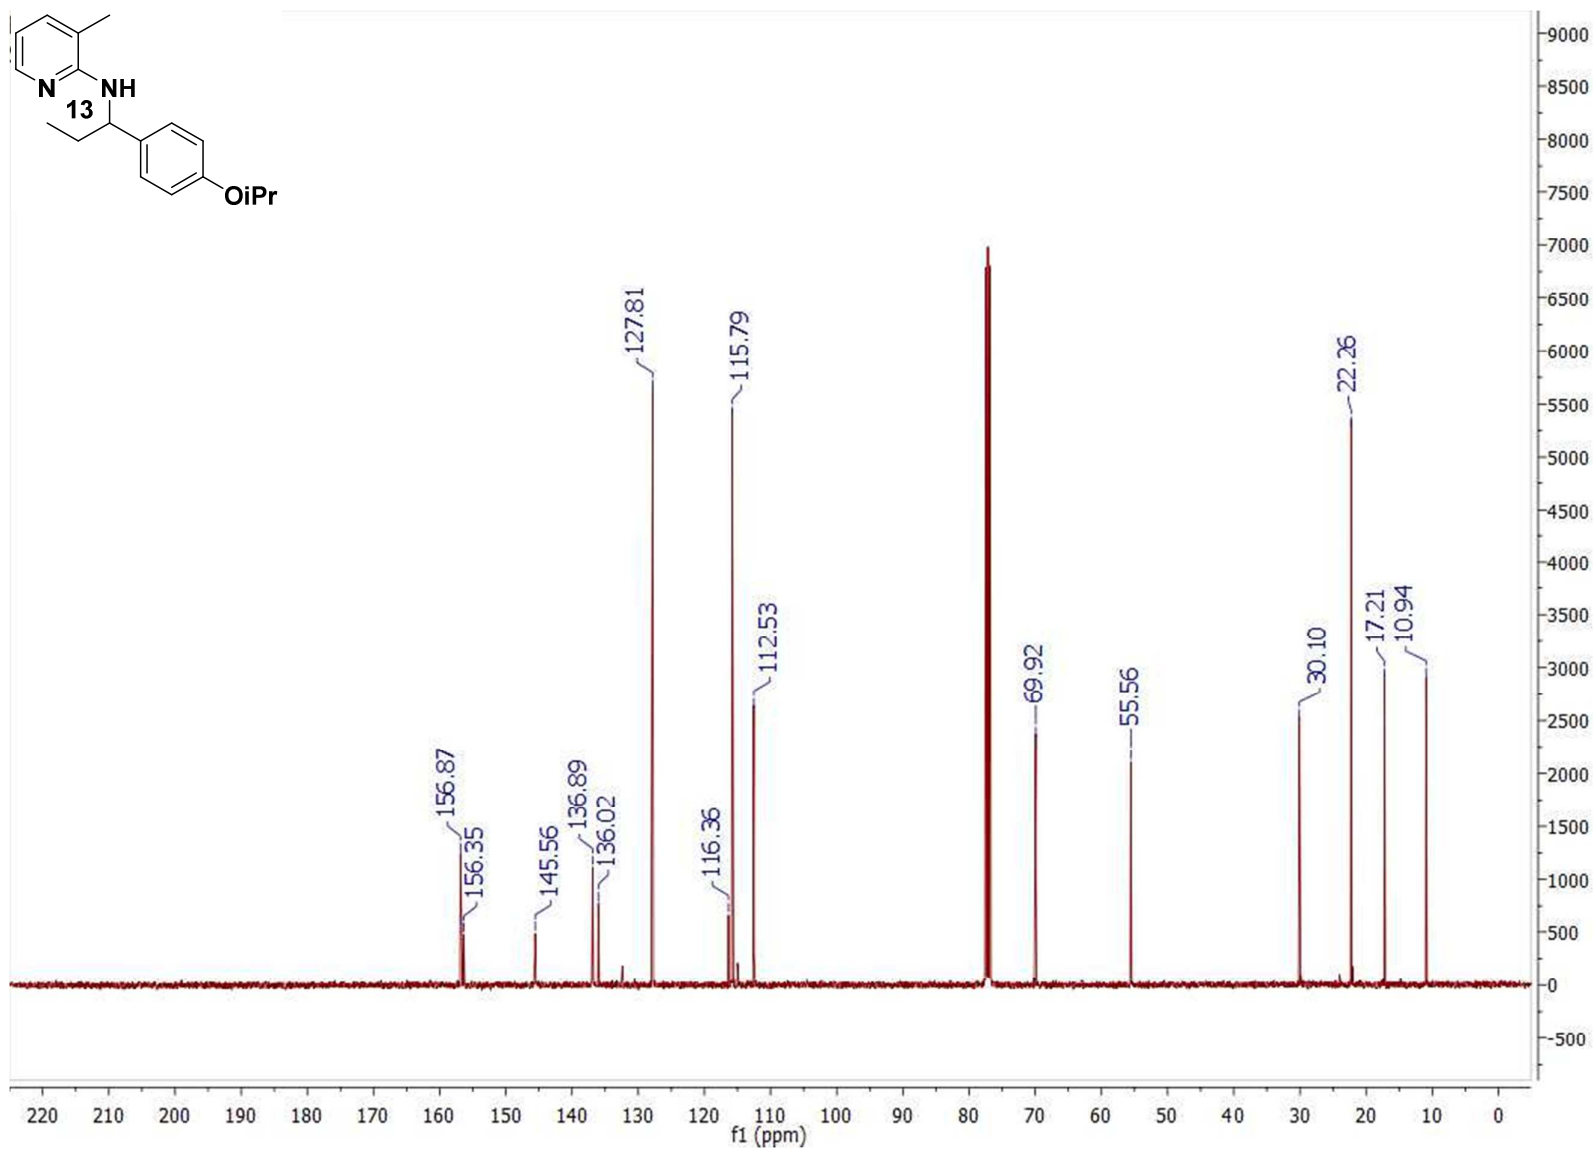

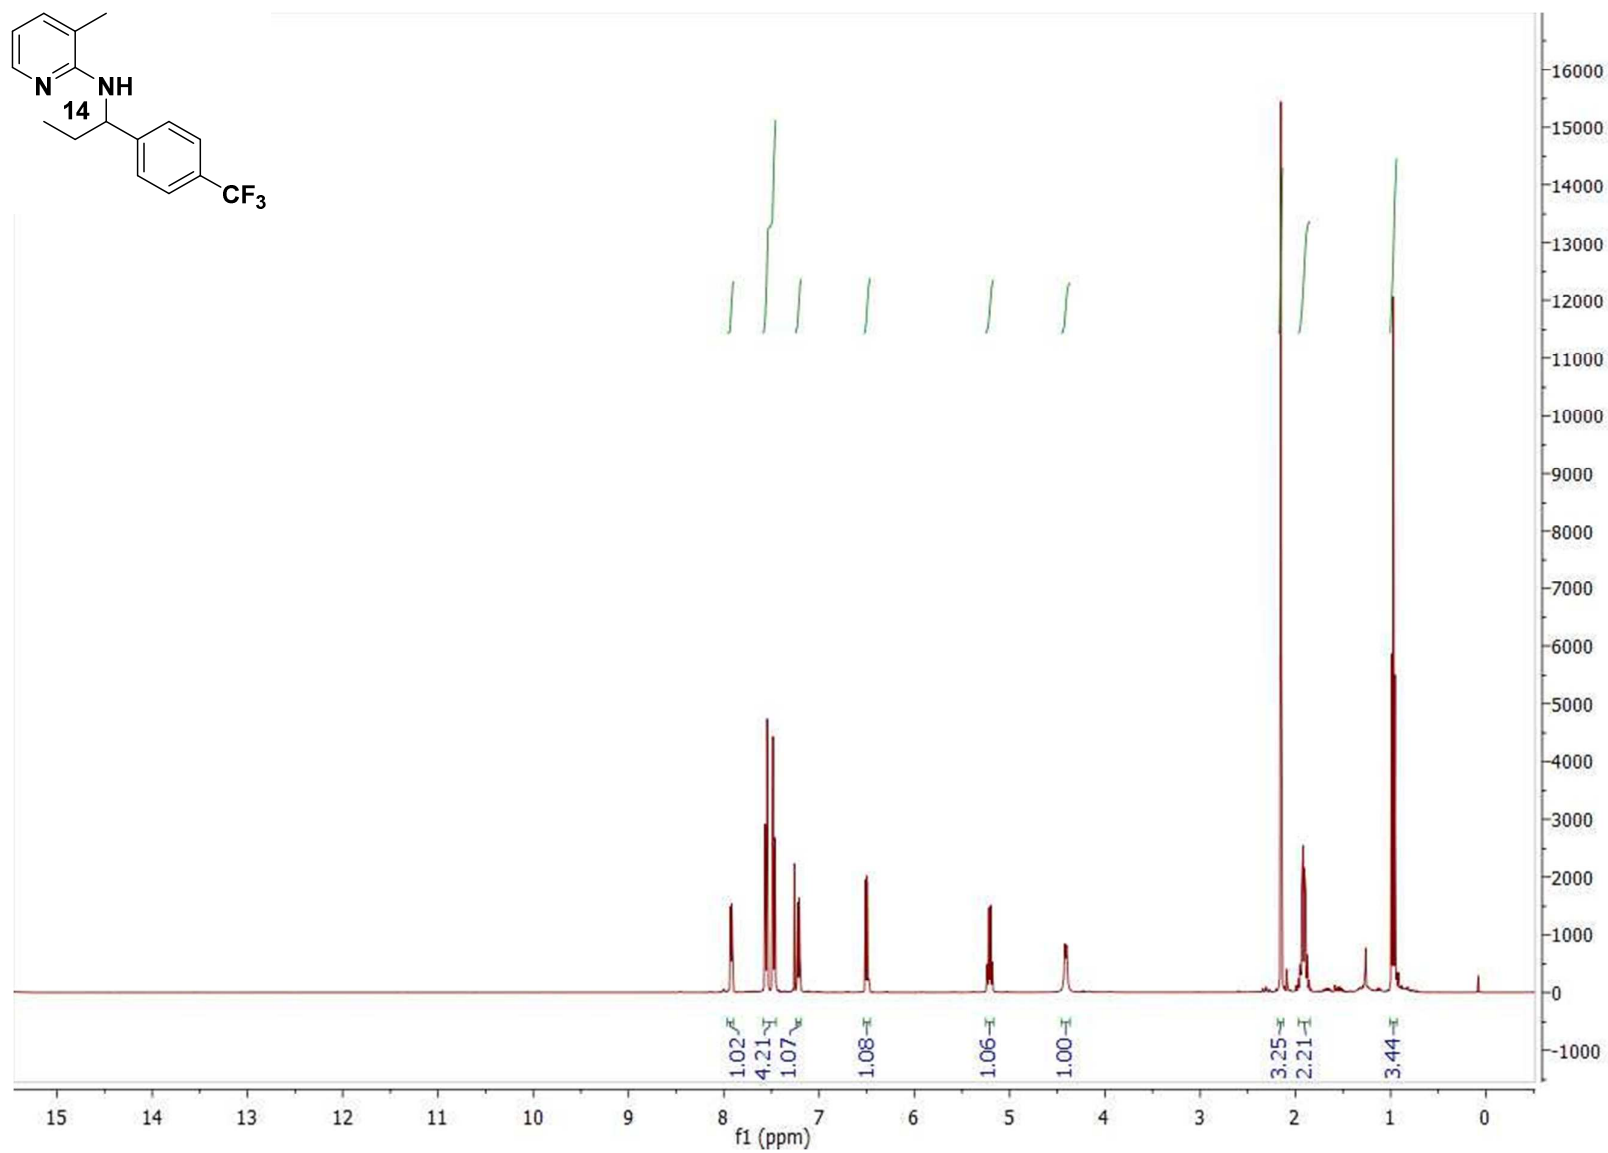

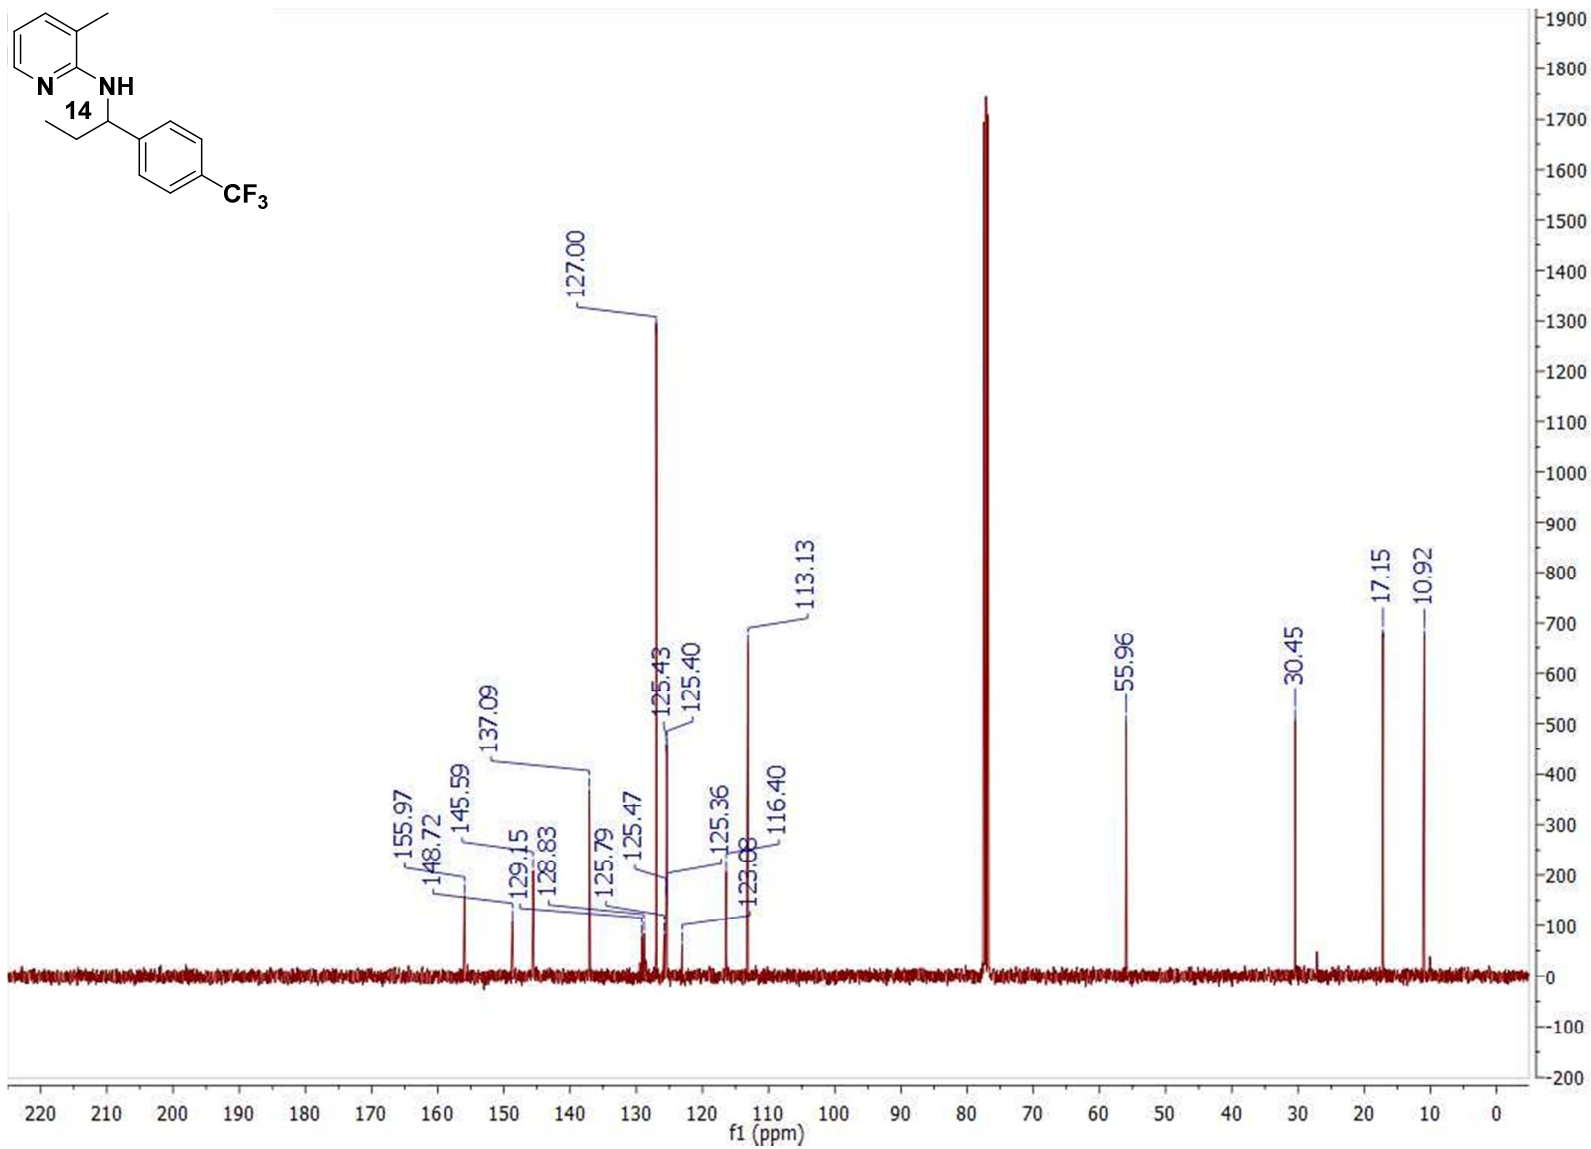

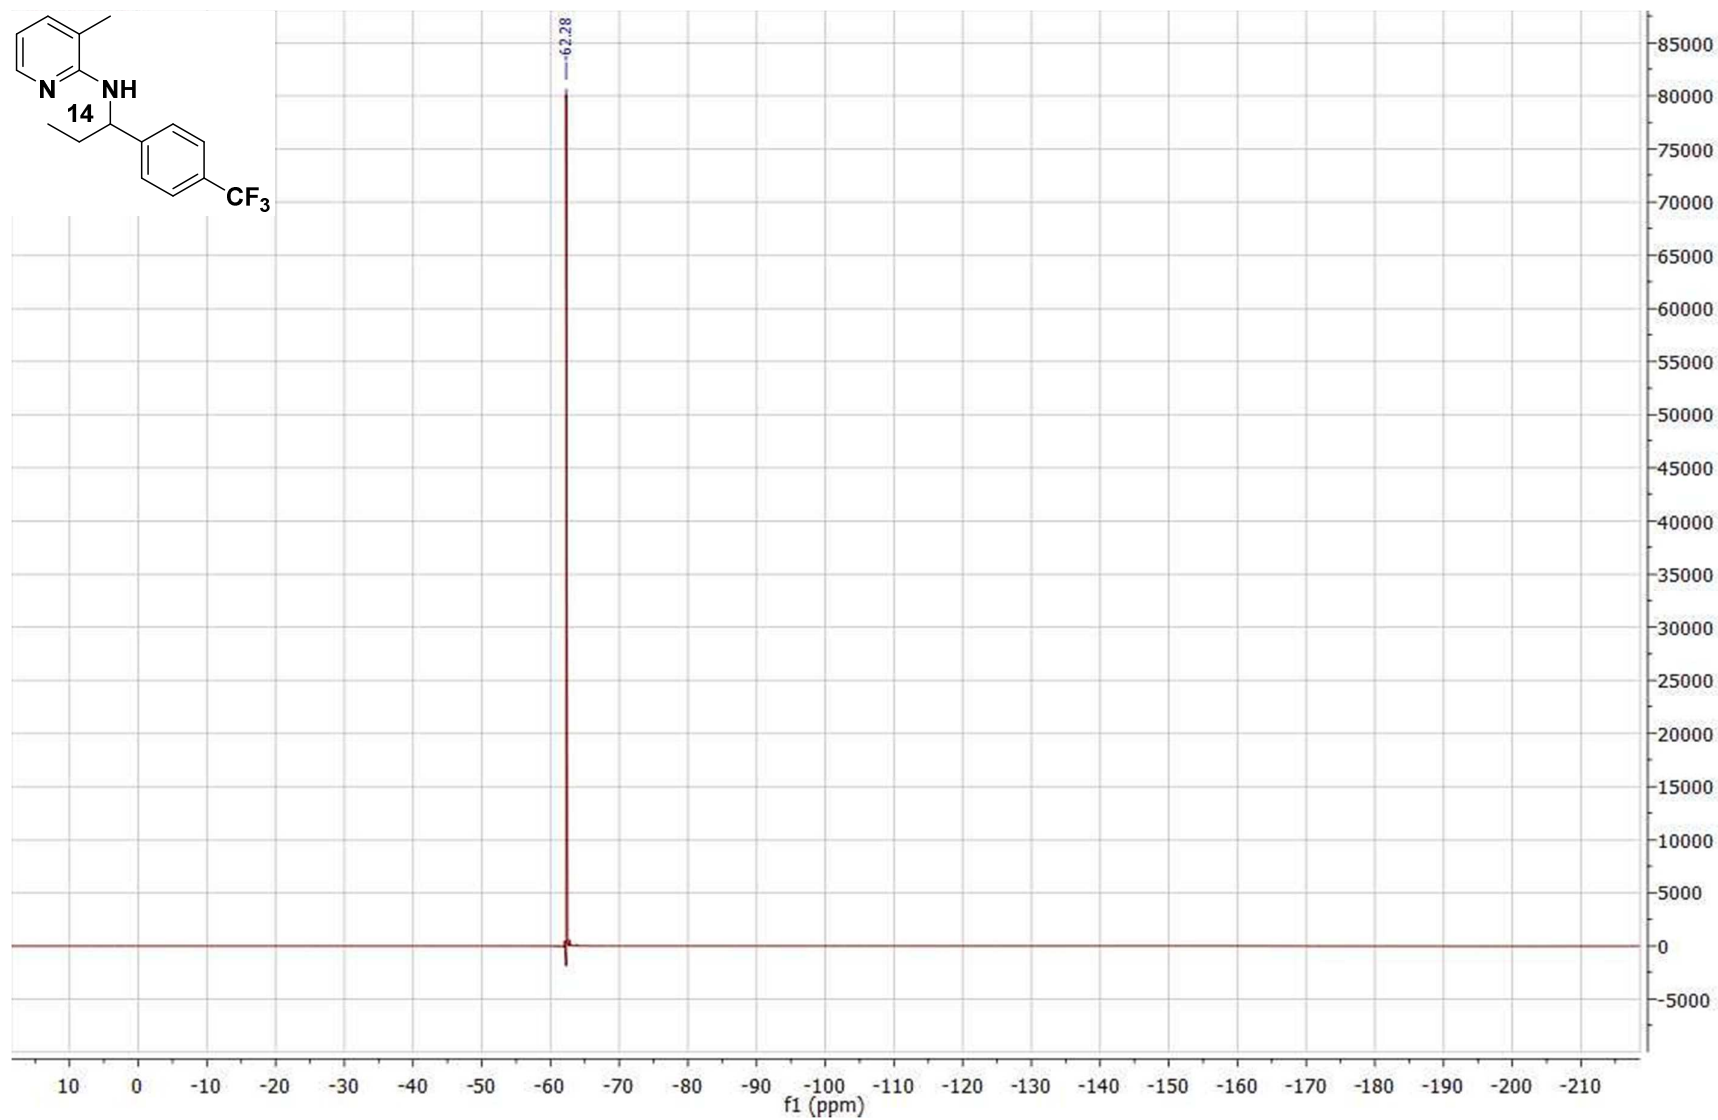

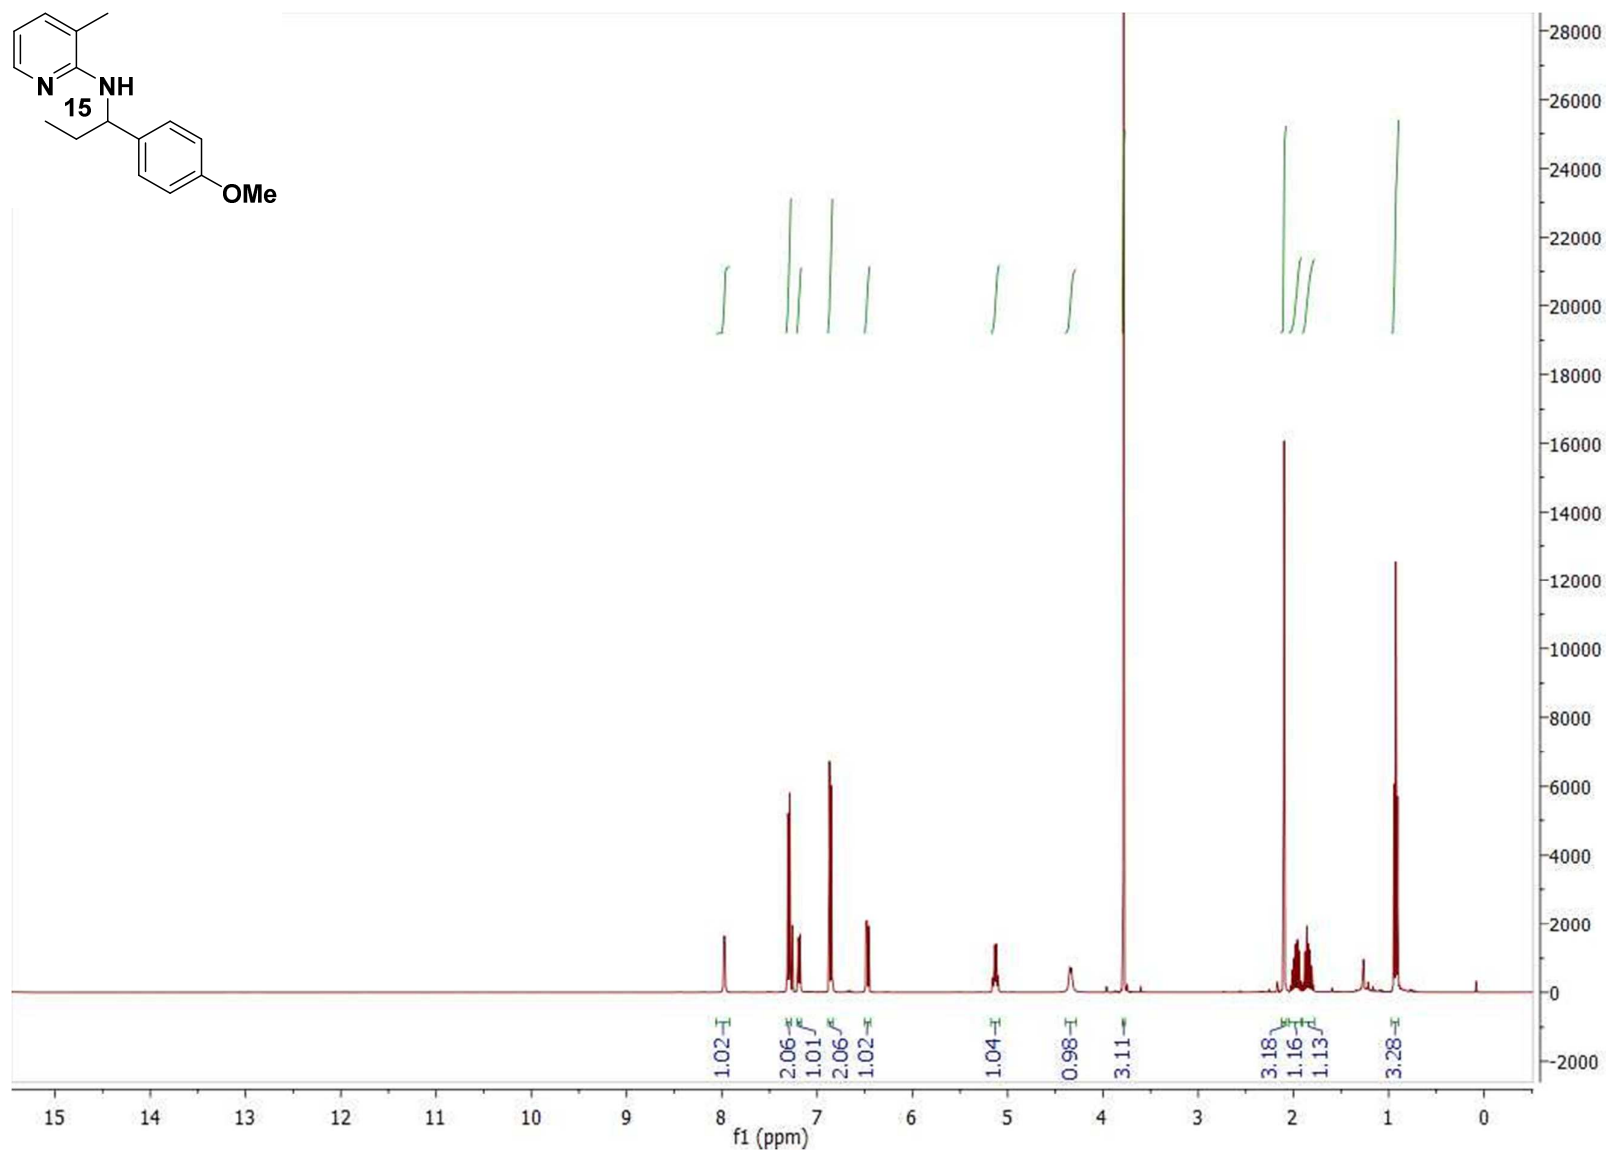

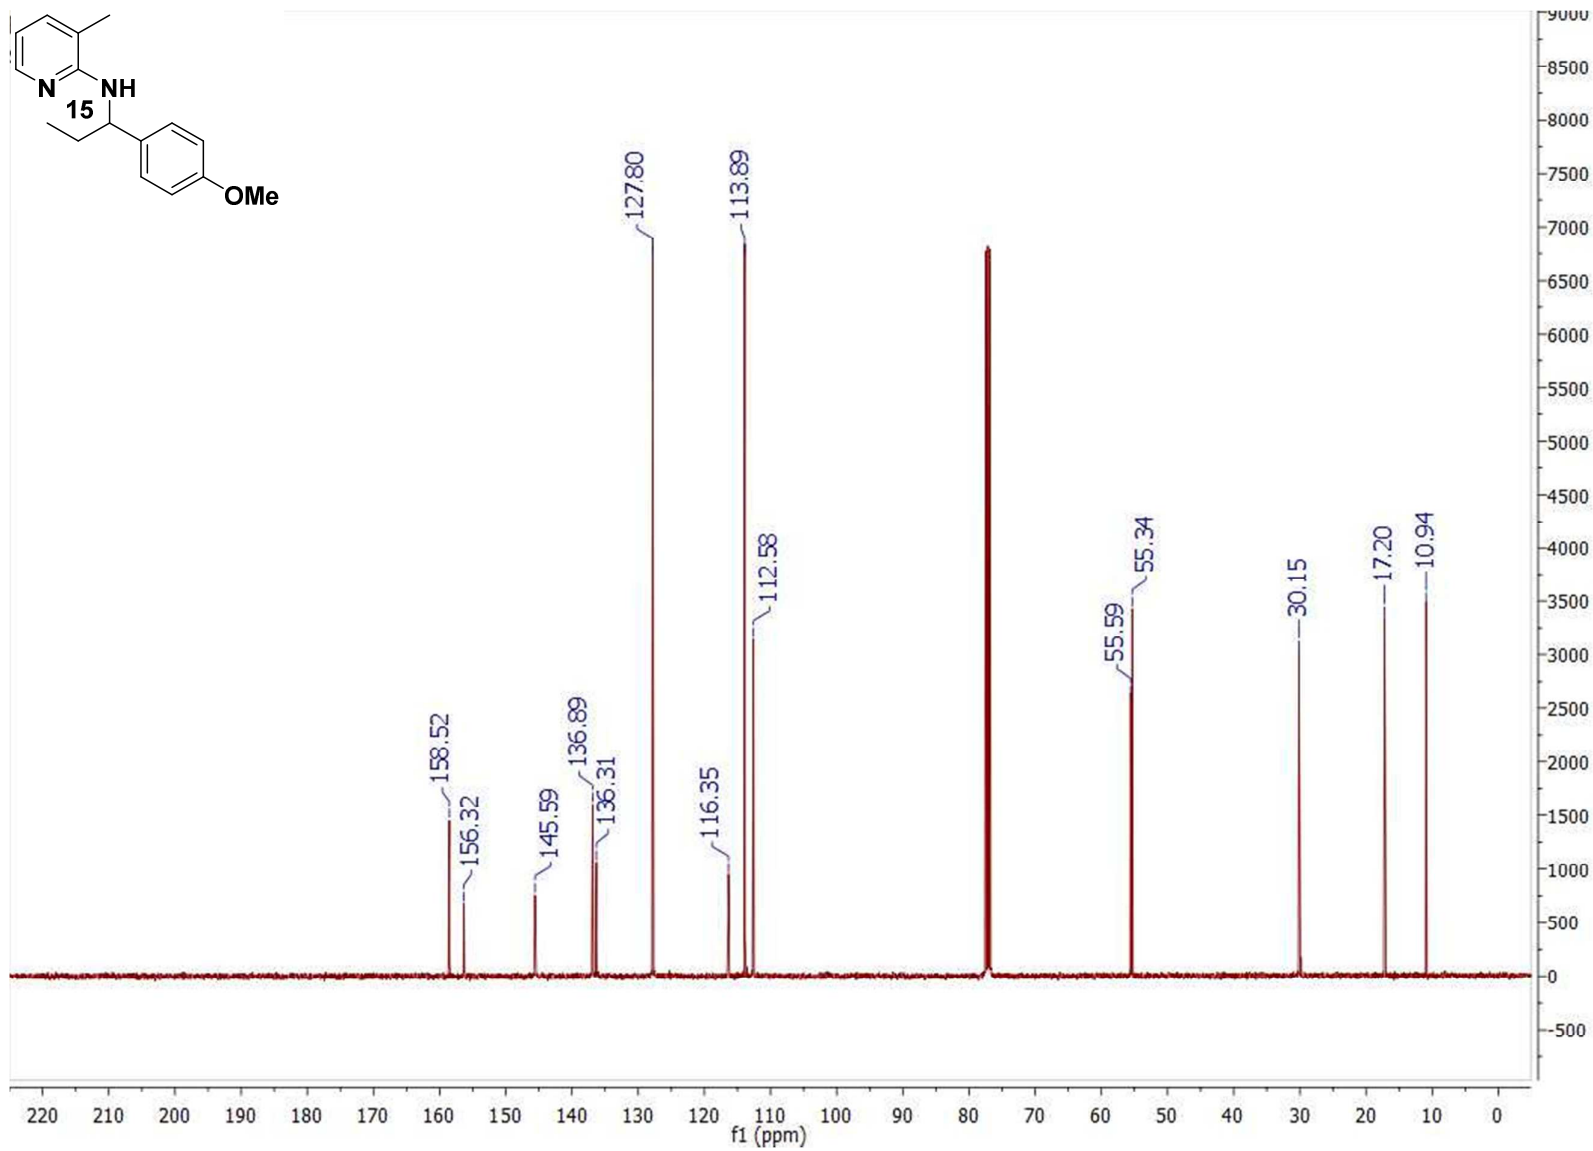

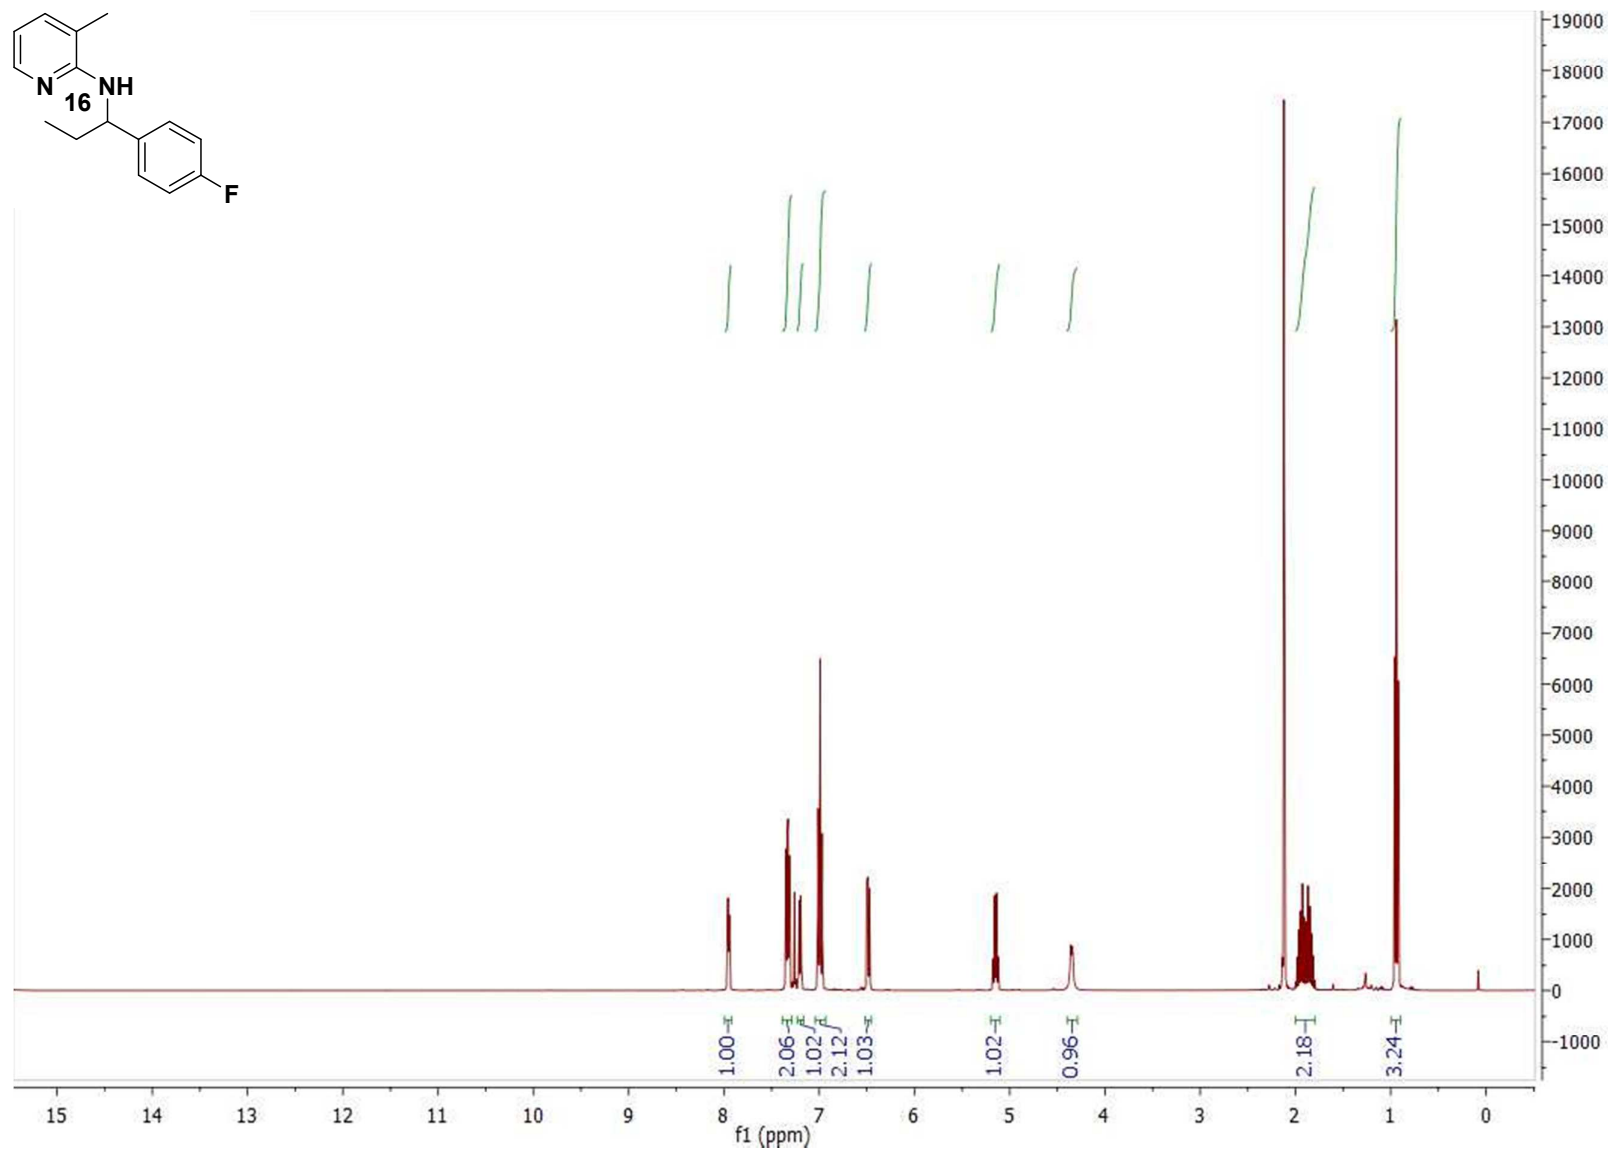



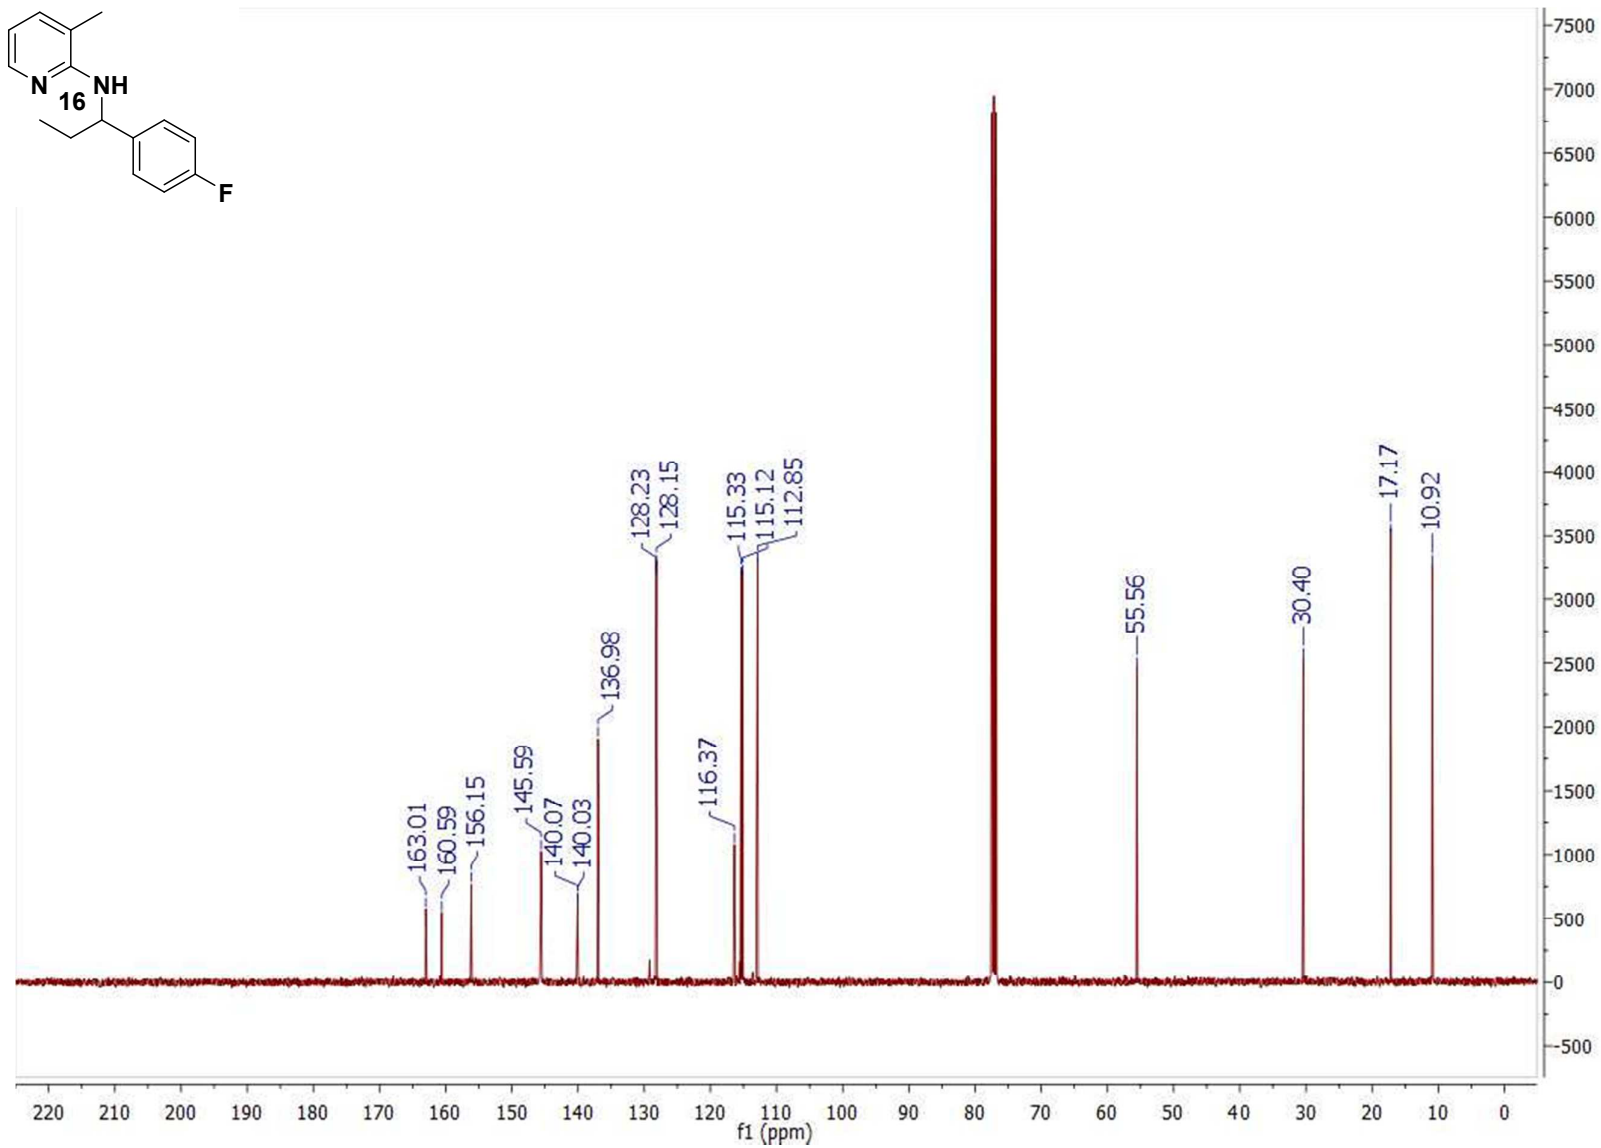

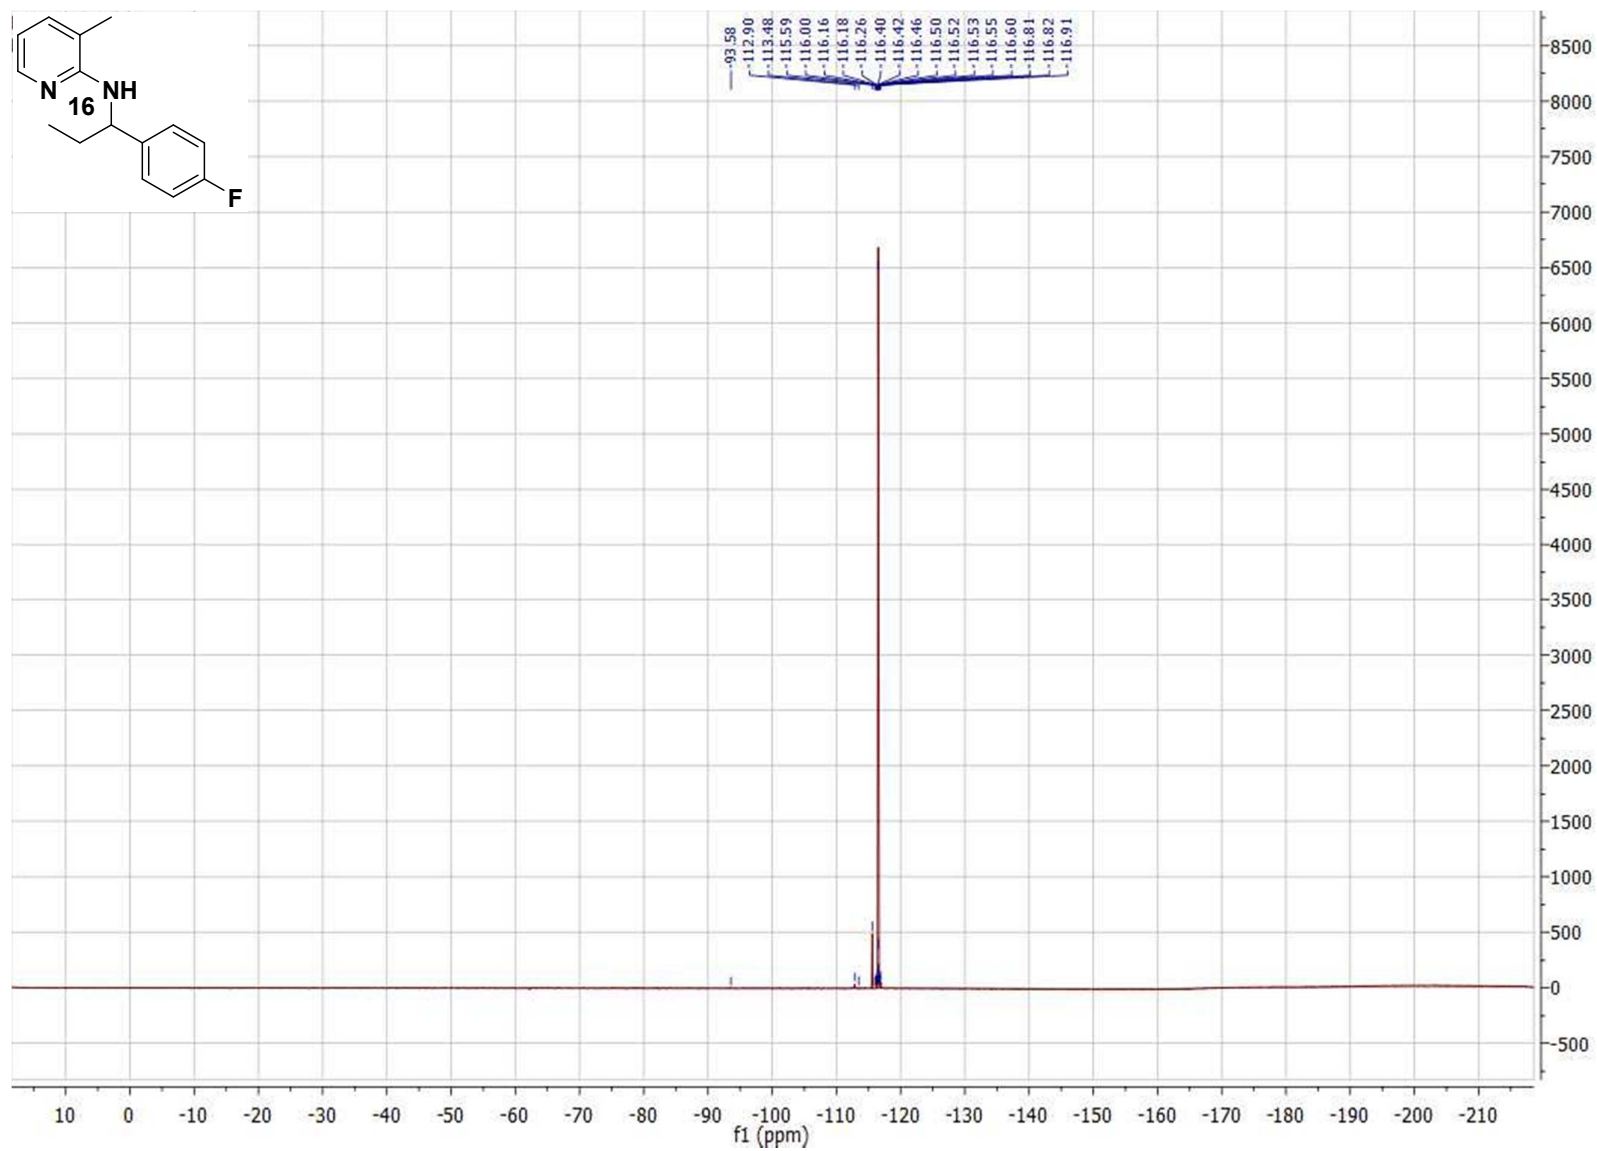

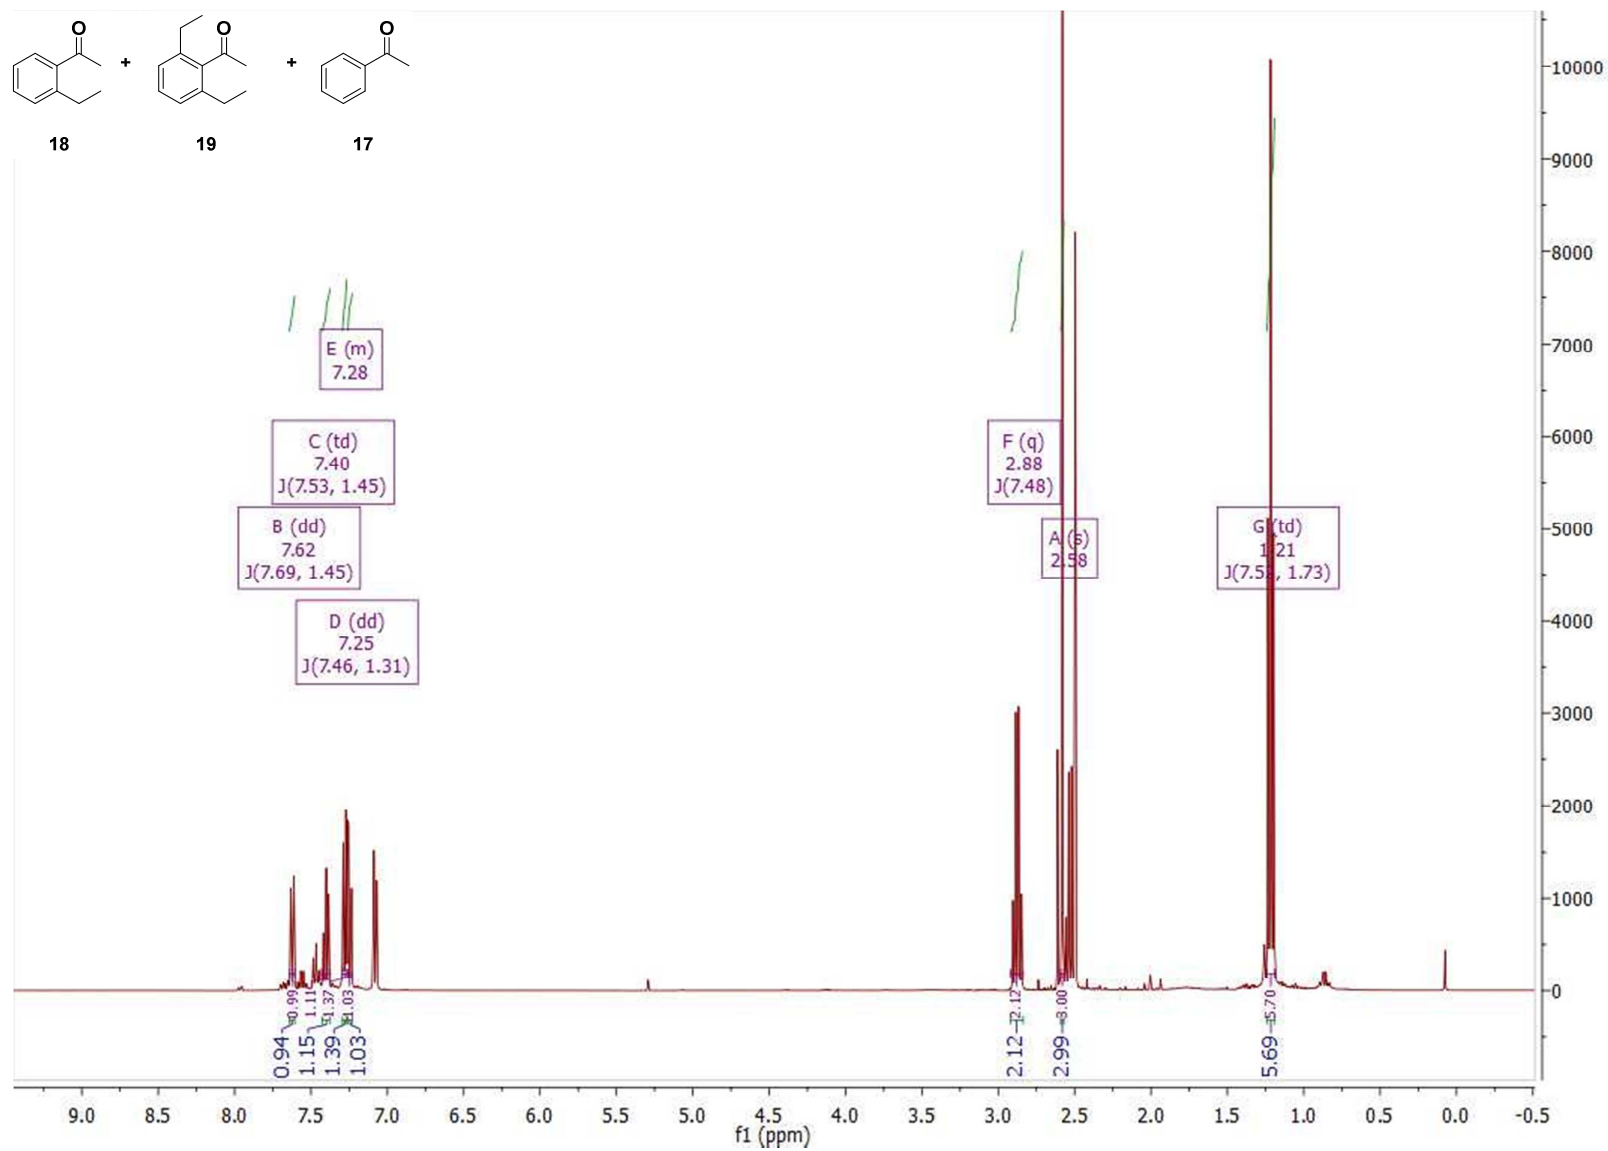

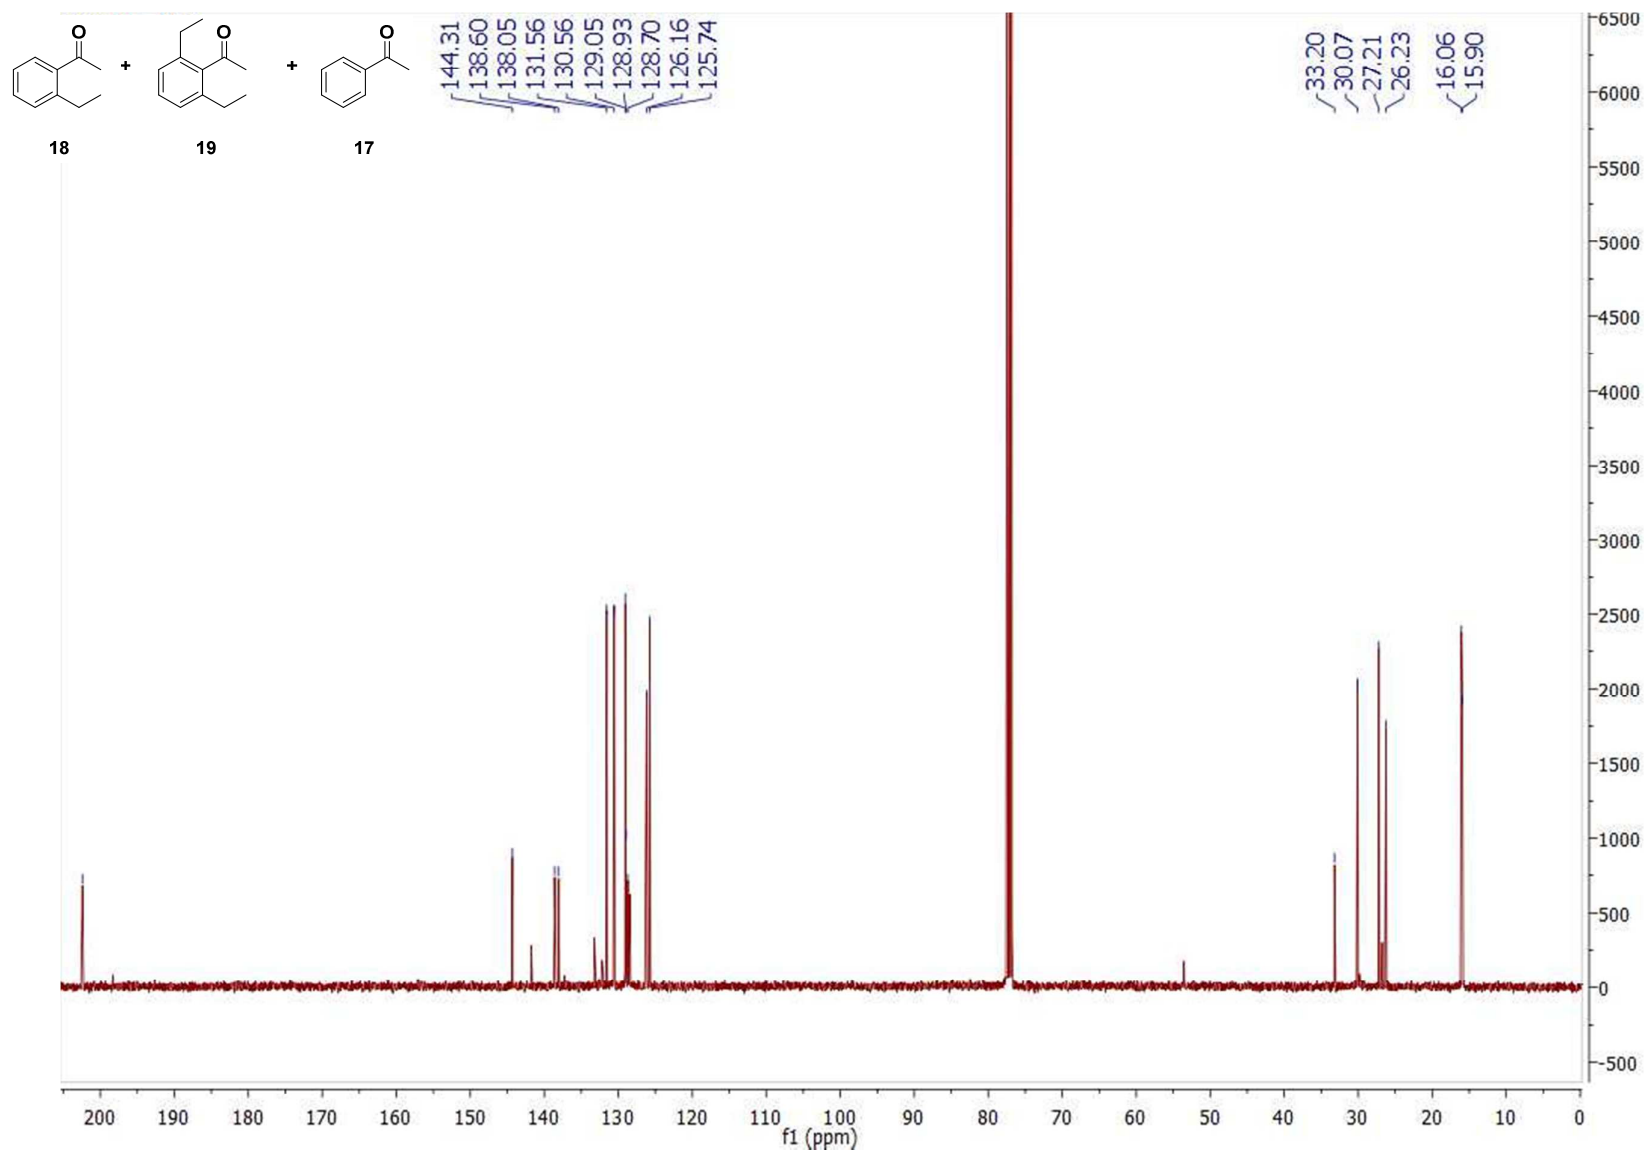

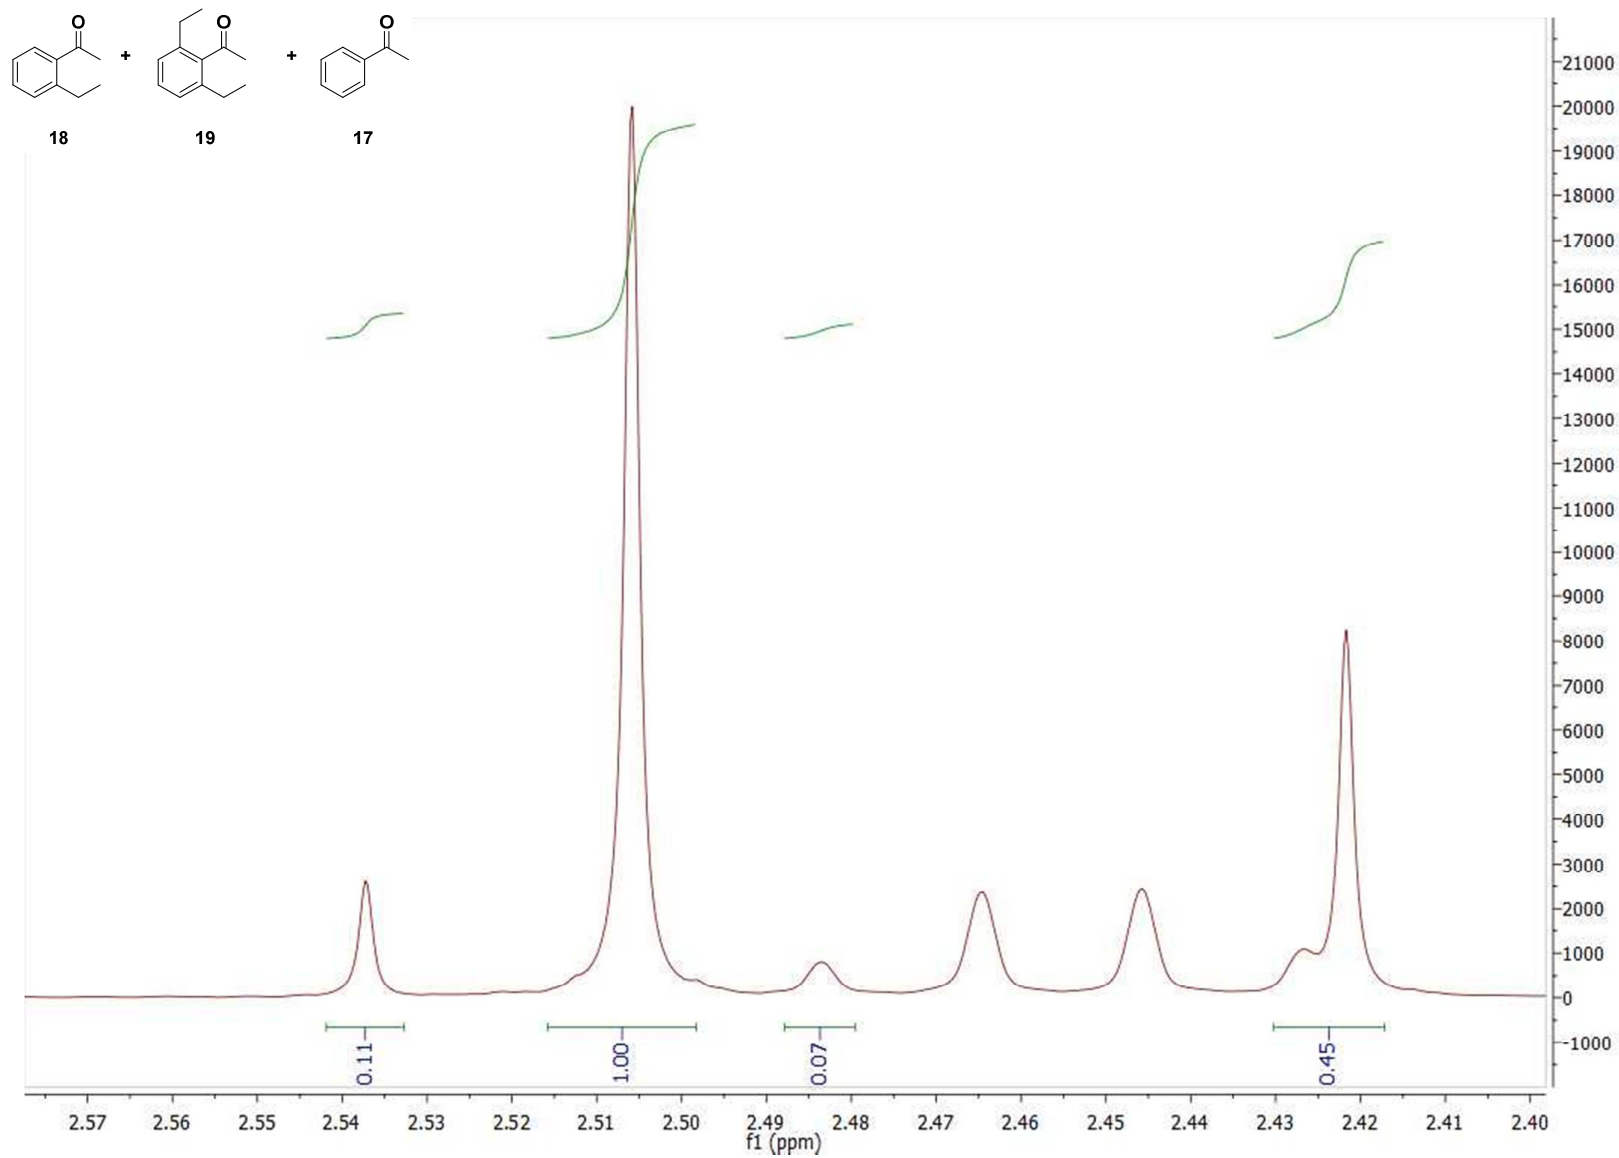

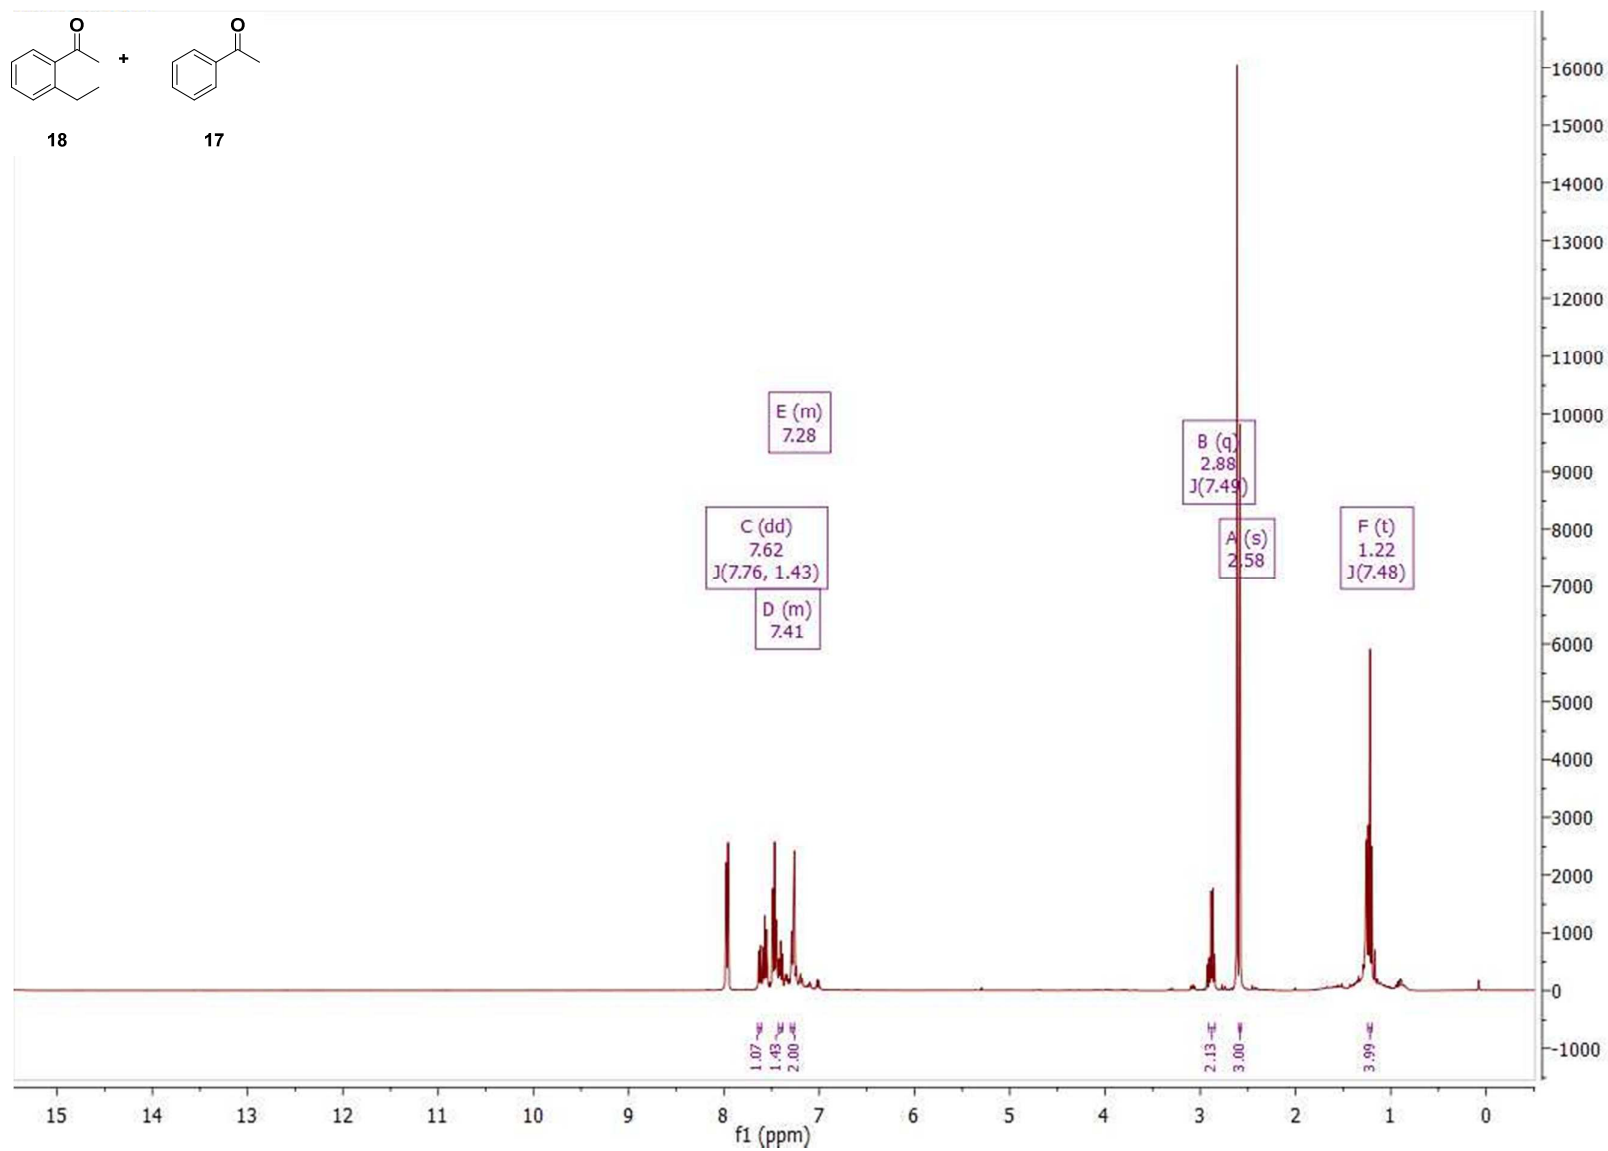

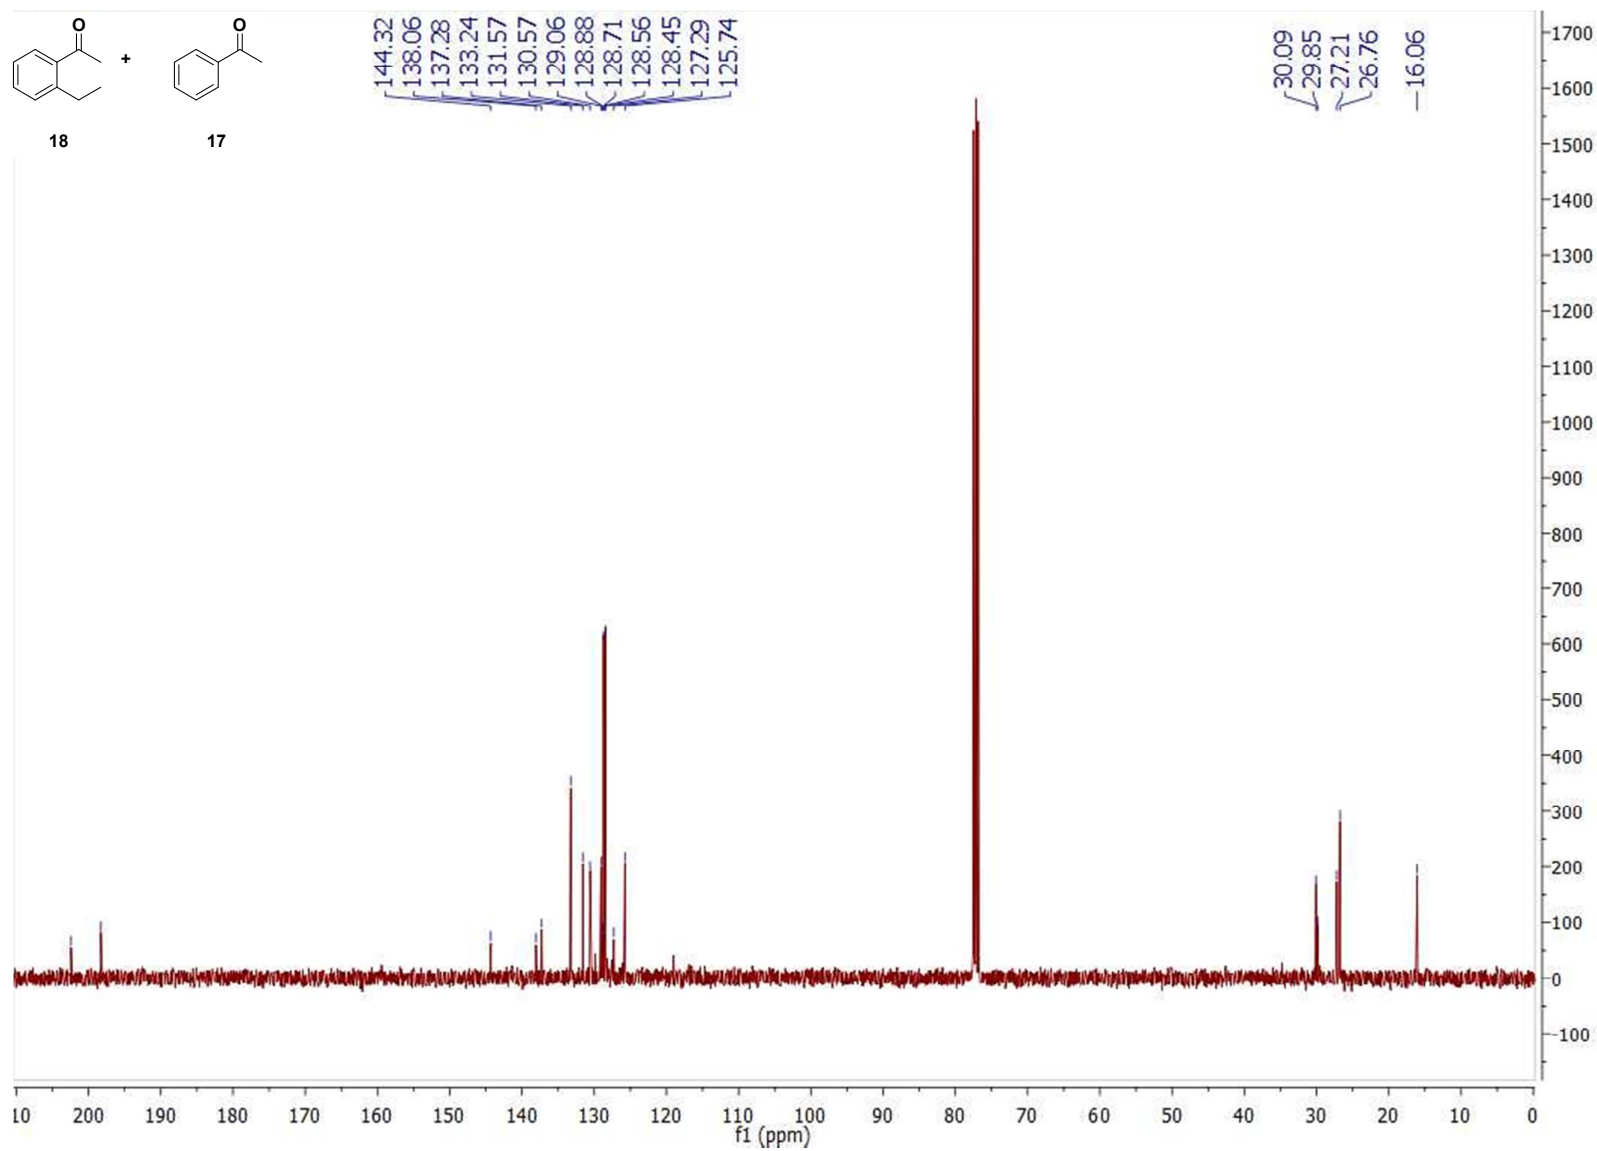

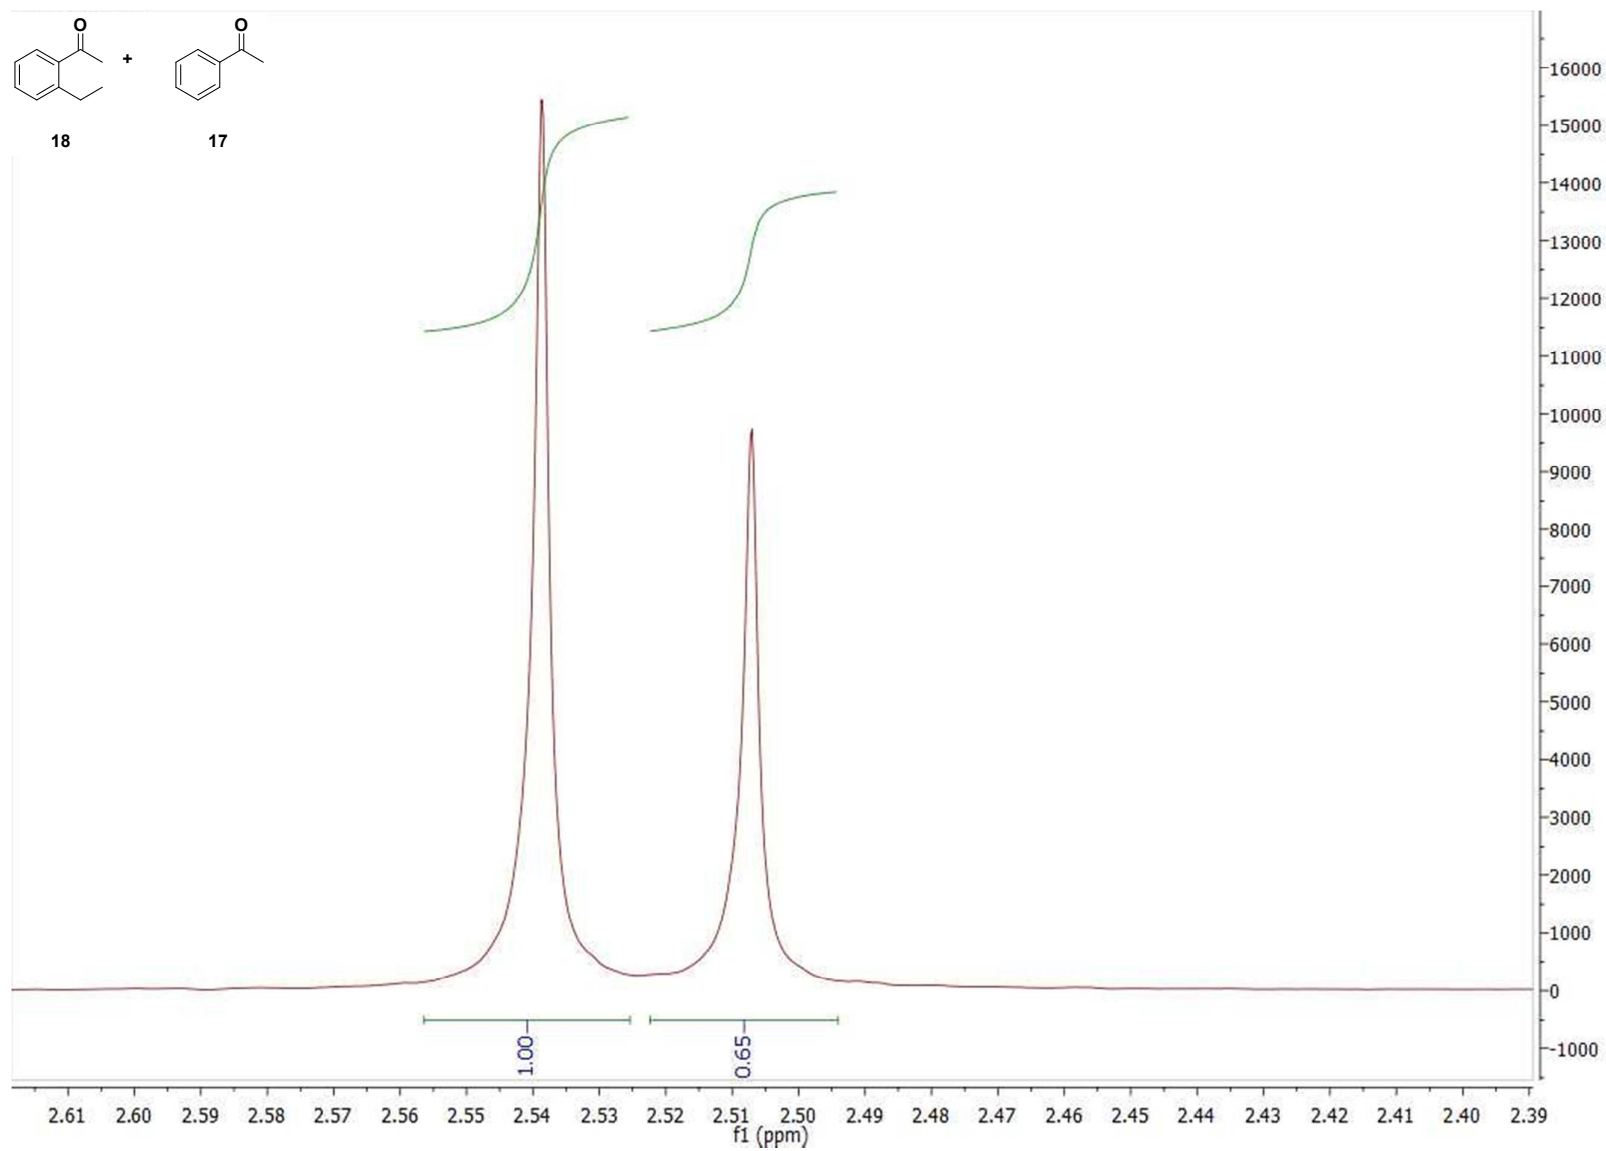

Supplement: Supplementary file 1 [file 9049924]
